# Supplementary material for: Honey bee (Apis mellifera) colony strength and its effects on pollination and yield in highbush blueberries (Vaccinium corymbosum)
Source: PeerJ. 2021 Jul 27;9:e11634. doi: 10.7717/peerj.11634 (PMC8323595; doi:10.7717/peerj.11634)
Supplement: Supplemental Information 2 — This also includes honey bee strength and disease assessment. [file peerj-09-11634-s002.xlsx]

## Sheet: Metadata
Dataset	Year	Notes
bees	2019
berry	2019
diseases	2019
flight	2019	only contains flight measurements for tagged colonies
visitation	2019
strength	2019
newflight	2019	apiary data for 2019, contains flight measurements from all fields surveyed
total	2019	flight and bees combined by colony and time of season
alldata	2019	berry, visitation, and apiary combined by field and time of season
bees2	2020
berry2020	2020
diseasesplus2020	2020
visitation2020	2020
apiary2020	2020
alldata2020	2020	berry2020, visitation2020, and apiary2020 combined by field and time of season
alldatabothyears	2019/2020	alldata and alldata2020 combined
flight2noav	2020	flight data for (2020 with outlier farm removed over concerns of corrupted audio data)
total2020	2020	flight2noav and bees2 combined by colony and time of season

## Sheet: Variables
Variables used in analysis	Dataset (first seen in)	Variable type	Notes
Field	bees	categorical	Eight levels, true name of blueberry fields, kept anonymous for purpose of publication
Farm	bees	categorical	Four levels, monikers given to fields for anonymity
Colony	bees	discrete	All colonies used for internal frame assessements were given an identifier from 1-50, spanning across all fields
EFB Severity	bees	discrete	Rating from 0 (not present), 1, 2, and 3 (most severe)
Diseases	bees	discrete	Number of diseases recorded in a single colony (EFB, AFB, sacbrood, chalkbrood, and unknown)
Bloom	bees	categorical	Beginning, middle, or end, dates as described in text
Date	bees	n/a	Date assessment was taken, used to determine bloom
Adult	bees	continuous	Number of full frames of adult bees (100% coverage), calculated for each colony by summing all frame percentages (as whole numbers) and dividing by 100
Brood	bees	continuous	Number of full frames of brood (100% coverage), calculated the same as adult
Cluster	bees	discrete	Cluster counts as described in text, calculated for each colony by summing all top and bottom box estimates and dividing by 2
Pollen Frames	bees	discrete	Number of pollen frames encountered during frame by frame assessment
Frame Sides	bees	discrete	Total number of frame sides for a colony
Queen	bees	discrete	Two levels: 1 QR, 'queenright" or presence of queen, and 0 for QLESS, 'queenless" or absence of queen
Assessment	bees	categorical	Three levels: FIRST, SECOND, or LAST, used to keep track of which assessment for each colony
Cluster Temp (F)	bees	continuous	Ambient temperature when cluster counts where taken, in degrees Farenheit. Standard conversion for Celsius used for manuscript
Field ID	berry	categorical	13 levels, Field identification number provided by blueberry growers, used to differentiation between different fields at the same farm, and different cultivars
Variety	berry	categorical	Two levels: Duke or Liberty
Plant Number	berry	discrete	tagged plants, 1-30
Cluster #1 fruit	berry	discrete	number of berries observed on selected cluster
Cluster #2 fruit	berry	discrete	number of berries observed on selected cluster
Cluster #3 fruit	berry	discrete	number of berries observed on selected cluster
Cluster #4 fruit	berry	discrete	number of berries observed on selected cluster
#1 Flowers unset	berry	discrete	number of flowers unset on selected cluster
#2 Flowers unset	berry	discrete	number of flowers unset on selected cluster
#3 Flowers unset	berry	discrete	number of flowers unset on selected cluster
#4 Flowers unset	berry	discrete	number of flowers unset on selected cluster
FRUIT	berry	discrete	sum of fruit clusters
UNSET	berry	discrete	sum of unset flowers
FRUITSET	berry	continuous	fruit/(fruit+unset) *100
# of canes	berry	discrete
# of fruit clusters, cane 1	berry	discrete
# of fruit clusters, cane 2	berry	discrete
AVG clusters per cane	berry	continuous
Avg. Berries per cluster	berry	continuous
300 berries weight	berry	continuous
Avg berry weight (g)	berry	continuous
Season	flight	categorical	synonomous with bloom, unused for clarity
Time	flight	n/a
Entrances	flight	discrete	number of entrances bees could enter the colony from 1-4, also seen as "# of flight entrances" but was unused
Flight Temp	flight	continuous	ambient temperature when flight was recorded
Flight	flight	discrete	number of returning foraging bees recorded entering the colony within a one-minute time interval
Site Number	visitation	discrete	synonymous with plant number
Crop Stage	visitation	categorical
Bumble Bee Visits	visitation	discrete	number of bumble bee visits within a one minute time period
Honey Bee Visits	visitation	discrete	number of honey bee visits within a one minute time period

## Sheet: bees
Field	Farm	Colony	EFB Severity	Diseases	Bloom	Date	Adult	Brood	Cluster	Pollen Frames	Frame Sides	Queen	Assessment	Cluster Temp (F)
Verboort	Farm 1	1	0	0	Early	2019-04-21	14.25	2.25		2	34	1	FIRST	40
Verboort	Farm 1	2	1	2	Early	2019-04-21	12.95	6.05		0	30	1	FIRST	40
Verboort	Farm 1	3	0	0	Early	2019-04-21	7.55	2.55		0	32	1	FIRST	40
Verboort	Farm 1	4	0	0	Early	2019-04-21	7.5	3.5		0	28	1	FIRST	40
Verboort	Farm 1	5	0	0	Early	2019-04-21	13.15	5.9		0	33	1	FIRST	40
Verboort	Farm 1	6	0	0	Early	2019-04-21	15.3	6.6		2	35	1	FIRST	40
Verboort	Farm 1	7	0	0	Early	2019-04-21	15.65	5		2	35	1	FIRST	40
Verboort	Farm 1	8	0	0	Early	2019-04-21	5.9	3.7		2	21	1	FIRST	40
Verboort	Farm 1	9	0	0	Early	2019-04-21	8.25	6.95		4	30	1	FIRST	40
Verboort	Farm 1	10	0	1	Early	2019-04-21	6.75	4.45		0	27	1	FIRST	40
Verboort	Farm 1	11	0	0	Early	2019-04-21	14.95	6.75		6	31	1	FIRST	40
Verboort	Farm 1	12	0	0	Early	2019-04-21	21.9	7.65		3	36	1	FIRST	40
Forest Hills	Farm 2	13	0	1	Early	2019-04-21	4.5	3.2		1	18	1	FIRST	40
Forest Hills	Farm 2	14	0	1	Early	2019-04-21	3.2	2.95		2	11	1	FIRST	40
Forest Hills	Farm 2	15	0	1	Early	2019-04-21	17.45	3.5		3	32	1	FIRST	40
Forest Hills	Farm 2	16	1	2	Early	2019-04-21	3.15	2.95		0	15	1	FIRST	40
Forest Hills	Farm 2	17	1	3	Early	2019-04-21	5.7	2.1		0	15	1	FIRST	40
Forest Hills	Farm 2	18	0	0	Early	2019-04-21	7.5	1.6		1	23	1	FIRST	40
Forest Hills	Farm 2	19	0	0	Early	2019-04-21	6.75	2.45		1	25	1	FIRST	40
Forest Hills	Farm 2	20	0	0	Early	2019-04-21	8.4	1.55		3	24	1	FIRST	40
Forest Hills	Farm 2	21	1	1	Early	2019-04-21	3.95	1.55		1	15	1	FIRST	40
Forest Hills	Farm 2	22	1	1	Early	2019-04-21	10.8	2.35		1	27	1	FIRST	40
Forest Hills	Farm 2	23	0	0	Early	2019-04-21	9.85	0.95		1	26	1	FIRST	40
Forest Hills	Farm 2	24	0	0	Early	2019-04-21	10.45	2.45		2	30	1	FIRST	40
Angel Valley	Farm 3	25	0	0	Early	2019-04-26	9.9	0	14	2	27	0	FIRST	40
Angel Valley	Farm 3	26	0	0	Early	2019-04-26	12.55	2.55	14.25	2	28	1	FIRST	40
Angel Valley	Farm 3	27	0	2	Early	2019-04-26	3.95	4.4	9.5	2	23	1	FIRST	40
Angel Valley	Farm 3	28	0	1	Early	2019-04-26	17.65	5.8	20	7	40	1	FIRST	40
Angel Valley	Farm 3	29	0	1	Early	2019-04-26	13.55	3.35	12.25	2	26	1	FIRST	40
Angel Valley	Farm 3	30	0	1	Early	2019-04-26	0.7	0.45	1	1	7	1	FIRST	40
Angel Valley	Farm 3	31	0	0	Early	2019-04-26	6.35	4.75	12.25	4	28	1	FIRST	40
Angel Valley	Farm 3	32	0	1	Early	2019-04-26	10.7	4.6	16.5	10	31	1	FIRST	40
Angel Valley	Farm 3	33	0	0	Early	2019-04-26	14.8	3.95	14.75	6	30	1	FIRST	40
Angel Valley	Farm 3	34	0	0	Early	2019-04-26	6.15	4.7	9.75	1	19	1	FIRST	40
Angel Valley	Farm 3	35	0	0	Early	2019-04-26	3.75	5.05	6	0	15	1	FIRST	40
Angel Valley	Farm 3	36	0	1	Early	2019-04-26	5.45	2.8	9	1	20	1	FIRST	40
Angel Valley	Farm 3	37	0	1	Early	2019-04-26	5.25	3.9	9.5	0	23	1	FIRST	40
Angel Valley	Farm 3	38	0	0	Early	2019-04-26	2.2	3.55	7.5	1	20	1	FIRST	40
Five Oaks	Farm 4	39	0	1	Early	2019-04-27	8.45	8.15	16.75	1	31	1	FIRST	40
Five Oaks	Farm 4	40	0	0	Early	2019-04-27	9.45	6.71	16.75	3	31	1	FIRST	40
Five Oaks	Farm 4	41	0	0	Early	2019-04-27	7.7	7	18.5	4	31	1	FIRST	40
Five Oaks	Farm 4	42	0	0	Early	2019-04-27	9.25	7.9	17	2	28	1	FIRST	40
Five Oaks	Farm 4	43	0	0	Early	2019-04-27	14.25	5.6	16.25	4	36	1	FIRST	40
Five Oaks	Farm 4	44	0	0	Early	2019-04-27	14.8	0	17.5	4	33	0	FIRST	40
Five Oaks	Farm 4	45	0	0	Early	2019-04-27	7.95	3.55	15	3	27	1	FIRST	40
Five Oaks	Farm 4	46	0	0	Early	2019-04-27	10.45	5.65	15.75	2	31	1	FIRST	40
Verboort	Farm 1	1	0	0	Middle	2019-05-05	16.4	8	20.5	2	35	0	SECOND	50
Verboort	Farm 1	2	0	1	Middle	2019-05-05	16.5	7.35	20.25	3	35	1	SECOND	50
Verboort	Farm 1	3	0	0	Middle	2019-05-05	13.35	6.7	15.5	0	34	1	SECOND	50
Verboort	Farm 1	4	0	1	Middle	2019-05-05	7.5	8.15	12.75	0	29	1	SECOND	50
Verboort	Farm 1	5	0	0	Middle	2019-05-05	15.95	3.2	17.5	7	32	0	SECOND	50
Verboort	Farm 1	6	0	0	Middle	2019-05-05	14.8	7.25	15.25	0	32	1	SECOND	50
Verboort	Farm 1	7	0	0	Middle	2019-05-05	17.7	5.1	18	3	33	1	SECOND	50
Verboort	Farm 1	8	1	1	Middle	2019-05-05	8.9	7.7	11.25	2	25	1	SECOND	50
Verboort	Farm 1	9	1	2	Middle	2019-05-05	11.85	7.1	21.5	2	60	1	SECOND	50
Forest Hills	Farm 2	13	0	0	Middle	2019-05-05	5.35	6.3	9	1	18	1	SECOND	50
Forest Hills	Farm 2	14	2	2	Middle	2019-05-05	5.3	4.35	5	2	12	1	SECOND	50
Forest Hills	Farm 2	15	0	2	Middle	2019-05-05	14.1	10.45	16.5	1	31	1	SECOND	55
Forest Hills	Farm 2	16	2	2	Middle	2019-05-05	3.7	2.5	4.5	2	13	0	SECOND	55
Forest Hills	Farm 2	17	1	2	Middle	2019-05-05	6.9	8.3	7.5	3	19	1	SECOND	55
Forest Hills	Farm 2	18	0	1	Middle	2019-05-05	6.35	6.1	8.5	1	27	1	SECOND	55
Forest Hills	Farm 2	19	0	0	Middle	2019-05-05	8.4	6.5	9.5	1	26	1	SECOND	55
Forest Hills	Farm 2	20	0	0	Middle	2019-05-05	7.25	0	7	3	22	1	SECOND	55
Forest Hills	Farm 2	21	1	1	Middle	2019-05-05	6.45	8.6	9.25	1	23	1	SECOND	55
Forest Hills	Farm 2	22	0	0	Middle	2019-05-05	6.95	6	9.75	0	26	1	SECOND	55
Forest Hills	Farm 2	23	0	1	Middle	2019-05-05	5	6.4	10	0	23	1	SECOND	55
Forest Hills	Farm 2	24	0	0	Middle	2019-05-05	10.45	8.4	14	2	31	1	SECOND	55
Five Oaks	Farm 4	39	1	2	Middle	2019-05-11	12.7	9.05	18.25	1	35	1	LAST	55
Five Oaks	Farm 4	40	0	1	Middle	2019-05-11	10.4	8.6	18.5	3	33	1	LAST	55
Five Oaks	Farm 4	41	0	1	Middle	2019-05-11	9.6	8.4	17.75	2	34	1	LAST	55
Five Oaks	Farm 4	42	0	0	Middle	2019-05-11	10.75	7.7	17.5	3	34	1	LAST	55
Five Oaks	Farm 4	43	1	1	Middle	2019-05-11	10.4	5.55	21	4	34	1	LAST	55
Five Oaks	Farm 4	44	0	0	Middle	2019-05-11	9.8	0	15.5	6	32	1	LAST	55
Five Oaks	Farm 4	45	0	2	Middle	2019-05-11	7.45	3.1	13.75	1	32	1	LAST	55
Five Oaks	Farm 4	46	0	1	Middle	2019-05-11	13.35	7.7	16.75	2	39	1	LAST	55
Five Oaks	Farm 4	47	0	1	Middle	2019-05-11	13.35	8.45	22	0	39	1	FIRST	61
Five Oaks	Farm 4	48	0	0	Middle	2019-05-11	13.2	9.85	23.25	1	50	1	FIRST	61
Five Oaks	Farm 4	49	0	0	Middle	2019-05-11	2.85	0.1	6.5	0	12	0	FIRST	61
Five Oaks	Farm 4	50	0	1	Middle	2019-05-11	5.75	6.6	16.75	1	33	1	FIRST	61
Verboort	Farm 1	1	0	0	Late	2019-05-19	11.3	0	18.75	3	32	1	LAST	50
Verboort	Farm 1	2	0	1	Late	2019-05-19	15.6	7.8	20.75	1	50	1	LAST	50
Verboort	Farm 1	3	0	1	Late	2019-05-19	15.15	8.65	19	0	48	1	LAST	50
Verboort	Farm 1	4	2	3	Late	2019-05-19	15.7	9.5	16.5	0	32	1	LAST	50
Verboort	Farm 1	5	0	0	Late	2019-05-19	9.8	0.3	16.25	1	31	1	LAST	50
Verboort	Farm 1	6	3	2	Late	2019-05-19	11.5	6.5	16	1	32	1	LAST	50
Verboort	Farm 1	7	0	2	Late	2019-05-19	14.05	7.6	21.75	5	53	1	LAST	50
Verboort	Farm 1	8	0	1	Late	2019-05-19	10.55	6.45	16	0	32	1	LAST	52
Verboort	Farm 1	9	3	2	Late	2019-05-19	9	6.25	22.5	1	47	1	LAST	52
Verboort	Farm 1	10	3	2	Late	2019-05-19	8.35	8	16.25	3	38	1	LAST	52
Verboort	Farm 1	11	3	1	Late	2019-05-19	10	5.4	16.25	2	47	1	LAST	52
Verboort	Farm 1	12	1	2	Late	2019-05-19	12.8	6.1	19.5	4	45	1	LAST	52
Forest Hills	Farm 2	13	3	3	Late	2019-05-19	5.9	5.55	8.25	0	26	1	LAST	55
Forest Hills	Farm 2	14	1	3	Late	2019-05-19	3.95	4.85	6.5	2	27	1	LAST	55
Forest Hills	Farm 2	15	0	1	Late	2019-05-19	14.2	8.4	19.25	1	41	1	LAST	55
Forest Hills	Farm 2	16	2	3	Late	2019-05-19	2.15	2.7	2.25	1	11	1	LAST	55
Forest Hills	Farm 2	17	3	2	Late	2019-05-19	8.6	5.1	9.5	0	30	1	LAST	55
Forest Hills	Farm 2	18	1	1	Late	2019-05-19	6.25	4.85	12.25	0	31	1	LAST	55
Forest Hills	Farm 2	19	3	1	Late	2019-05-19	6.55	6.3	11	1	27	1	LAST	55
Forest Hills	Farm 2	20	0	0	Late	2019-05-19	4.7	0	5.5	2	15	1	LAST	55
Forest Hills	Farm 2	21	3	2	Late	2019-05-19	9.15	7.75	13.5	0	29	1	LAST	55
Forest Hills	Farm 2	22	0	1	Late	2019-05-19	6	5	12.75	0	32	1	LAST	55
Forest Hills	Farm 2	23	0	2	Late	2019-05-19	9.1	5.9	12.5	0	36	1	LAST	55
Forest Hills	Farm 2	24	0	0	Late	2019-05-19	13.55	8.05	21.5	2	45	1	LAST	55
Angel Valley	Farm 3	25	0	0	Late	2019-05-22	0	0	0	0	0	0	LAST	55
Angel Valley	Farm 3	26	0	1	Late	2019-05-22	9.9	0.95	12.25	0	24	1	LAST	55
Angel Valley	Farm 3	27	3	2	Late	2019-05-22	3.5	3.45	4.5	0	11	1	LAST	55
Angel Valley	Farm 3	28	3	1	Late	2019-05-22	16.4	7.35	22.5	0	41	1	LAST	55
Angel Valley	Farm 3	29	1	2	Late	2019-05-22	7.25	2.2	11	0	27	1	LAST	55
Angel Valley	Farm 3	30	0	0	Late	2019-05-22	0.2	0	0	0	2	0	LAST	55
Angel Valley	Farm 3	31	3	1	Late	2019-05-22	7.05	6.4	13.25	0	29	1	LAST	55
Angel Valley	Farm 3	32	0	0	Late	2019-05-22	8.2	2.15	14.5	0	15	1	LAST	55
Angel Valley	Farm 3	33	2	2	Late	2019-05-22	9.05	4.3	16.5	0	34	1	LAST	55
Angel Valley	Farm 3	34	3	1	Late	2019-05-22	4.2	4.8	8.5	0	16	1	LAST	55
Angel Valley	Farm 3	35	3	2	Late	2019-05-22	8.7	6.9	14	0	28	1	LAST	55
Angel Valley	Farm 3	36	3	2	Late	2019-05-22	9.85	6.75	5.25	0	24	1	LAST	55
Angel Valley	Farm 3	37			Late	2019-05-22					0		LAST	55
Angel Valley	Farm 3	38			Late	2019-05-22					0		LAST	55

## Sheet: berry
Farm	Field ID	Variety	Plant Number	Cluster #1 fruit	Cluster #2 fruit	Cluster #3 fruit	Cluster #4 fruit	#1 Flowers unset	#2 Flowers unset	#3 Flowers unset	#4 Flowers unset	FRUIT	UNSET	FRUITSET	# of canes	# of fruit clusters, cane 1	# of fruit clusters, cane 2	AVG clusters per cane	Avg. Berries per cluster	300 berries weight	Avg berry weight (g)
Verboort	1012	Duke	1	7	7	8	6	0	0	0	0	28	0	100	11	117	71	94	7	472	1.57333
Verboort	1012	Duke	2	6	11	8	9	0	0	0	0	34	0	100	13	63	65	64	8.5	472	1.57333
Verboort	1012	Duke	3	6	6	5	7	0	0	0	0	24	0	100	24	144	109	126.5	6	472	1.57333
Verboort	1012	Duke	4	10	8	9	6	0	0	0	0	33	0	100	12	42	41	41.5	8.25	472	1.57333
Verboort	1012	Duke	5	4	5	10	6	0	0	0	0	25	0	100	18	44	47	45.5	6.25	472	1.57333
Verboort	1012	Duke	6	7	8	4	4	0	0	0	0	23	0	100	22	25	40	32.5	5.75	472	1.57333
Verboort	1012	Duke	7	7	8	6	7	0	0	0	0	28	0	100	19	55	61	58	7	472	1.57333
Verboort	1012	Duke	8	7	6	8	6	0	0	0	0	27	0	100	17	44	43	43.5	6.75	472	1.57333
Verboort	1012	Duke	9	6	6	6	3	0	0	0	0	21	0	100	18	76	90	83	5.25	472	1.57333
Verboort	1012	Duke	10	5	8	6	7	1	0	1	0	26	2	92.8571	7	149	79	114	6.5	472	1.57333
Verboort	1012	Duke	11	7	7	7	8	0	0	0	0	29	0	100	15	38	81	59.5	7.25	472	1.57333
Verboort	1012	Duke	12	7	7	9	8	0	0	0	1	31	1	96.875	32	41	100	70.5	7.75	472	1.57333
Verboort	1012	Duke	13	7	6	5	5	0	0	0	0	23	0	100	5	33	101	67	5.75	472	1.57333
Verboort	1012	Duke	14	11	6	9	8	0	0	0	0	34	0	100	24	123	78	100.5	8.5	472	1.57333
Verboort	1012	Duke	15	7	5	7	6	0	0	0	0	25	0	100	14	45	38	41.5	6.25	472	1.57333
Verboort	1012	Duke	16	4	6	6	7	0	0	1	0	23	1	95.8333	18	82	46	64	5.75	472	1.57333
Verboort	1012	Duke	17	7	7	3	7	0	0	0	0	24	0	100	17	15	41	28	6	472	1.57333
Verboort	1012	Duke	18	4	7	8	8	0	0	0	0	27	0	100	16	45	42	43.5	6.75	472	1.57333
Verboort	1012	Duke	19	6	4	7	9	0	0	0	0	26	0	100	15	88	65	76.5	6.5	472	1.57333
Verboort	1012	Duke	20	7	5	7	7	0	0	0	0	26	0	100	13	86	104	95	6.5	472	1.57333
Verboort	1012	Duke	21	5	6	6	4	2	0	1	0	21	3	87.5	8	43	80	61.5	5.25	472	1.57333
Verboort	1012	Duke	22	5	5	9	8	0	0	0	0	27	0	100	23	65	72	68.5	6.75	472	1.57333
Verboort	1012	Duke	23	6	7	6	8	0	0	0	0	27	0	100	15	48	98	73	6.75	472	1.57333
Verboort	1012	Duke	24	6	7	5	6	0	0	1	0	24	1	96	9	210	48	129	6	472	1.57333
Verboort	1012	Duke	25	5	6	6	6	0	0	0	0	23	0	100	14	103	57	80	5.75	472	1.57333
Verboort	1012	Duke	26	5	7	4	8	0	0	0	0	24	0	100	22	78	90	84	6	472	1.57333
Verboort	1012	Duke	27	11	5	8	8	0	0	0	0	32	0	100	10	63	20	41.5	8	472	1.57333
Verboort	1012	Duke	28	9	7	5	5	0	0	0	1	26	1	96.2963	24	39	86	62.5	6.5	472	1.57333
Verboort	1012	Duke	29	7	2	8	6	0	1	0	0	23	1	95.8333	10	56	72	64	5.75	472	1.57333
Verboort	1012	Duke	30	8	9	7	6	0	0	0	0	30	0	100	18	35	62	48.5	7.5	472	1.57333
Verboort	1011	Liberty	1	7	8	5	6	0	0	0	1	26	1	96.2963	6	212	155	183.5	6.5	410	1.36667
Verboort	1011	Liberty	2	6	8	9	5	0	0	0	0	28	0	100	7	30	50	40	7	410	1.36667
Verboort	1011	Liberty	3	7	4	5	5	0	0	0	0	21	0	100	7	134	51	92.5	5.25	410	1.36667
Verboort	1011	Liberty	4	8	6	6	8	0	0	0	0	28	0	100	8	48	6	27	7	410	1.36667
Verboort	1011	Liberty	5	5	8	9	7	2	0	0	0	29	2	93.5484	9	265	59	162	7.25	410	1.36667
Verboort	1011	Liberty	6	7	5	8	9	0	0	0	0	29	0	100	9	97	162	129.5	7.25	410	1.36667
Verboort	1011	Liberty	7	5	7	9	9	0	0	0	0	30	0	100	14	139	100	119.5	7.5	410	1.36667
Verboort	1011	Liberty	8	8	2	9	4	1	5	0	0	23	6	79.3103	10	129	61	95	5.75	410	1.36667
Verboort	1011	Liberty	9	9	11	9	8	1	0	0	0	37	1	97.3684	9	65	45	55	9.25	410	1.36667
Verboort	1011	Liberty	10	4	10	5	7	0	0	3	0	26	3	89.6552	7	175	284	229.5	6.5	410	1.36667
Verboort	1011	Liberty	11	8	5	6	6	0	3	0	1	25	4	86.2069	11	132	40	86	6.25	410	1.36667
Verboort	1011	Liberty	12	6	6	8	10	1	0	0	0	30	1	96.7742	9	96	67	81.5	7.5	410	1.36667
Verboort	1011	Liberty	13	7	6	6	7	2	0	1	0	26	3	89.6552	8	135	116	125.5	6.5	410	1.36667
Verboort	1011	Liberty	14	3	11	10	10	0	0	0	0	34	0	100	7	15	181	98	8.5	410	1.36667
Verboort	1011	Liberty	15	5	6	2	8	0	0	2	0	21	2	91.3043	9	102	16	59	5.25	410	1.36667
Verboort	1011	Liberty	16	5	6	10	7	0	1	0	0	28	1	96.5517	7	12	93	52.5	7	410	1.36667
Verboort	1011	Liberty	17	7	5	11	10	0	0	0	0	33	0	100	8	84	52	68	8.25	410	1.36667
Verboort	1011	Liberty	18	2	8	10	7	0	0	0	0	27	0	100	8	168	71	119.5	6.75	410	1.36667
Verboort	1011	Liberty	19	7	7	7	7	0	0	0	0	28	0	100	10	33	122	77.5	7	410	1.36667
Verboort	1011	Liberty	20	6	7	7	9	1	0	0	0	29	1	96.6667	14	144	90	117	7.25	410	1.36667
Verboort	1011	Liberty	21	7	8	9	7	1	1	0	0	31	2	93.9394	7	58	165	111.5	7.75	410	1.36667
Verboort	1011	Liberty	22	10	5	4	7	0	1	0	0	26	1	96.2963	6	130	41	85.5	6.5	410	1.36667
Verboort	1011	Liberty	23	8	6	8	7	0	0	0	0	29	0	100	5	43	123	83	7.25	410	1.36667
Verboort	1011	Liberty	24	8	6	5	3	0	0	0	1	22	1	95.6522	4	120	79	99.5	5.5	410	1.36667
Verboort	1011	Liberty	25	6	7	6	7	0	0	0	0	26	0	100	13	168	105	136.5	6.5	410	1.36667
Verboort	1011	Liberty	26	5	10	12	2	0	0	0	3	29	3	90.625	7	121	70	95.5	7.25	410	1.36667
Verboort	1011	Liberty	27	7	8	7	9	0	0	0	0	31	0	100	10	200	149	174.5	7.75	410	1.36667
Verboort	1011	Liberty	28	8	5	4	7	0	0	0	0	24	0	100	5	101	86	93.5	6	410	1.36667
Verboort	1011	Liberty	29	12	5	11	6	0	0	0	0	34	0	100	7	115	104	109.5	8.5	410	1.36667
Verboort	1011	Liberty	30	8	7	10	6	0	0	0	0	31	0	100	8	172	55	113.5	7.75	410	1.36667
PanAm	474	Liberty	1	9	8	5	7	0	0	0	0	29	0	100	19	68	45	56.5	7.25	482	1.60667
PanAm	474	Liberty	2	1	3	5	4	0	0	0	0	13	0	100	18	81	46	63.5	3.25	482	1.60667
PanAm	474	Liberty	3	8	6	9	4	0	0	0	0	27	0	100	23	43	32	37.5	6.75	482	1.60667
PanAm	474	Liberty	4	6	6	8	6	0	0	0	0	26	0	100	24	42	32	37	6.5	482	1.60667
PanAm	474	Liberty	5	6	6	1	4	0	2	0	0	17	2	89.4737	29	75	62	68.5	4.25	482	1.60667
PanAm	474	Liberty	6	7	8	3	6	0	1	0	0	24	1	96	18	14	98	56	6	482	1.60667
PanAm	474	Liberty	7	5	1	7	4	0	0	0	0	17	0	100	24	65	42	53.5	4.25	482	1.60667
PanAm	474	Liberty	8	6	5	3	13	0	0	0	0	27	0	100	22	44	69	56.5	6.75	482	1.60667
PanAm	474	Liberty	9	5	6	5	3	0	1	0	0	19	1	95	17	64	103	83.5	4.75	482	1.60667
PanAm	474	Liberty	10	9	10	5	3	0	0	1	1	27	2	93.1034	21	92	135	113.5	6.75	482	1.60667
PanAm	474	Liberty	11	4	8	11	5	0	0	0	1	28	1	96.5517	31	77	84	80.5	7	482	1.60667
PanAm	474	Liberty	12	3	7	11	7	0	0	0	0	28	0	100	27	44	117	80.5	7	482	1.60667
PanAm	474	Liberty	13	5	6	9	9	0	0	0	0	29	0	100	19	98	91	94.5	7.25	482	1.60667
PanAm	474	Liberty	14	2	4	6	4	0	1	0	0	16	1	94.1176	31	81	19	50	4	482	1.60667
PanAm	474	Liberty	15	4	11	11	6	1	0	0	0	32	1	96.9697	28	41	78	59.5	8	482	1.60667
PanAm	474	Liberty	16	9	7	6	6	0	0	0	0	28	0	100	16	137	154	145.5	7	482	1.60667
PanAm	474	Liberty	17	4	5	10	4	0	0	0	0	23	0	100	26	73	35	54	5.75	482	1.60667
PanAm	474	Liberty	18	5	6	6	8	0	0	0	0	25	0	100	24	120	150	135	6.25	482	1.60667
PanAm	474	Liberty	19	7	3	6	9	0	0	0	0	25	0	100	20	122	45	83.5	6.25	482	1.60667
PanAm	474	Liberty	20	3	2	6	7	0	0	0	1	18	1	94.7368	16	34	94	64	4.5	482	1.60667
PanAm	474	Liberty	21	3	5	3	6	2	1	0	0	17	3	85	24	91	42	66.5	4.25	482	1.60667
PanAm	474	Liberty	22	8	9	6	7	0	0	0	0	30	0	100	21	31	48	39.5	7.5	482	1.60667
PanAm	474	Liberty	23	1	5	7	8	1	0	1	0	21	2	91.3043	17	122	103	112.5	5.25	482	1.60667
PanAm	474	Liberty	24	5	7	12	8	0	0	0	1	32	1	96.9697	23	80	36	58	8	482	1.60667
PanAm	474	Liberty	25	6	3	11	5	0	2	0	0	25	2	92.5926	22	78	62	70	6.25	482	1.60667
PanAm	474	Liberty	26	4	6	7	4	1	0	0	1	21	2	91.3043	11	54	48	51	5.25	482	1.60667
PanAm	474	Liberty	27	7	4	8	11	0	0	0	0	30	0	100	22	70	82	76	7.5	482	1.60667
PanAm	474	Liberty	28	7	8	9	9	0	0	0	0	33	0	100	27	20	143	81.5	8.25	482	1.60667
PanAm	474	Liberty	29	10	3	8	8	1	4	1	0	29	6	82.8571	21	62	94	78	7.25	482	1.60667
PanAm	474	Liberty	30	11	6	7	2	1	0	0	1	26	2	92.8571	32	25	11	18	6.5	482	1.60667
PanAm	473	Duke	1	11	8	7	16	0	1	1	3	42	5	89.3617	16	6	11	8.5	10.5	620	2.06667
PanAm	473	Duke	2	16	11	11	10	2	2	1	0	48	5	90.566	13	14	13	13.5	12	620	2.06667
PanAm	473	Duke	3	8	12	8	9	1	1	3	2	37	7	84.0909	18	10	6	8	9.25	620	2.06667
PanAm	473	Duke	4	9	6	13	9	1	0	3	0	37	4	90.2439	26	9	6	7.5	9.25	620	2.06667
PanAm	473	Duke	5	7	8	5	10	1	0	2	2	30	5	85.7143	10	15	22	18.5	7.5	620	2.06667
PanAm	473	Duke	6	13	10	9	12	2	2	2	1	44	7	86.2745	28	24	19	21.5	11	620	2.06667
PanAm	473	Duke	7	11	9	11	8	2	0	1	0	39	3	92.8571	25	4	21	12.5	9.75	620	2.06667
PanAm	473	Duke	8	9	6	11	7	1	0	2	1	33	4	89.1892	19	11	39	25	8.25	620	2.06667
PanAm	473	Duke	9	7	12	13	11	0	2	1	0	43	3	93.4783	18	5	8	6.5	10.75	620	2.06667
PanAm	473	Duke	10	13	7	9	6	2	0	2	2	35	6	85.3659	15	36	25	30.5	8.75	620	2.06667
PanAm	473	Duke	11	8	11	7	8	1	0	0	1	34	2	94.4444	19	19	26	22.5	8.5	620	2.06667
PanAm	473	Duke	12	6	7	13	10	2	1	2	1	36	6	85.7143	26	6	12	9	9	620	2.06667
PanAm	473	Duke	13	10	5	8	18	0	0	1	2	41	3	93.1818	24	41	10	25.5	10.25	620	2.06667
PanAm	473	Duke	14	8	7	11	9	0	1	2	1	35	4	89.7436	20	13	22	17.5	8.75	620	2.06667
PanAm	473	Duke	15	10	6	8	5	0	1	0	1	29	2	93.5484	27	36	25	30.5	7.25	620	2.06667
PanAm	473	Duke	16	11	10	8	9	0	1	2	0	38	3	92.6829	18	32	44	38	9.5	620	2.06667
PanAm	473	Duke	17	10	8	6	9	0	1	0	1	33	2	94.2857	26	18	22	20	8.25	620	2.06667
PanAm	473	Duke	18	6	10	7	6	0	0	0	0	29	0	100	20	26	44	35	7.25	620	2.06667
PanAm	473	Duke	19	4	2	8	7	0	0	1	0	21	1	95.4545	18	33	28	30.5	5.25	620	2.06667
PanAm	473	Duke	20	7	8	9	6	1	0	0	0	30	1	96.7742	22	38	26	32	7.5	620	2.06667
PanAm	473	Duke	21	8	11	10	7	1	0	0	0	36	1	97.2973	23	28	39	33.5	9	620	2.06667
PanAm	473	Duke	22	9	8	7	7	0	0	0	0	31	0	100	22	21	19	20	7.75	620	2.06667
PanAm	473	Duke	23	4	9	9	11	0	1	0	0	33	1	97.0588	24	23	31	27	8.25	620	2.06667
PanAm	473	Duke	24	6	6	5	2	0	0	0	0	19	0	100	17	30	19	24.5	4.75	620	2.06667
PanAm	473	Duke	25	4	9	8	9	1	0	0	1	30	2	93.75	31	33	41	37	7.5	620	2.06667
PanAm	473	Duke	26	7	6	5	3	0	1	0	0	21	1	95.4545	17	7	13	10	5.25	620	2.06667
PanAm	473	Duke	27	11	12	6	6	1	2	0	1	35	4	89.7436	26	12	36	24	8.75	620	2.06667
PanAm	473	Duke	28	8	11	9	5	1	0	1	0	33	2	94.2857	7	22	21	21.5	8.25	620	2.06667
PanAm	473	Duke	29	6	8	5	8	1	0	0	0	27	1	96.4286	13	9	22	15.5	6.75	620	2.06667
PanAm	473	Duke	30	9	8	6	5	2	0	0	0	28	2	93.3333	12	15	22	18.5	7	620	2.06667
LM	838	Duke	1	5	7	6	8	0	0	0	0	26	0	100	18	41	34	37.5	6.5	583	1.94333
LM	838	Duke	2	6	5	7	5	0	0	0	0	23	0	100	13	22	7	14.5	5.75	583	1.94333
LM	838	Duke	3	5	4	6	4	2	0	0	1	19	3	86.3636	21	7	42	24.5	4.75	583	1.94333
LM	838	Duke	4	8	7	7	6	0	1	1	0	28	2	93.3333	26	18	55	36.5	7	583	1.94333
LM	838	Duke	5	4	6	8	5	0	0	0	0	23	0	100	20	11	8	9.5	5.75	583	1.94333
LM	838	Duke	6	5	6	7	6	0	1	0	0	24	1	96	9	78	84	81	6	583	1.94333
LM	838	Duke	7	4	5	6	7	0	1	0	0	22	1	95.6522	9	40	27	33.5	5.5	583	1.94333
LM	838	Duke	8	6	3	5	3	0	0	0	2	17	2	89.4737	24	26	44	35	4.25	583	1.94333
LM	838	Duke	9	5	7	6	6	1	0	0	1	24	2	92.3077	16	110	16	63	6	583	1.94333
LM	838	Duke	10	6	7	5	6	0	0	1	0	24	1	96	21	24	26	25	6	583	1.94333
LM	838	Duke	11	5	4	9	7	1	1	0	0	25	2	92.5926	23	72	14	43	6.25	583	1.94333
LM	838	Duke	12	6	6	5	7	0	0	1	0	24	1	96	11	60	174	117	6	583	1.94333
LM	838	Duke	13	4	6	4	5	1	0	0	0	19	1	95	17	59	81	70	4.75	583	1.94333
LM	838	Duke	14	5	9	6	5	0	0	0	0	25	0	100	23	116	107	111.5	6.25	583	1.94333
LM	838	Duke	15	8	9	5	7	0	0	0	0	29	0	100	18	18	53	35.5	7.25	583	1.94333
LM	838	Duke	16	8	5	5	7	1	0	0	0	25	1	96.1538	12	132	16	74	6.25	583	1.94333
LM	838	Duke	17	8	3	7	8	0	0	0	0	26	0	100	14	36	64	50	6.5	583	1.94333
LM	838	Duke	18	10	7	6	6	0	0	0	0	29	0	100	23	106	122	114	7.25	583	1.94333
LM	838	Duke	19	8	3	8	5	0	0	0	0	24	0	100	22	40	42	41	6	583	1.94333
LM	838	Duke	20	2	9	7	8	2	0	0	0	26	2	92.8571	12	23	76	49.5	6.5	583	1.94333
LM	838	Duke	21	6	6	6	3	0	0	0	0	21	0	100	13	44	134	89	5.25	583	1.94333
LM	838	Duke	22	9	5	7	7	0	2	1	0	28	3	90.3226	21	63	126	94.5	7	583	1.94333
LM	838	Duke	23	8	4	3	7	1	2	1	0	22	4	84.6154	20	49	60	54.5	5.5	583	1.94333
LM	838	Duke	24	5	6	4	8	1	1	0	1	23	3	88.4615	18	22	64	43	5.75	583	1.94333
LM	838	Duke	25	6	7	7	8	1	0	0	0	28	1	96.5517	13	84	114	99	7	583	1.94333
LM	838	Duke	26	6	6	5	7	0	0	0	0	24	0	100	16	53	90	71.5	6	583	1.94333
LM	838	Duke	27	4	7	5	2	0	0	0	1	18	1	94.7368	12	56	93	74.5	4.5	583	1.94333
LM	838	Duke	28	7	10	2	9	0	0	0	0	28	0	100	20	42	52	47	7	583	1.94333
LM	838	Duke	29	9	7	7	7	0	0	0	0	30	0	100	17	54	47	50.5	7.5	583	1.94333
LM	838	Duke	30	5	8	7	7	1	0	0	0	27	1	96.4286	9	35	49	42	6.75	583	1.94333
Forest Hills	405	Duke	1	5	7	6	6	0	0	0	0	24	0	100	15	19	44	31.5	6	590	1.96667
Forest Hills	405	Duke	2	6	6	7	8	0	0	0	1	27	1	96.4286	11	96	17	56.5	6.75	590	1.96667
Forest Hills	405	Duke	3	6	6	3	14	0	0	0	0	29	0	100	17	47	28	37.5	7.25	590	1.96667
Forest Hills	405	Duke	4	7	8	8	7	0	0	0	1	30	1	96.7742	16	64	17	40.5	7.5	590	1.96667
Forest Hills	405	Duke	5	8	5	8	8	2	0	0	0	29	2	93.5484	11	61	97	79	7.25	590	1.96667
Forest Hills	405	Duke	6	2	8	7	9	2	0	0	0	26	2	92.8571	11	32	116	74	6.5	590	1.96667
Forest Hills	405	Duke	7	7	4	7	7	0	0	0	1	25	1	96.1538	21	27	6	16.5	6.25	590	1.96667
Forest Hills	405	Duke	8	8	11	3	7	0	0	0	1	29	1	96.6667	13	112	41	76.5	7.25	590	1.96667
Forest Hills	405	Duke	9	4	7	6	5	1	2	0	0	22	3	88	17	57	62	59.5	5.5	590	1.96667
Forest Hills	405	Duke	10	8	7	9	7	0	0	0	0	31	0	100	14	31	25	28	7.75	590	1.96667
Forest Hills	405	Duke	11	8	10	6	6	0	0	1	0	30	1	96.7742	10	29	32	30.5	7.5	590	1.96667
Forest Hills	405	Duke	12	6	10	6	5	0	1	0	0	27	1	96.4286	10	64	89	76.5	6.75	590	1.96667
Forest Hills	405	Duke	13	6	5	6	9	0	0	0	0	26	0	100	14	10	63	36.5	6.5	590	1.96667
Forest Hills	405	Duke	14	7	10	10	5	0	0	0	0	32	0	100	10	55	42	48.5	8	590	1.96667
Forest Hills	405	Duke	15	6	9	7	4	0	0	0	1	26	1	96.2963	11	48	71	59.5	6.5	590	1.96667
Forest Hills	405	Duke	16	12	6	5	8	0	0	0	0	31	0	100	12	88	105	96.5	7.75	590	1.96667
Forest Hills	405	Duke	17	8	7	7	5	1	1	0	0	27	2	93.1034	13	117	26	71.5	6.75	590	1.96667
Forest Hills	405	Duke	18	7	7	5	1	0	0	0	1	20	1	95.2381	12	25	26	25.5	5	590	1.96667
Forest Hills	405	Duke	19	8	5	12	7	0	0	0	1	32	1	96.9697	11	93	12	52.5	8	590	1.96667
Forest Hills	405	Duke	20	6	8	7	7	0	0	0	0	28	0	100	11	17	81	49	7	590	1.96667
Forest Hills	405	Duke	21	7	5	7	6	1	0	0	0	25	1	96.1538	11	44	17	30.5	6.25	590	1.96667
Forest Hills	405	Duke	22	7	8	4	8	0	1	0	0	27	1	96.4286	10	54	83	68.5	6.75	590	1.96667
Forest Hills	405	Duke	23	7	5	5	9	0	0	1	1	26	2	92.8571	11	9	87	48	6.5	590	1.96667
Forest Hills	405	Duke	24	8	5	7	5	0	0	1	0	25	1	96.1538	9	13	74	43.5	6.25	590	1.96667
Forest Hills	405	Duke	25	6	10	7	6	0	0	0	1	29	1	96.6667	10	71	73	72	7.25	590	1.96667
Forest Hills	405	Duke	26	7	8	7	6	0	1	1	1	28	3	90.3226	9	80	67	73.5	7	590	1.96667
Forest Hills	405	Duke	27	8	6	7	6	1	1	0	1	27	3	90	3	118	26	72	6.75	590	1.96667
Forest Hills	405	Duke	28	8	10	7	8	0	0	0	1	33	1	97.0588	10	51	63	57	8.25	590	1.96667
Forest Hills	405	Duke	29	7	8	5	5	1	0	0	2	25	3	89.2857	17	99	16	57.5	6.25	590	1.96667
Forest Hills	405	Duke	30	7	5	9	12	0	0	0	0	33	0	100	16	86	105	95.5	8.25	590	1.96667
Five Oaks	984	Duke	1	4	6	6	7	0	0	0	0	23	0	100	8	17	42	29.5	5.75	502	1.67333
Five Oaks	984	Duke	2	7	13	8	10	0	0	0	1	38	1	97.4359	14	24	39	31.5	9.5	502	1.67333
Five Oaks	984	Duke	3	5	6	8	8	1	0	0	0	27	1	96.4286	11	24	31	27.5	6.75	502	1.67333
Five Oaks	984	Duke	4	8	8	10	5	0	0	1	0	31	1	96.875	11	22	17	19.5	7.75	502	1.67333
Five Oaks	984	Duke	5	5	7	4	5	0	0	0	0	21	0	100	6	6	8	7	5.25	502	1.67333
Five Oaks	984	Duke	6	1	9	7	8	2	0	0	0	25	2	92.5926	12	3	24	13.5	6.25	502	1.67333
Five Oaks	984	Duke	7	9	11	10	8	0	1	0	0	38	1	97.4359	9	62	45	53.5	9.5	502	1.67333
Five Oaks	984	Duke	8	4	5	7	9	0	0	0	0	25	0	100	16	17	29	23	6.25	502	1.67333
Five Oaks	984	Duke	9	5	6	6	9	0	0	0	1	26	1	96.2963	18	81	62	71.5	6.5	502	1.67333
Five Oaks	984	Duke	10	6	6	8	3	0	0	1	0	23	1	95.8333	14	44	27	35.5	5.75	502	1.67333
Five Oaks	984	Duke	11	5	9	4	8	0	0	0	0	26	0	100	7	18	16	17	6.5	502	1.67333
Five Oaks	984	Duke	12	4	7	8	7	0	0	0	3	26	3	89.6552	8	22	63	42.5	6.5	502	1.67333
Five Oaks	984	Duke	13	6	8	7	8	0	0	0	1	29	1	96.6667	9	45	22	33.5	7.25	502	1.67333
Five Oaks	984	Duke	14	5	5	4	7	0	0	0	0	21	0	100	14	18	23	20.5	5.25	502	1.67333
Five Oaks	984	Duke	15	8	6	6	7	0	0	1	0	27	1	96.4286	10	59	12	35.5	6.75	502	1.67333
Five Oaks	984	Duke	16	8	7	3	6	0	1	0	0	24	1	96	13	28	19	23.5	6	502	1.67333
Five Oaks	984	Duke	17	8	7	4	9	0	0	0	1	28	1	96.5517	7	35	7	21	7	502	1.67333
Five Oaks	984	Duke	18	5	5	7	9	0	1	0	0	26	1	96.2963	8	20	19	19.5	6.5	502	1.67333
Five Oaks	984	Duke	19	7	7	5	5	0	0	0	2	24	2	92.3077	7	41	53	47	6	502	1.67333
Five Oaks	984	Duke	20	7	7	8	5	0	0	1	1	27	2	93.1034	16	31	44	37.5	6.75	502	1.67333
Five Oaks	984	Duke	21	9	8	8	6	0	0	1	0	31	1	96.875	10	46	8	27	7.75	502	1.67333
Five Oaks	984	Duke	22	4	5	5	7	1	0	0	0	21	1	95.4545	17	43	25	34	5.25	502	1.67333
Five Oaks	984	Duke	23	8	7	5	4	1	0	0	1	24	2	92.3077	18	39	38	38.5	6	502	1.67333
Five Oaks	984	Duke	24	4	4	5	5	1	0	0	1	18	2	90	12	26	9	17.5	4.5	502	1.67333
Five Oaks	984	Duke	25	8	8	7	6	0	0	1	0	29	1	96.6667	14	54	61	57.5	7.25	502	1.67333
Five Oaks	984	Duke	26	4	7	7	8	0	0	0	1	26	1	96.2963	31	96	80	88	6.5	502	1.67333
Five Oaks	984	Duke	27	6	6	4	7	0	1	0	0	23	1	95.8333	10	16	66	41	5.75	502	1.67333
Five Oaks	984	Duke	28	13	9	11	10	1	0	0	0	43	1	97.7273	13	27	88	57.5	10.75	502	1.67333
Five Oaks	984	Duke	29	7	10	10	4	0	0	0	0	31	0	100	15	21	7	14	7.75	502	1.67333
Five Oaks	984	Duke	30	5	8	9	5	0	1	0	0	27	1	96.4286	18	34	57	45.5	6.75	502	1.67333
Five Oaks	983	Duke	1	7	7	8	5	1	0	0	0	27	1	96.4286	7	26	22	24	6.75	479	1.59667
Five Oaks	983	Duke	2	5	6	7	7	0	0	0	0	25	0	100	13	11	41	26	6.25	479	1.59667
Five Oaks	983	Duke	3	6	5	7	3	0	0	0	2	21	2	91.3043	18	51	19	35	5.25	479	1.59667
Five Oaks	983	Duke	4	7	9	2	4	1	0	1	0	22	2	91.6667	8	16	26	21	5.5	479	1.59667
Five Oaks	983	Duke	5	6	6	2	4	1	0	0	0	18	1	94.7368	9	28	44	36	4.5	479	1.59667
Five Oaks	983	Duke	6	4	6	9	11	0	0	0	0	30	0	100	15	21	19	20	7.5	479	1.59667
Five Oaks	983	Duke	7	7	9	5	7	0	0	0	0	28	0	100	10	32	61	46.5	7	479	1.59667
Five Oaks	983	Duke	8	5	7	9	8	0	1	0	0	29	1	96.6667	6	46	20	33	7.25	479	1.59667
Five Oaks	983	Duke	9	7	6	8	9	0	0	0	1	30	1	96.7742	13	13	41	27	7.5	479	1.59667
Five Oaks	983	Duke	10	5	8	7	9	0	0	1	0	29	1	96.6667	16	62	19	40.5	7.25	479	1.59667
Five Oaks	983	Duke	11	7	8	5	9	0	0	0	1	29	1	96.6667	9	7	21	14	7.25	479	1.59667
Five Oaks	983	Duke	12	6	5	7	7	1	0	0	0	25	1	96.1538	10	40	26	33	6.25	479	1.59667
Five Oaks	983	Duke	13	6	7	7	9	0	0	0	0	29	0	100	8	11	14	12.5	7.25	479	1.59667
Five Oaks	983	Duke	14	9	7	7	8	0	1	0	0	31	1	96.875	12	31	9	20	7.75	479	1.59667
Five Oaks	983	Duke	15	5	7	7	9	1	0	0	0	28	1	96.5517	4	54	60	57	7	479	1.59667
Five Oaks	983	Duke	16	8	9	9	7	0	0	0	0	33	0	100	17	21	33	27	8.25	479	1.59667
Five Oaks	983	Duke	17	7	8	5	8	0	0	1	0	28	1	96.5517	14	8	52	30	7	479	1.59667
Five Oaks	983	Duke	18	9	7	6	7	0	0	0	0	29	0	100	8	18	11	14.5	7.25	479	1.59667
Five Oaks	983	Duke	19	7	7	6	7	0	0	0	0	27	0	100	5	17	37	27	6.75	479	1.59667
Five Oaks	983	Duke	20	2	1	4	8	0	3	0	0	15	3	83.3333	15	9	21	15	3.75	479	1.59667
Five Oaks	983	Duke	21	5	8	5	8	0	0	1	0	26	1	96.2963	21	16	33	24.5	6.5	479	1.59667
Five Oaks	983	Duke	22	13	5	7	6	0	0	0	0	31	0	100	18	19	21	20	7.75	479	1.59667
Five Oaks	983	Duke	23	7	11	8	11	0	0	0	1	37	1	97.3684	10	20	44	32	9.25	479	1.59667
Five Oaks	983	Duke	24	6	6	7	4	0	0	0	0	23	0	100	10	61	45	53	5.75	479	1.59667
Five Oaks	983	Duke	25	8	7	7	11	0	0	0	1	33	1	97.0588	12	56	72	64	8.25	479	1.59667
Five Oaks	983	Duke	26	6	6	8	7	0	0	0	0	27	0	100	13	40	22	31	6.75	479	1.59667
Five Oaks	983	Duke	27	7	7	5	8	0	0	1	0	27	1	96.4286	17	22	31	26.5	6.75	479	1.59667
Five Oaks	983	Duke	28	8	6	8	7	0	0	0	0	29	0	100	27	36	23	29.5	7.25	479	1.59667
Five Oaks	983	Duke	29	8	11	7	8	0	1	0	0	34	1	97.1429	5	50	41	45.5	8.5	479	1.59667
Five Oaks	983	Duke	30	7	7	6	9	0	0	0	0	29	0	100	11	44	36	40	7.25	479	1.59667
Eden	1032	Liberty	1	5	8	6	10	0	0	1	0	29	1	96.6667	18	46	27	36.5	7.25	526	1.75333
Eden	1032	Liberty	2	7	8	7	11	0	0	1	0	33	1	97.0588	18	33	12	22.5	8.25	526	1.75333
Eden	1032	Liberty	3	8	10	13	6	0	2	0	0	37	2	94.8718	19	44	61	52.5	9.25	526	1.75333
Eden	1032	Liberty	4	6	7	9	8	1	0	0	0	30	1	96.7742	15	17	32	24.5	7.5	526	1.75333
Eden	1032	Liberty	5	7	8	6	4	0	0	0	1	25	1	96.1538	16	22	55	38.5	6.25	526	1.75333
Eden	1032	Liberty	6	7	8	9	6	0	0	0	1	30	1	96.7742	22	31	33	32	7.5	526	1.75333
Eden	1032	Liberty	7	8	9	7	10	0	0	0	0	34	0	100	16	32	54	43	8.5	526	1.75333
Eden	1032	Liberty	8	7	9	9	6	1	0	0	0	31	1	96.875	17	20	36	28	7.75	526	1.75333
Eden	1032	Liberty	9	7	4	4	3	0	0	0	0	18	0	100	21	24	16	20	4.5	526	1.75333
Eden	1032	Liberty	10	9	5	6	6	1	0	0	0	26	1	96.2963	23	20	23	21.5	6.5	526	1.75333
Eden	1032	Liberty	11	9	9	9	7	0	0	0	0	34	0	100	15	27	68	47.5	8.5	526	1.75333
Eden	1032	Liberty	12	8	9	8	9	0	2	1	0	34	3	91.8919	11	4	22	13	8.5	526	1.75333
Eden	1032	Liberty	13	7	7	7	2	0	0	0	2	23	2	92	13	19	31	25	5.75	526	1.75333
Eden	1032	Liberty	14	8	8	12	11	2	0	0	0	39	2	95.122	19	54	39	46.5	9.75	526	1.75333
Eden	1032	Liberty	15	8	7	8	8	0	1	0	0	31	1	96.875	19	61	55	58	7.75	526	1.75333
Eden	1032	Liberty	16	8	5	6	7	0	2	0	0	26	2	92.8571	15	29	10	19.5	6.5	526	1.75333
Eden	1032	Liberty	17	8	5	5	6	0	2	0	0	24	2	92.3077	15	30	46	38	6	526	1.75333
Eden	1032	Liberty	18	10	10	4	4	1	0	0	0	28	1	96.5517	7	40	31	35.5	7	526	1.75333
Eden	1032	Liberty	19	11	10	10	9	1	0	0	0	40	1	97.561	18	22	13	17.5	10	526	1.75333
Eden	1032	Liberty	20	10	11	9	11	3	0	0	0	41	3	93.1818	13	45	33	39	10.25	526	1.75333
Eden	1032	Liberty	21	9	7	6	8	1	0	0	0	30	1	96.7742	15	66	71	68.5	7.5	526	1.75333
Eden	1032	Liberty	22	7	6	9	7	0	3	0	0	29	3	90.625	14	44	53	48.5	7.25	526	1.75333
Eden	1032	Liberty	23	7	6	4	7	0	0	0	0	24	0	100	21	40	19	29.5	6	526	1.75333
Eden	1032	Liberty	24	6	5	7	6	0	1	0	0	24	1	96	14	32	33	32.5	6	526	1.75333
Eden	1032	Liberty	25	6	7	9	9	0	0	0	1	31	1	96.875	18	44	31	37.5	7.75	526	1.75333
Eden	1032	Liberty	26	8	3	9	9	0	0	0	0	29	0	100	14	51	42	46.5	7.25	526	1.75333
Eden	1032	Liberty	27	8	6	5	9	0	0	1	0	28	1	96.5517	16	33	65	49	7	526	1.75333
Eden	1032	Liberty	28	9	9	8	7	0	1	0	0	33	1	97.0588	16	45	56	50.5	8.25	526	1.75333
Eden	1032	Liberty	29	9	7	7	9	1	0	0	1	32	2	94.1176	15	71	23	47	8	526	1.75333
Eden	1032	Liberty	30	6	6	9	11	0	0	0	0	32	0	100	14	36	40	38	8	526	1.75333
Eden	267	Duke	1	9	5	10	9	0	0	0	0	33	0	100	22	29	36	32.5	8.25	517	1.72333
Eden	267	Duke	2	9	7	6	11	0	0	0	1	33	1	97.0588	21	73	81	77	8.25	517	1.72333
Eden	267	Duke	3	10	8	6	9	0	0	1	0	33	1	97.0588	35	42	35	38.5	8.25	517	1.72333
Eden	267	Duke	4	7	6	9	10	0	0	1	0	32	1	96.9697	12	45	21	33	8	517	1.72333
Eden	267	Duke	5	7	8	7	10	0	0	0	0	32	0	100	15	23	45	34	8	517	1.72333
Eden	267	Duke	6	5	7	9	7	2	0	0	0	28	2	93.3333	11	13	22	17.5	7	517	1.72333
Eden	267	Duke	7	8	6	6	5	0	0	0	0	25	0	100	26	41	40	40.5	6.25	517	1.72333
Eden	267	Duke	8	9	11	10	8	0	0	0	0	38	0	100	15	27	31	29	9.5	517	1.72333
Eden	267	Duke	9	8	8	8	7	0	0	0	0	31	0	100	11	33	12	22.5	7.75	517	1.72333
Eden	267	Duke	10	7	7	9	5	0	0	0	0	28	0	100	14	13	38	25.5	7	517	1.72333
Eden	267	Duke	11	11	8	8	5	0	0	0	0	32	0	100	13	35	42	38.5	8	517	1.72333
Eden	267	Duke	12	10	8	7	6	0	0	0	0	31	0	100	12	23	31	27	7.75	517	1.72333
Eden	267	Duke	13	9	9	8	9	0	0	0	0	35	0	100	22	15	40	27.5	8.75	517	1.72333
Eden	267	Duke	14	11	10	7	9	0	0	0	1	37	1	97.3684	15	19	24	21.5	9.25	517	1.72333
Eden	267	Duke	15	8	9	8	7	0	0	0	0	32	0	100	8	45	13	29	8	517	1.72333
Eden	267	Duke	16	8	6	9	9	0	1	0	0	32	1	96.9697	24	20	33	26.5	8	517	1.72333
Eden	267	Duke	17	6	7	8	9	1	0	0	0	30	1	96.7742	14	13	35	24	7.5	517	1.72333
Eden	267	Duke	18	9	8	8	7	1	0	0	0	32	1	96.9697	18	35	27	31	8	517	1.72333
Eden	267	Duke	19	9	5	6	6	0	0	0	0	26	0	100	19	22	21	21.5	6.5	517	1.72333
Eden	267	Duke	20	7	9	6	9	0	0	0	1	31	1	96.875	15	18	26	22	7.75	517	1.72333
Eden	267	Duke	21	9	7	8	8	0	1	0	0	32	1	96.9697	17	31	40	35.5	8	517	1.72333
Eden	267	Duke	22	8	8	9	6	0	0	0	0	31	0	100	24	14	25	19.5	7.75	517	1.72333
Eden	267	Duke	23	8	11	7	8	0	0	0	0	34	0	100	19	19	36	27.5	8.5	517	1.72333
Eden	267	Duke	24	6	13	5	9	1	0	0	0	33	1	97.0588	17	29	37	33	8.25	517	1.72333
Eden	267	Duke	25	9	7	6	11	0	0	0	0	33	0	100	12	37	47	42	8.25	517	1.72333
Eden	267	Duke	26	5	7	7	13	0	0	0	0	32	0	100	16	21	30	25.5	8	517	1.72333
Eden	267	Duke	27	11	8	11	9	0	0	0	1	39	1	97.5	10	36	48	42	9.75	517	1.72333
Eden	267	Duke	28	7	9	9	7	0	1	0	0	32	1	96.9697	21	66	32	49	8	517	1.72333
Eden	267	Duke	29	9	6	13	8	0	0	0	0	36	0	100	15	24	51	37.5	9	517	1.72333
Eden	267	Duke	30	9	9	8	9	0	0	0	0	35	0	100	17	48	32	40	8.75	517	1.72333
Casale	1193	Duke	1	5	7	5	7	0	0	0	0	24	0	100	5	157	184	170.5	6	511	1.70333
Casale	1193	Duke	2	7	6	4	6	0	0	0	0	23	0	100	3	159	64	111.5	5.75	511	1.70333
Casale	1193	Duke	3	7	4	10	7	0	0	0	0	28	0	100	6	239	216	227.5	7	511	1.70333
Casale	1193	Duke	4	5	4	7	7	0	0	0	0	23	0	100	2	172	158	165	5.75	511	1.70333
Casale	1193	Duke	5	6	6	6	7	0	0	0	0	25	0	100	5	89	200	144.5	6.25	511	1.70333
Casale	1193	Duke	6	4	7	7	10	0	0	0	0	28	0	100	6	136	104	120	7	511	1.70333
Casale	1193	Duke	7	2	5	4	7	0	0	1	0	18	1	94.7368	5	54	91	72.5	4.5	511	1.70333
Casale	1193	Duke	8	5	4	9	8	0	0	0	0	26	0	100	4	240	128	184	6.5	511	1.70333
Casale	1193	Duke	9	5	7	7	5	0	1	0	0	24	1	96	6	128	46	87	6	511	1.70333
Casale	1193	Duke	10	6	7	4	10	0	0	0	0	27	0	100	5	24	70	47	6.75	511	1.70333
Casale	1193	Duke	11	7	11	9	5	0	0	0	0	32	0	100	4	205	138	171.5	8	511	1.70333
Casale	1193	Duke	12	6	9	10	5	0	0	0	0	30	0	100	6	68	42	55	7.5	511	1.70333
Casale	1193	Duke	13	8	1	10	11	0	0	0	0	30	0	100	5	109	212	160.5	7.5	511	1.70333
Casale	1193	Duke	14	5	4	4	9	0	0	0	0	22	0	100	5	24	135	79.5	5.5	511	1.70333
Casale	1193	Duke	15	5	9	2	6	0	0	0	0	22	0	100	4	36	53	44.5	5.5	511	1.70333
Casale	1193	Duke	16	12	10	10	7	0	0	0	0	39	0	100	8	19	27	23	9.75	511	1.70333
Casale	1193	Duke	17	10	8	6	5	0	0	0	0	29	0	100	7	68	140	104	7.25	511	1.70333
Casale	1193	Duke	18	7	7	5	1	0	0	0	0	20	0	100	3	63	258	160.5	5	511	1.70333
Casale	1193	Duke	19	3	6	4	10	0	0	0	1	23	1	95.8333	6	180	40	110	5.75	511	1.70333
Casale	1193	Duke	20	12	11	5	3	0	0	0	0	31	0	100	7	31	70	50.5	7.75	511	1.70333
Casale	1193	Duke	21	6	9	6	2	0	0	0	4	23	4	85.1852	5	194	128	161	5.75	511	1.70333
Casale	1193	Duke	22	8	6	8	2	0	0	0	0	24	0	100	8	100	126	113	6	511	1.70333
Casale	1193	Duke	23	6	10	6	3	0	0	0	0	25	0	100	5	131	57	94	6.25	511	1.70333
Casale	1193	Duke	24	6	6	5	9	0	0	0	1	26	1	96.2963	7	115	96	105.5	6.5	511	1.70333
Casale	1193	Duke	25	7	4	4	6	0	0	0	0	21	0	100	4	62	118	90	5.25	511	1.70333
Casale	1193	Duke	26	4	4	11	9	0	0	0	0	28	0	100	5	64	194	129	7	511	1.70333
Casale	1193	Duke	27	5	6	7	5	0	0	0	0	23	0	100	8	176	102	139	5.75	511	1.70333
Casale	1193	Duke	28	6	3	8	6	0	0	0	1	23	1	95.8333	8	302	195	248.5	5.75	511	1.70333
Casale	1193	Duke	29	5	6	5	6	0	0	0	0	22	0	100	6	118	59	88.5	5.5	511	1.70333
Casale	1193	Duke	30	6	6	7	4	0	0	0	2	23	2	92	6	63	125	94	5.75	511	1.70333
Casale	1149	Liberty	1	15	10	13	18	0	0	0	0	56	0	100	11	115	58	86.5	14	715	2.38333
Casale	1149	Liberty	2	7	7	9	5	0	0	0	0	28	0	100	10	83	80	81.5	7	715	2.38333
Casale	1149	Liberty	3	6	4	5	6	0	0	0	0	21	0	100	7	45	62	53.5	5.25	715	2.38333
Casale	1149	Liberty	4	6	7	5	9	0	0	0	0	27	0	100	9	133	185	159	6.75	715	2.38333
Casale	1149	Liberty	5	10	5	9	7	0	0	0	0	31	0	100	11	46	42	44	7.75	715	2.38333
Casale	1149	Liberty	6	12	6	8	8	0	0	0	0	34	0	100	11	160	65	112.5	8.5	715	2.38333
Casale	1149	Liberty	7	13	7	7	7	0	0	0	0	34	0	100	9	171	44	107.5	8.5	715	2.38333
Casale	1149	Liberty	8	2	9	13	6	0	0	1	0	30	1	96.7742	17	74	308	191	7.5	715	2.38333
Casale	1149	Liberty	9	6	12	7	8	1	0	0	0	33	1	97.0588	12	111	44	77.5	8.25	715	2.38333
Casale	1149	Liberty	10	6	3	9	8	0	0	0	0	26	0	100	8	215	211	213	6.5	715	2.38333
Casale	1149	Liberty	11	1	8	6	8	0	0	0	0	23	0	100	13	65	48	56.5	5.75	715	2.38333
Casale	1149	Liberty	12	9	5	14	6	0	0	0	0	34	0	100	11	79	122	100.5	8.5	715	2.38333
Casale	1149	Liberty	13	2	8	5	2	6	2	5	8	17	21	44.7368	8	148	161	154.5	4.25	715	2.38333
Casale	1149	Liberty	14	9	8	7	10	0	1	0	0	34	1	97.1429	5	91	105	98	8.5	715	2.38333
Casale	1149	Liberty	15	7	6	4	4	0	0	0	0	21	0	100	8	87	182	134.5	5.25	715	2.38333
Casale	1149	Liberty	16	11	5	9	7	3	0	0	0	32	3	91.4286	9	65	87	76	8	715	2.38333
Casale	1149	Liberty	17	7	0	4	9	0	4	2	1	20	7	74.0741	3	270	47	158.5	5	715	2.38333
Casale	1149	Liberty	18	5	9	7	8	0	0	0	0	29	0	100	7	110	133	121.5	7.25	715	2.38333
Casale	1149	Liberty	19	8	7	9	6	0	0	0	0	30	0	100	10	45	80	62.5	7.5	715	2.38333
Casale	1149	Liberty	20	8	6	12	10	0	0	0	0	36	0	100	10	96	76	86	9	715	2.38333
Casale	1149	Liberty	21	15	7	18	5	0	0	0	0	45	0	100	8	44	60	52	11.25	715	2.38333
Casale	1149	Liberty	22	9	7	17	9	0	0	0	0	42	0	100	13	34	40	37	10.5	715	2.38333
Casale	1149	Liberty	23	6	12	3	9	0	0	1	0	30	1	96.7742	4	72	135	103.5	7.5	715	2.38333
Casale	1149	Liberty	24	7	5	15	10	0	0	1	0	37	1	97.3684	10	111	155	133	9.25	715	2.38333
Casale	1149	Liberty	25	9	7	8	6	0	0	0	0	30	0	100	10	37	41	39	7.5	715	2.38333
Casale	1149	Liberty	26	7	4	8	13	0	0	0	1	32	1	96.9697	6	120	44	82	8	715	2.38333
Casale	1149	Liberty	27	10	7	14	12	0	2	0	0	43	2	95.5556	6	116	67	91.5	10.75	715	2.38333
Casale	1149	Liberty	28	5	17	9	6	0	0	0	0	37	0	100	5	88	32	60	9.25	715	2.38333
Casale	1149	Liberty	29	5	7	9	4	0	3	0	0	25	3	89.2857	8	22	103	62.5	6.25	715	2.38333
Casale	1149	Liberty	30	10	7	7	8	0	1	0	0	32	1	96.9697	14	40	109	74.5	8	715	2.38333
Angel Valley	547	Duke	1	9	7	6	5	0	0	0	0	27	0	100	10	4	27	15.5	6.75	320	1.06667
Angel Valley	547	Duke	2	7	9	6	7	1	0	0	0	29	1	96.6667	11	21	22	21.5	7.25	320	1.06667
Angel Valley	547	Duke	3	4	7	5	3	0	0	1	0	19	1	95	4	43	31	37	4.75	320	1.06667
Angel Valley	547	Duke	4	8	8	6	5	0	1	0	0	27	1	96.4286	9	19	23	21	6.75	320	1.06667
Angel Valley	547	Duke	5	6	6	3	8	0	0	4	1	23	5	82.1429	11	38	9	23.5	5.75	320	1.06667
Angel Valley	547	Duke	6	7	8	7	7	0	0	0	0	29	0	100	8	32	6	19	7.25	320	1.06667
Angel Valley	547	Duke	7	5	5	4	7	0	0	1	0	21	1	95.4545	6	27	34	30.5	5.25	320	1.06667
Angel Valley	547	Duke	8	4	8	4	6	0	0	0	0	22	0	100	11	6	23	14.5	5.5	320	1.06667
Angel Valley	547	Duke	9	6	3	6	7	0	0	1	0	22	1	95.6522	10	26	11	18.5	5.5	320	1.06667
Angel Valley	547	Duke	10	11	5	3	4	0	0	0	0	23	0	100	5	21	15	18	5.75	320	1.06667
Angel Valley	547	Duke	11	2	6	10	3	3	0	1	0	21	4	84	4	37	19	28	5.25	320	1.06667
Angel Valley	547	Duke	12	6	4	5	5	0	0	0	0	20	0	100	7	13	12	12.5	5	320	1.06667
Angel Valley	547	Duke	13	7	8	6	5	0	0	0	0	26	0	100	7	12	89	50.5	6.5	320	1.06667
Angel Valley	547	Duke	14	5	7	4	3	0	0	0	1	19	1	95	4	33	28	30.5	4.75	320	1.06667
Angel Valley	547	Duke	15	5	7	8	6	0	0	1	0	26	1	96.2963	9	13	42	27.5	6.5	320	1.06667
Angel Valley	547	Duke	16	4	7	7	5	2	0	0	1	23	3	88.4615	6	5	39	22	5.75	320	1.06667
Angel Valley	547	Duke	17	5	5	5	3	0	0	0	1	18	1	94.7368	7	11	61	36	4.5	320	1.06667
Angel Valley	547	Duke	18	7	7	8	5	0	0	0	0	27	0	100	8	19	26	22.5	6.75	320	1.06667
Angel Valley	547	Duke	19	4	5	5	4	0	0	0	0	18	0	100	11	13	21	17	4.5	320	1.06667
Angel Valley	547	Duke	20	5	8	6	2	0	0	0	2	21	2	91.3043	10	13	28	20.5	5.25	320	1.06667
Angel Valley	547	Duke	21	1	5	7	8	2	0	1	0	21	3	87.5	8	28	31	29.5	5.25	320	1.06667
Angel Valley	547	Duke	22	6	6	4	6	0	0	0	0	22	0	100	9	18	31	24.5	5.5	320	1.06667
Angel Valley	547	Duke	23	1	7	4	5	0	0	0	0	17	0	100	7	27	38	32.5	4.25	320	1.06667
Angel Valley	547	Duke	24	7	7	10	6	0	0	0	3	30	3	90.9091	6	21	45	33	7.5	320	1.06667
Angel Valley	547	Duke	25	6	4	6	4	0	0	0	0	20	0	100	10	26	81	53.5	5	320	1.06667
Angel Valley	547	Duke	26	7	6	6	6	0	0	0	0	25	0	100	8	22	15	18.5	6.25	320	1.06667
Angel Valley	547	Duke	27	6	7	6	8	0	1	0	0	27	1	96.4286	7	63	55	59	6.75	320	1.06667
Angel Valley	547	Duke	28	2	2	3	5	1	2	0	1	12	4	75	8	54	12	33	3	320	1.06667
Angel Valley	547	Duke	29	7	7	7	5	4	0	0	0	26	4	86.6667	7	93	41	67	6.5	320	1.06667
Angel Valley	547	Duke	30	6	4	5	7	1	0	0	0	22	1	95.6522	6	40	26	33	5.5	320	1.06667

## Sheet: diseases
Field	Farm	Colony	EFB Severity	Diseases	Bloom	Season	Date	Adult	Queen	Assessment	Brood
Verboort	Farm 1	1	0	0	Early	Beginning	2019-04-21	14.25	1	FIRST	2.25
Verboort	Farm 1	2	1	2	Early	Beginning	2019-04-21	12.95	1	FIRST	6.05
Verboort	Farm 1	3	0	0	Early	Beginning	2019-04-21	7.55	1	FIRST	2.55
Verboort	Farm 1	4	0	0	Early	Beginning	2019-04-21	7.5	1	FIRST	3.5
Verboort	Farm 1	5	0	0	Early	Beginning	2019-04-21	13.15	1	FIRST	5.9
Verboort	Farm 1	6	0	0	Early	Beginning	2019-04-21	15.3	1	FIRST	6.6
Verboort	Farm 1	7	0	0	Early	Beginning	2019-04-21	15.65	1	FIRST	5
Verboort	Farm 1	8	0	0	Early	Beginning	2019-04-21	5.9	1	FIRST	3.7
Verboort	Farm 1	9	0	0	Early	Beginning	2019-04-21	8.25	1	FIRST	6.95
Verboort	Farm 1	10	0	1	Early	Beginning	2019-04-21	6.75	1	FIRST	4.45
Verboort	Farm 1	11	0	0	Early	Beginning	2019-04-21	14.95	1	FIRST	6.75
Verboort	Farm 1	12	0	0	Early	Beginning	2019-04-21	21.9	1	FIRST	7.65
Forest Hills	Farm 2	13	0	1	Early	Beginning	2019-04-21	4.5	1	FIRST	3.2
Forest Hills	Farm 2	14	0	1	Early	Beginning	2019-04-21	3.2	1	FIRST	2.95
Forest Hills	Farm 2	15	0	1	Early	Beginning	2019-04-21	17.45	1	FIRST	3.5
Forest Hills	Farm 2	16	1	2	Early	Beginning	2019-04-21	3.15	1	FIRST	2.95
Forest Hills	Farm 2	17	1	3	Early	Beginning	2019-04-21	5.7	1	FIRST	2.1
Forest Hills	Farm 2	18	0	0	Early	Beginning	2019-04-21	7.5	1	FIRST	1.6
Forest Hills	Farm 2	19	0	0	Early	Beginning	2019-04-21	6.75	1	FIRST	2.45
Forest Hills	Farm 2	20	0	0	Early	Beginning	2019-04-21	8.4	1	FIRST	1.55
Forest Hills	Farm 2	21	1	1	Early	Beginning	2019-04-21	3.95	1	FIRST	1.55
Forest Hills	Farm 2	22	1	1	Early	Beginning	2019-04-21	10.8	1	FIRST	2.35
Forest Hills	Farm 2	23	0	0	Early	Beginning	2019-04-21	9.85	1	FIRST	0.95
Forest Hills	Farm 2	24	0	0	Early	Beginning	2019-04-21	10.45	1	FIRST	2.45
Angel Valley	Farm 3	26	0	0	Early	Beginning	2019-04-26	12.55	1	FIRST	2.55
Angel Valley	Farm 3	27	0	2	Early	Beginning	2019-04-26	3.95	1	FIRST	4.4
Angel Valley	Farm 3	28	0	1	Early	Beginning	2019-04-26	17.65	1	FIRST	5.8
Angel Valley	Farm 3	29	0	1	Early	Beginning	2019-04-26	13.55	1	FIRST	3.35
Angel Valley	Farm 3	30	0	1	Early	Beginning	2019-04-26	0.7	1	FIRST	0.45
Angel Valley	Farm 3	31	0	0	Early	Beginning	2019-04-26	6.35	1	FIRST	4.75
Angel Valley	Farm 3	32	0	1	Early	Beginning	2019-04-26	10.7	1	FIRST	4.6
Angel Valley	Farm 3	33	0	0	Early	Beginning	2019-04-26	14.8	1	FIRST	3.95
Angel Valley	Farm 3	34	0	0	Early	Beginning	2019-04-26	6.15	1	FIRST	4.7
Angel Valley	Farm 3	35	0	0	Early	Beginning	2019-04-26	3.75	1	FIRST	5.05
Angel Valley	Farm 3	36	0	1	Early	Beginning	2019-04-26	5.45	1	FIRST	2.8
Five Oaks	Farm 4	39	0	1	Early	Beginning	2019-04-27	8.45	1	FIRST	8.15
Five Oaks	Farm 4	40	0	0	Early	Beginning	2019-04-27	9.45	1	FIRST	6.71
Five Oaks	Farm 4	41	0	0	Early	Beginning	2019-04-27	7.7	1	FIRST	7
Five Oaks	Farm 4	42	0	0	Early	Beginning	2019-04-27	9.25	1	FIRST	7.9
Five Oaks	Farm 4	43	0	0	Early	Beginning	2019-04-27	14.25	1	FIRST	5.6
Five Oaks	Farm 4	44	0	0	Early	Beginning	2019-04-27	14.8	0	FIRST	0
Five Oaks	Farm 4	45	0	0	Early	Beginning	2019-04-27	7.95	1	FIRST	3.55
Five Oaks	Farm 4	46	0	0	Early	Beginning	2019-04-27	10.45	1	FIRST	5.65
Verboort	Farm 1	1	0	0	Late	End	2019-05-19	11.3	1	LAST	0
Verboort	Farm 1	2	0	1	Late	End	2019-05-19	15.6	1	LAST	7.8
Verboort	Farm 1	3	0	1	Late	End	2019-05-19	15.15	1	LAST	8.65
Verboort	Farm 1	4	2	3	Late	End	2019-05-19	15.7	1	LAST	9.5
Verboort	Farm 1	5	0	0	Late	End	2019-05-19	9.8	1	LAST	0.3
Verboort	Farm 1	6	3	2	Late	End	2019-05-19	11.5	1	LAST	6.5
Verboort	Farm 1	7	0	2	Late	End	2019-05-19	14.05	1	LAST	7.6
Verboort	Farm 1	8	0	1	Late	End	2019-05-19	10.55	1	LAST	6.45
Verboort	Farm 1	9	3	2	Late	End	2019-05-19	9	1	LAST	6.25
Verboort	Farm 1	10	3	2	Late	End	2019-05-19	8.35	1	LAST	8
Verboort	Farm 1	11	3	1	Late	End	2019-05-19	10	1	LAST	5.4
Verboort	Farm 1	12	1	2	Late	End	2019-05-19	12.8	1	LAST	6.1
Forest Hills	Farm 2	13	3	3	Late	End	2019-05-19	5.9	1	LAST	5.55
Forest Hills	Farm 2	14	1	3	Late	End	2019-05-19	3.95	1	LAST	4.85
Forest Hills	Farm 2	15	0	1	Late	End	2019-05-19	14.2	1	LAST	8.4
Forest Hills	Farm 2	16	2	3	Late	End	2019-05-19	2.15	1	LAST	2.7
Forest Hills	Farm 2	17	3	2	Late	End	2019-05-19	8.6	1	LAST	5.1
Forest Hills	Farm 2	18	1	1	Late	End	2019-05-19	6.25	1	LAST	4.85
Forest Hills	Farm 2	19	3	1	Late	End	2019-05-19	6.55	1	LAST	6.3
Forest Hills	Farm 2	20	0	0	Late	End	2019-05-19	4.7	1	LAST	0
Forest Hills	Farm 2	21	3	2	Late	End	2019-05-19	9.15	1	LAST	7.75
Forest Hills	Farm 2	22	0	1	Late	End	2019-05-19	6	1	LAST	5
Forest Hills	Farm 2	23	0	2	Late	End	2019-05-19	9.1	1	LAST	5.9
Forest Hills	Farm 2	24	0	0	Late	End	2019-05-19	13.55	1	LAST	8.05
Angel Valley	Farm 3	26	0	1	Late	End	2019-05-22	9.9	1	LAST	0.95
Angel Valley	Farm 3	27	3	2	Late	End	2019-05-22	3.5	1	LAST	3.45
Angel Valley	Farm 3	28	3	1	Late	End	2019-05-22	16.4	1	LAST	7.35
Angel Valley	Farm 3	29	1	2	Late	End	2019-05-22	7.25	1	LAST	2.2
Angel Valley	Farm 3	30	0	0	Late	End	2019-05-22	0.2	0	LAST	0
Angel Valley	Farm 3	31	3	1	Late	End	2019-05-22	7.05	1	LAST	6.4
Angel Valley	Farm 3	32	0	0	Late	End	2019-05-22	8.2	1	LAST	2.15
Angel Valley	Farm 3	33	2	2	Late	End	2019-05-22	9.05	1	LAST	4.3
Angel Valley	Farm 3	34	3	1	Late	End	2019-05-22	4.2	1	LAST	4.8
Angel Valley	Farm 3	35	3	2	Late	End	2019-05-22	8.7	1	LAST	6.9
Angel Valley	Farm 3	36	3	2	Late	End	2019-05-22	9.85	1	LAST	6.75
Five Oaks	Farm 4	39	1	2	Late	End	2019-05-11	12.7	1	LAST	9.05
Five Oaks	Farm 4	40	0	1	Late	End	2019-05-11	10.4	1	LAST	8.6
Five Oaks	Farm 4	41	0	1	Late	End	2019-05-11	9.6	1	LAST	8.4
Five Oaks	Farm 4	42	0	0	Late	End	2019-05-11	10.75	1	LAST	7.7
Five Oaks	Farm 4	43	1	1	Late	End	2019-05-11	10.4	1	LAST	5.55
Five Oaks	Farm 4	44	0	0	Late	End	2019-05-11	9.8	1	LAST	0
Five Oaks	Farm 4	45	0	2	Late	End	2019-05-11	7.45	1	LAST	3.1
Five Oaks	Farm 4	46	0	1	Late	End	2019-05-11	13.35	1	LAST	7.7

## Sheet: flight
Farm	Colony	Date	Season	Time	Entrances	Flight Temp	Flight
Verboort	1	2019-05-05	Middle	12:42:00	3	70	112
Verboort	2	2019-05-05	Middle	12:42:00	3	70	127
Verboort	3	2019-05-05	Middle	12:38:00	3	70	89
Verboort	4	2019-05-05	Middle	12:38:00	3	70	73
Verboort	5	2019-05-05	Middle	12:40:00	2	70	75
Verboort	6	2019-05-05	Middle	12:36:00	3	70	105
Verboort	7	2019-05-05	Middle	12:36:00	5	70	125
Verboort	8	2019-05-05	Middle	12:30:00	3	70	84
Verboort	9	2019-05-05	Middle	12:28:00	3	70	144
Verboort	10	2019-05-05	Middle	12:28:00	2	70	72
Verboort	11	2019-05-05	Middle	12:27:00	3	70	100
Verboort	12	2019-05-05	Middle	12:27:00	3	70	87
Forest Hills	13	2019-05-05	Middle	13:59:00	2	72	87
Forest Hills	14	2019-05-05	Middle	13:59:00	2	72	48
Forest Hills	15	2019-05-05	Middle	13:57:00	2	72	97
Forest Hills	16	2019-05-05	Middle	13:57:00	2	72	27
Forest Hills	17	2019-05-05	Middle	13:55:00	3	72	56
Forest Hills	18	2019-05-05	Middle	13:55:00	3	72	67
Forest Hills	19	2019-05-05	Middle	13:48:00	2	72	36
Forest Hills	20	2019-05-05	Middle	13:48:00	2	72	65
Forest Hills	21	2019-05-05	Middle	13:50:00	2	72	54
Forest Hills	22	2019-05-05	Middle	13:50:00	2	72	84
Forest Hills	23	2019-05-05	Middle	13:52:00	3	72	62
Forest Hills	24	2019-05-05	Middle	13:52:00	2	72	103
Angel Valley	25	2019-04-21	Beginning	16:04:00	2	62	55
Angel Valley	26	2019-04-21	Beginning	16:04:00	1	62	42
Angel Valley	27	2019-04-21	Beginning	16:05:00	2	62	53
Angel Valley	28	2019-04-21	Beginning	16:05:00	2	62	110
Angel Valley	29	2019-04-21	Beginning	16:06:00	1	62	26
Angel Valley	30	2019-04-21	Beginning	16:06:00	1	62	11
Angel Valley	31	2019-04-21	Beginning	16:10:00	1	62	27
Angel Valley	32	2019-04-21	Beginning	16:10:00	1	62	72
Angel Valley	33	2019-04-21	Beginning	16:10:00	1	62	54
Angel Valley	34	2019-04-21	Beginning	16:10:00	1	62	33
Angel Valley	35	2019-04-21	Beginning	16:11:00	1	62	27
Angel Valley	36	2019-04-21	Beginning	16:11:00	1	62	25
Angel Valley	37	2019-04-21	Beginning	16:07:00	1	62	43
Angel Valley	38	2019-04-21	Beginning	16:07:00	1	62	28
Five Oaks	39	2019-04-28	Beginning	16:00:00	2	59	76
Five Oaks	40	2019-04-28	Beginning	16:00:00	2	59	48
Five Oaks	41	2019-04-28	Beginning	16:30:00	2	59	85
Five Oaks	42	2019-04-28	Beginning	16:30:00	2	59	98
Five Oaks	43	2019-04-28	Beginning	16:00:00	2	58	57
Five Oaks	44	2019-04-28	Beginning	16:00:00	1	58	55
Five Oaks	45	2019-04-28	Beginning	15:30:00	2	58	79
Five Oaks	46	2019-04-28	Beginning	15:30:00	2	58	37
Five Oaks	47	2019-04-28	Beginning	15:45:00	4	58	135
Five Oaks	48	2019-04-28	Beginning	15:45:00	3	58	132
Five Oaks	49	2019-04-28	Beginning	16:00:00	2	58	48
Five Oaks	50	2019-04-28	Beginning	16:00:00	3	58	136
Five Oaks	43	2019-05-11	Middle	12:30:00	2	75	67
Five Oaks	44	2019-05-11	Middle	12:30:00	1	75	38
Five Oaks	47	2019-05-11	Middle	12:30:00	4	75	113
Five Oaks	48	2019-05-11	Middle	12:30:00	2	75	114
Five Oaks	49	2019-05-11	Middle	12:30:00	2	75	22
Five Oaks	50	2019-05-11	Middle	12:30:00	3	75	71

## Sheet: visitation
Farm	Site Number	Date	StartTime	EndTime	Variety	Field ID	Crop Stage	EventId	Bumble Bee Visits	Honey Bee Visits	Geopoint	User	Event Notes
Forest Hills	1	2019-05-16	15:37:00	16:25:00	Duke	405	Petal Fall	576	0	0	POINT (-123.0212071 45.4800692)	juliep	61f, 4mph wind, beekeeper smoked/checked hives at 11am today so bees are a bit angry. cloudy, no rain.
Forest Hills	2	2019-05-16	15:37:00	16:25:00	Duke	405	Petal Fall	576	0	0	POINT (-123.0212547 45.4801385)	juliep	61f, 4mph wind, beekeeper smoked/checked hives at 11am today so bees are a bit angry. cloudy, no rain.
Forest Hills	3	2019-05-16	15:37:00	16:25:00	Duke	405	Petal Fall	576	0	0	POINT (-123.0212364 45.480229)	juliep	61f, 4mph wind, beekeeper smoked/checked hives at 11am today so bees are a bit angry. cloudy, no rain.
Forest Hills	4	2019-05-16	15:37:00	16:25:00	Duke	405	Petal Fall	576	0	0	POINT (-123.0212476 45.4803205)	juliep	61f, 4mph wind, beekeeper smoked/checked hives at 11am today so bees are a bit angry. cloudy, no rain.
Forest Hills	5	2019-05-16	15:37:00	16:25:00	Duke	405	Petal Fall	576	0	0	POINT (-123.0212436 45.4804419)	juliep	61f, 4mph wind, beekeeper smoked/checked hives at 11am today so bees are a bit angry. cloudy, no rain.
Forest Hills	6	2019-05-16	15:37:00	16:25:00	Duke	405	Petal Fall	576	0	0	POINT (-123.0211728 45.4804822)	juliep	61f, 4mph wind, beekeeper smoked/checked hives at 11am today so bees are a bit angry. cloudy, no rain.
Forest Hills	7	2019-05-16	15:37:00	16:25:00	Duke	405	Petal Fall	576	0	0	POINT (-123.0211976 45.480397)	juliep	61f, 4mph wind, beekeeper smoked/checked hives at 11am today so bees are a bit angry. cloudy, no rain.
Forest Hills	8	2019-05-16	15:37:00	16:25:00	Duke	405	Petal Fall	576	0	1	POINT (-123.021194 45.4803015)	juliep	61f, 4mph wind, beekeeper smoked/checked hives at 11am today so bees are a bit angry. cloudy, no rain.
Forest Hills	9	2019-05-16	15:37:00	16:25:00	Duke	405	Petal Fall	576	0	0	POINT (-123.0212071 45.4802032)	juliep	61f, 4mph wind, beekeeper smoked/checked hives at 11am today so bees are a bit angry. cloudy, no rain.
Forest Hills	10	2019-05-16	15:37:00	16:25:00	Duke	405	Petal Fall	576	0	0	POINT (-123.0211929 45.480111)	juliep	61f, 4mph wind, beekeeper smoked/checked hives at 11am today so bees are a bit angry. cloudy, no rain.
Forest Hills	11	2019-05-16	15:37:00	16:25:00	Duke	405	Petal Fall	576	0	1	POINT (-123.0213229 45.4800433)	juliep	61f, 4mph wind, beekeeper smoked/checked hives at 11am today so bees are a bit angry. cloudy, no rain.
Forest Hills	12	2019-05-16	15:37:00	16:25:00	Duke	405	Petal Fall	576	0	0	POINT (-123.0213204 45.4800749)	juliep	61f, 4mph wind, beekeeper smoked/checked hives at 11am today so bees are a bit angry. cloudy, no rain.
Forest Hills	13	2019-05-16	15:37:00	16:25:00	Duke	405	Petal Fall	576	0	0	POINT (-123.0213383 45.4801302)	juliep	61f, 4mph wind, beekeeper smoked/checked hives at 11am today so bees are a bit angry. cloudy, no rain.
Forest Hills	14	2019-05-16	15:37:00	16:25:00	Duke	405	Petal Fall	576	0	0	POINT (-123.0213267 45.4801763)	juliep	61f, 4mph wind, beekeeper smoked/checked hives at 11am today so bees are a bit angry. cloudy, no rain.
Forest Hills	15	2019-05-16	15:37:00	16:25:00	Duke	405	Petal Fall	576	0	0	POINT (-123.021317 45.4802229)	juliep	61f, 4mph wind, beekeeper smoked/checked hives at 11am today so bees are a bit angry. cloudy, no rain.
Forest Hills	16	2019-05-16	15:37:00	16:25:00	Duke	405	Petal Fall	576	0	0	POINT (-123.0213221 45.4802483)	juliep	61f, 4mph wind, beekeeper smoked/checked hives at 11am today so bees are a bit angry. cloudy, no rain.
Forest Hills	17	2019-05-16	15:37:00	16:25:00	Duke	405	Petal Fall	576	0	2	POINT (-123.0213144 45.4803151)	juliep	61f, 4mph wind, beekeeper smoked/checked hives at 11am today so bees are a bit angry. cloudy, no rain.
Forest Hills	18	2019-05-16	15:37:00	16:25:00	Duke	405	Petal Fall	576	0	0	POINT (-123.0213075 45.4803443)	juliep	61f, 4mph wind, beekeeper smoked/checked hives at 11am today so bees are a bit angry. cloudy, no rain.
Forest Hills	19	2019-05-16	15:37:00	16:25:00	Duke	405	Petal Fall	576	0	0	POINT (-123.0213196 45.480375)	juliep	61f, 4mph wind, beekeeper smoked/checked hives at 11am today so bees are a bit angry. cloudy, no rain.
Forest Hills	20	2019-05-16	15:37:00	16:25:00	Duke	405	Petal Fall	576	0	1	POINT (-123.0213069 45.4804317)	juliep	61f, 4mph wind, beekeeper smoked/checked hives at 11am today so bees are a bit angry. cloudy, no rain.
Forest Hills	21	2019-05-16	15:37:00	16:25:00	Duke	405	Petal Fall	576	0	0	POINT (-123.0214414 45.4803926)	juliep	61f, 4mph wind, beekeeper smoked/checked hives at 11am today so bees are a bit angry. cloudy, no rain.
Forest Hills	22	2019-05-16	15:37:00	16:25:00	Duke	405	Petal Fall	576	0	0	POINT (-123.0214305 45.4803588)	juliep	61f, 4mph wind, beekeeper smoked/checked hives at 11am today so bees are a bit angry. cloudy, no rain.
Forest Hills	23	2019-05-16	15:37:00	16:25:00	Duke	405	Petal Fall	576	0	0	POINT (-123.0214261 45.4803213)	juliep	61f, 4mph wind, beekeeper smoked/checked hives at 11am today so bees are a bit angry. cloudy, no rain.
Forest Hills	24	2019-05-16	15:37:00	16:25:00	Duke	405	Petal Fall	576	0	0	POINT (-123.0214237 45.4802824)	juliep	61f, 4mph wind, beekeeper smoked/checked hives at 11am today so bees are a bit angry. cloudy, no rain.
Forest Hills	25	2019-05-16	15:37:00	16:25:00	Duke	405	Petal Fall	576	0	0	POINT (-123.0213886 45.480238)	juliep	61f, 4mph wind, beekeeper smoked/checked hives at 11am today so bees are a bit angry. cloudy, no rain.
Forest Hills	26	2019-05-16	15:37:00	16:25:00	Duke	405	Petal Fall	576	0	0	POINT (-123.0214144 45.480191)	juliep	61f, 4mph wind, beekeeper smoked/checked hives at 11am today so bees are a bit angry. cloudy, no rain.
Forest Hills	27	2019-05-16	15:37:00	16:25:00	Duke	405	Petal Fall	576	0	0	POINT (-123.021426 45.4801658)	juliep	61f, 4mph wind, beekeeper smoked/checked hives at 11am today so bees are a bit angry. cloudy, no rain.
Forest Hills	28	2019-05-16	15:37:00	16:25:00	Duke	405	Petal Fall	576	0	0	POINT (-123.0214149 45.4801178)	juliep	61f, 4mph wind, beekeeper smoked/checked hives at 11am today so bees are a bit angry. cloudy, no rain.
Forest Hills	29	2019-05-16	15:37:00	16:25:00	Duke	405	Petal Fall	576	0	1	POINT (-123.0214434 45.4800566)	juliep	61f, 4mph wind, beekeeper smoked/checked hives at 11am today so bees are a bit angry. cloudy, no rain.
Forest Hills	30	2019-05-16	15:37:00	16:25:00	Duke	405	Petal Fall	576	0	0	POINT (-123.0214293 45.4800394)	juliep	61f, 4mph wind, beekeeper smoked/checked hives at 11am today so bees are a bit angry. cloudy, no rain.
Five Oaks	1	2019-05-15	15:04:00	15:38:00	Duke	984	Early Green Fruit	549	0	0	POINT (-122.89899588172975 45.010247369865439)	Joshr	pollinator study 55 degrees, drizzling, cloud cover, no wind. mostly green bud on plants, few pollinatable flowers left.
Five Oaks	2	2019-05-15	15:04:00	15:38:00	Duke	984	Early Green Fruit	549	0	0	POINT (-122.89883130359121 45.010237396707218)	Joshr	pollinator study 55 degrees, drizzling, cloud cover, no wind. mostly green bud on plants, few pollinatable flowers left.
Five Oaks	3	2019-05-15	15:04:00	15:38:00	Duke	984	Early Green Fruit	549	0	0	POINT (-122.89869023661532 45.010230747934116)	Joshr	pollinator study 55 degrees, drizzling, cloud cover, no wind. mostly green bud on plants, few pollinatable flowers left.
Five Oaks	4	2019-05-15	15:04:00	15:38:00	Duke	984	Early Green Fruit	549	0	0	POINT (-122.89854916963942 45.010230747934116)	Joshr	pollinator study 55 degrees, drizzling, cloud cover, no wind. mostly green bud on plants, few pollinatable flowers left.
Five Oaks	5	2019-05-15	15:04:00	15:38:00	Duke	984	Early Green Fruit	549	0	0	POINT (-122.89838929373343 45.010230747934116)	Joshr	pollinator study 55 degrees, drizzling, cloud cover, no wind. mostly green bud on plants, few pollinatable flowers left.
Five Oaks	6	2019-05-15	15:04:00	15:38:00	Duke	984	Early Green Fruit	549	0	0	POINT (-122.89920277996104 45.010214125997983)	Joshr	pollinator study 55 degrees, drizzling, cloud cover, no wind. mostly green bud on plants, few pollinatable flowers left.
Five Oaks	7	2019-05-15	15:04:00	15:38:00	Duke	984	Early Green Fruit	549	0	0	POINT (-122.89823412005997 45.010217450385596)	Joshr	pollinator study 55 degrees, drizzling, cloud cover, no wind. mostly green bud on plants, few pollinatable flowers left.
Five Oaks	8	2019-05-15	15:04:00	15:38:00	Duke	984	Early Green Fruit	549	0	1	POINT (-122.8980977553166 45.010234072320785)	Joshr	pollinator study 55 degrees, drizzling, cloud cover, no wind. mostly green bud on plants, few pollinatable flowers left.
Five Oaks	9	2019-05-15	15:04:00	15:38:00	Duke	984	Early Green Fruit	549	0	3	POINT (-122.89789085708532 45.010270640561167)	Joshr	pollinator study 55 degrees, drizzling, cloud cover, no wind. mostly green bud on plants, few pollinatable flowers left.
Five Oaks	10	2019-05-15	15:04:00	15:38:00	Duke	984	Early Green Fruit	549	0	0	POINT (-122.89763693652871 45.010280613713611)	Joshr	pollinator study 55 degrees, drizzling, cloud cover, no wind. mostly green bud on plants, few pollinatable flowers left.
Five Oaks	11	2019-05-15	15:04:00	15:38:00	Duke	984	Early Green Fruit	549	0	0	POINT (-122.8987760387278 45.009827143811911)	Joshr	pollinator study 55 degrees, drizzling, cloud cover, no wind. mostly green bud on plants, few pollinatable flowers left.
Five Oaks	12	2019-05-15	15:04:00	15:38:00	Duke	984	Early Green Fruit	549	0	0	POINT (-122.89859873590666 45.009832841562627)	Joshr	pollinator study 55 degrees, drizzling, cloud cover, no wind. mostly green bud on plants, few pollinatable flowers left.
Five Oaks	13	2019-05-15	15:04:00	15:38:00	Duke	984	Early Green Fruit	549	0	5	POINT (-122.89841730347595 45.009815648309235)	Joshr	pollinator study 55 degrees, drizzling, cloud cover, no wind. mostly green bud on plants, few pollinatable flowers left.
Five Oaks	14	2019-05-15	15:04:00	15:38:00	Duke	984	Early Green Fruit	549	0	0	POINT (-122.89827616714096 45.009812699433532)	Joshr	pollinator study 55 degrees, drizzling, cloud cover, no wind. mostly green bud on plants, few pollinatable flowers left.
Five Oaks	15	2019-05-15	15:04:00	15:38:00	Duke	984	Early Green Fruit	549	0	0	POINT (-122.89816333807298 45.009818397185676)	Joshr	pollinator study 55 degrees, drizzling, cloud cover, no wind. mostly green bud on plants, few pollinatable flowers left.
Five Oaks	16	2019-05-15	15:04:00	15:38:00	Duke	984	Early Green Fruit	549	0	0	POINT (-122.89803026095709 45.009815448310128)	Joshr	pollinator study 55 degrees, drizzling, cloud cover, no wind. mostly green bud on plants, few pollinatable flowers left.
Five Oaks	17	2019-05-15	15:04:00	15:38:00	Duke	984	Early Green Fruit	549	0	0	POINT (-122.89793355032738 45.009826843813315)	Joshr	pollinator study 55 degrees, drizzling, cloud cover, no wind. mostly green bud on plants, few pollinatable flowers left.
Five Oaks	18	2019-05-15	15:04:00	15:38:00	Duke	984	Early Green Fruit	549	0	0	POINT (-122.89782878047855 45.009826843813315)	Joshr	pollinator study 55 degrees, drizzling, cloud cover, no wind. mostly green bud on plants, few pollinatable flowers left.
Five Oaks	19	2019-05-15	15:04:00	15:38:00	Duke	984	Early Green Fruit	549	0	0	POINT (-122.89769177375312 45.009835390439228)	Joshr	pollinator study 55 degrees, drizzling, cloud cover, no wind. mostly green bud on plants, few pollinatable flowers left.
Five Oaks	20	2019-05-15	15:04:00	15:38:00	Duke	984	Early Green Fruit	549	0	0	POINT (-122.89759496312345 45.009860930309834)	Joshr	pollinator study 55 degrees, drizzling, cloud cover, no wind. mostly green bud on plants, few pollinatable flowers left.
Five Oaks	21	2019-05-15	15:04:00	15:38:00	Duke	984	Early Green Fruit	549	0	0	POINT (-122.89776574750626 45.009581993328752)	Joshr	pollinator study 55 degrees, drizzling, cloud cover, no wind. mostly green bud on plants, few pollinatable flowers left.
Five Oaks	22	2019-05-15	15:04:00	15:38:00	Duke	984	Early Green Fruit	549	0	0	POINT (-122.89785552852641 45.009582242217256)	Joshr	pollinator study 55 degrees, drizzling, cloud cover, no wind. mostly green bud on plants, few pollinatable flowers left.
Five Oaks	23	2019-05-15	15:04:00	15:38:00	Duke	984	Early Green Fruit	549	0	0	POINT (-122.89802157212841 45.009584939993658)	Joshr	pollinator study 55 degrees, drizzling, cloud cover, no wind. mostly green bud on plants, few pollinatable flowers left.
Five Oaks	24	2019-05-15	15:04:00	15:38:00	Duke	984	Early Green Fruit	549	0	0	POINT (-122.8986357023928 45.009585588882253)	Joshr	pollinator study 55 degrees, drizzling, cloud cover, no wind. mostly green bud on plants, few pollinatable flowers left.
Five Oaks	25	2019-05-15	15:04:00	15:38:00	Duke	984	Early Green Fruit	549	0	0	POINT (-122.89795436876572 45.009606082202062)	Joshr	pollinator study 55 degrees, drizzling, cloud cover, no wind. mostly green bud on plants, few pollinatable flowers left.
Five Oaks	26	2019-05-15	15:04:00	15:38:00	Duke	984	Early Green Fruit	549	0	0	POINT (-122.89825025987393 45.009566946665956)	Joshr	pollinator study 55 degrees, drizzling, cloud cover, no wind. mostly green bud on plants, few pollinatable flowers left.
Five Oaks	27	2019-05-15	15:04:00	15:38:00	Duke	984	Early Green Fruit	549	0	0	POINT (-122.89837457777067 45.009563497777521)	Joshr	pollinator study 55 degrees, drizzling, cloud cover, no wind. mostly green bud on plants, few pollinatable flowers left.
Five Oaks	28	2019-05-15	15:04:00	15:38:00	Duke	984	Early Green Fruit	549	0	0	POINT (-122.89813743080595 45.009564097777456)	Joshr	pollinator study 55 degrees, drizzling, cloud cover, no wind. mostly green bud on plants, few pollinatable flowers left.
Five Oaks	29	2019-05-15	15:04:00	15:38:00	Duke	984	Early Green Fruit	549	0	0	POINT (-122.89851511410563 45.009574493330945)	Joshr	pollinator study 55 degrees, drizzling, cloud cover, no wind. mostly green bud on plants, few pollinatable flowers left.
Five Oaks	30	2019-05-15	15:04:00	15:38:00	Duke	984	Early Green Fruit	549	0	1	POINT (-122.89876434989905 45.009599633318196)	Joshr	pollinator study 55 degrees, drizzling, cloud cover, no wind. mostly green bud on plants, few pollinatable flowers left.
Eden	1	2019-05-14	12:44:00	12:51:00	Duke	267	Early Green Fruit	539	0	2	POINT (-122.85592387039043 45.051841870765386)	Joshr	57 degrees, pollinator survey, sprinkling rain, about 10%-25% of pollinatable buds left, lots of petal fall
Eden	2	2019-05-14	12:44:00	12:51:00	Duke	267	Early Green Fruit	539	0	1	POINT (-122.85594614804785 45.051761460729487)	Joshr	57 degrees, pollinator survey, sprinkling rain, about 10%-25% of pollinatable buds left, lots of petal fall
Eden	3	2019-05-14	12:44:00	12:51:00	Duke	267	Early Green Fruit	539	0	3	POINT (-122.85591311117129 45.051704224921082)	Joshr	57 degrees, pollinator survey, sprinkling rain, about 10%-25% of pollinatable buds left, lots of petal fall
Eden	4	2019-05-14	12:44:00	12:51:00	Duke	267	Early Green Fruit	539	0	0	POINT (-122.85593255921916 45.051632955081274)	Joshr	57 degrees, pollinator survey, sprinkling rain, about 10%-25% of pollinatable buds left, lots of petal fall
Eden	5	2019-05-14	12:44:00	12:51:00	Duke	267	Early Green Fruit	539	0	1	POINT (-122.85591088156171 45.051804462548375)	Joshr	57 degrees, pollinator survey, sprinkling rain, about 10%-25% of pollinatable buds left, lots of petal fall
Eden	6	2019-05-14	12:44:00	12:51:00	Duke	267	Early Green Fruit	539	0	0	POINT (-122.85591997039045 45.051592999931948)	Joshr	57 degrees, pollinator survey, sprinkling rain, about 10%-25% of pollinatable buds left, lots of petal fall
Eden	7	2019-05-14	12:44:00	12:51:00	Duke	267	Early Green Fruit	539	0	3	POINT (-122.8559236 45.051538810756313)	Joshr	57 degrees, pollinator survey, sprinkling rain, about 10%-25% of pollinatable buds left, lots of petal fall
Eden	8	2019-05-14	12:44:00	12:51:00	Duke	267	Early Green Fruit	539	0	4	POINT (-122.85593931843829 45.051473234317257)	Joshr	57 degrees, pollinator survey, sprinkling rain, about 10%-25% of pollinatable buds left, lots of petal fall
Eden	9	2019-05-14	12:44:00	12:51:00	Duke	267	Early Green Fruit	539	0	1	POINT (-122.85593125921912 45.051427685446342)	Joshr	57 degrees, pollinator survey, sprinkling rain, about 10%-25% of pollinatable buds left, lots of petal fall
Eden	10	2019-05-14	12:44:00	12:51:00	Duke	267	Early Green Fruit	539	0	2	POINT (-122.85594697765742 45.051362108879893)	Joshr	57 degrees, pollinator survey, sprinkling rain, about 10%-25% of pollinatable buds left, lots of petal fall
Eden	11	2019-05-14	12:44:00	12:51:00	Duke	267	Early Green Fruit	539	0	1	POINT (-122.85714448882869 45.050410932910111)	Joshr	57 degrees, pollinator survey, sprinkling rain, about 10%-25% of pollinatable buds left, lots of petal fall
Eden	12	2019-05-14	12:44:00	12:51:00	Duke	267	Early Green Fruit	539	0	1	POINT (-122.85715254804785 45.050558969239653)	Joshr	57 degrees, pollinator survey, sprinkling rain, about 10%-25% of pollinatable buds left, lots of petal fall
Eden	13	2019-05-14	12:44:00	12:51:00	Duke	267	Early Green Fruit	539	0	2	POINT (-122.85715657765741 45.050721239391443)	Joshr	57 degrees, pollinator survey, sprinkling rain, about 10%-25% of pollinatable buds left, lots of petal fall
Eden	14	2019-05-14	12:44:00	12:51:00	Duke	267	Early Green Fruit	539	0	3	POINT (-122.85717269609572 45.050872121751105)	Joshr	57 degrees, pollinator survey, sprinkling rain, about 10%-25% of pollinatable buds left, lots of petal fall
Eden	15	2019-05-14	12:44:00	12:51:00	Duke	267	Early Green Fruit	539	0	0	POINT (-122.85717672570529 45.051042931489249)	Joshr	57 degrees, pollinator survey, sprinkling rain, about 10%-25% of pollinatable buds left, lots of petal fall
Eden	16	2019-05-14	12:44:00	12:51:00	Duke	267	Early Green Fruit	539	0	1	POINT (-122.85715254804785 45.051182425730289)	Joshr	57 degrees, pollinator survey, sprinkling rain, about 10%-25% of pollinatable buds left, lots of petal fall
Eden	17	2019-05-14	12:44:00	12:51:00	Duke	267	Early Green Fruit	539	0	2	POINT (-122.85716463687655 45.0513276132525)	Joshr	57 degrees, pollinator survey, sprinkling rain, about 10%-25% of pollinatable buds left, lots of petal fall
Eden	18	2019-05-14	12:44:00	12:51:00	Duke	267	Early Green Fruit	539	0	5	POINT (-122.85716060726699 45.051469953602762)	Joshr	57 degrees, pollinator survey, sprinkling rain, about 10%-25% of pollinatable buds left, lots of petal fall
Eden	19	2019-05-14	12:44:00	12:51:00	Duke	267	Early Green Fruit	539	0	2	POINT (-122.85714851843827 45.051623680783152)	Joshr	57 degrees, pollinator survey, sprinkling rain, about 10%-25% of pollinatable buds left, lots of petal fall
Eden	20	2019-05-14	12:44:00	12:51:00	Duke	267	Early Green Fruit	539	0	3	POINT (-122.85712031117126 45.051794488276734)	Joshr	57 degrees, pollinator survey, sprinkling rain, about 10%-25% of pollinatable buds left, lots of petal fall
Eden	21	2019-05-14	12:44:00	12:51:00	Duke	267	Early Green Fruit	539	0	0	POINT (-122.85816435921916 45.051798609320393)	Joshr	57 degrees, pollinator survey, sprinkling rain, about 10%-25% of pollinatable buds left, lots of petal fall
Eden	22	2019-05-14	12:44:00	12:51:00	Duke	267	Early Green Fruit	539	0	0	POINT (-122.85814824078086 45.05166481017001)	Joshr	57 degrees, pollinator survey, sprinkling rain, about 10%-25% of pollinatable buds left, lots of petal fall
Eden	23	2019-05-14	12:44:00	12:51:00	Duke	267	Early Green Fruit	539	0	1	POINT (-122.85816435921916 45.051522470304711)	Joshr	57 degrees, pollinator survey, sprinkling rain, about 10%-25% of pollinatable buds left, lots of petal fall
Eden	24	2019-05-14	12:44:00	12:51:00	Duke	267	Early Green Fruit	539	0	2	POINT (-122.85815227039042 45.051385823700741)	Joshr	57 degrees, pollinator survey, sprinkling rain, about 10%-25% of pollinatable buds left, lots of petal fall
Eden	25	2019-05-14	12:44:00	12:51:00	Duke	267	Early Green Fruit	539	0	0	POINT (-122.85814824078086 45.051226402250151)	Joshr	57 degrees, pollinator survey, sprinkling rain, about 10%-25% of pollinatable buds left, lots of petal fall
Eden	26	2019-05-14	12:44:00	12:51:00	Duke	267	Early Green Fruit	539	0	2	POINT (-122.85816838882873 45.051066980355159)	Joshr	57 degrees, pollinator survey, sprinkling rain, about 10%-25% of pollinatable buds left, lots of petal fall
Eden	27	2019-05-14	12:44:00	12:51:00	Duke	267	Early Green Fruit	539	0	0	POINT (-122.85814421117129 45.050807918828085)	Joshr	57 degrees, pollinator survey, sprinkling rain, about 10%-25% of pollinatable buds left, lots of petal fall
Eden	28	2019-05-14	12:44:00	12:51:00	Duke	267	Early Green Fruit	539	0	0	POINT (-122.85814018156174 45.050611486778088)	Joshr	57 degrees, pollinator survey, sprinkling rain, about 10%-25% of pollinatable buds left, lots of petal fall
Eden	29	2019-05-14	12:44:00	12:51:00	Duke	267	Early Green Fruit	539	0	2	POINT (-122.858128092733 45.050249936168832)	Joshr	57 degrees, pollinator survey, sprinkling rain, about 10%-25% of pollinatable buds left, lots of petal fall
Eden	30	2019-05-14	12:44:00	12:51:00	Duke	267	Early Green Fruit	539	0	1	POINT (-122.85813212234257 45.050440675751439)	Joshr	57 degrees, pollinator survey, sprinkling rain, about 10%-25% of pollinatable buds left, lots of petal fall
Angel Valley	1	2019-05-14	15:27:00	15:32:00	Duke	547	Petal Fall	540	0	3	POINT (-122.70898065354612 44.707038016469)	Joshr	61 degrees, pollinator study, >50% of buds still on plants and pollinatable. early green berry showing
Angel Valley	2	2019-05-14	15:27:00	15:32:00	Duke	547	Petal Fall	540	0	0	POINT (-122.7087479868807 44.70677422851027)	Joshr	61 degrees, pollinator study, >50% of buds still on plants and pollinatable. early green berry showing
Angel Valley	3	2019-05-14	15:27:00	15:32:00	Duke	547	Petal Fall	540	0	0	POINT (-122.70862611386546 44.706467130566367)	Joshr	61 degrees, pollinator study, >50% of buds still on plants and pollinatable. early green berry showing
Angel Valley	4	2019-05-14	15:27:00	15:32:00	Duke	547	Petal Fall	540	0	0	POINT (-122.70847654243768 44.706120659135273)	Joshr	61 degrees, pollinator study, >50% of buds still on plants and pollinatable. early green berry showing
Angel Valley	5	2019-05-14	15:27:00	15:32:00	Duke	547	Petal Fall	540	0	1	POINT (-122.70831589164487 44.705750562361388)	Joshr	61 degrees, pollinator study, >50% of buds still on plants and pollinatable. early green berry showing
Angel Valley	6	2019-05-14	15:27:00	15:32:00	Duke	547	Petal Fall	540	0	2	POINT (-122.70818293926466 44.705419835582674)	Joshr	61 degrees, pollinator study, >50% of buds still on plants and pollinatable. early green berry showing
Angel Valley	7	2019-05-14	15:27:00	15:32:00	Duke	547	Petal Fall	540	0	0	POINT (-122.70805552656688 44.70505760884754)	Joshr	61 degrees, pollinator study, >50% of buds still on plants and pollinatable. early green berry showing
Angel Valley	8	2019-05-14	15:27:00	15:32:00	Duke	547	Petal Fall	540	0	4	POINT (-122.70794473291667 44.704671756136563)	Joshr	61 degrees, pollinator study, >50% of buds still on plants and pollinatable. early green berry showing
Angel Valley	9	2019-05-14	15:27:00	15:32:00	Duke	547	Petal Fall	540	0	5	POINT (-122.70781732021895 44.704404020090983)	Joshr	61 degrees, pollinator study, >50% of buds still on plants and pollinatable. early green berry showing
Angel Valley	10	2019-05-14	15:27:00	15:32:00	Duke	547	Petal Fall	540	0	3	POINT (-122.70765112974364 44.704152032093425)	Joshr	61 degrees, pollinator study, >50% of buds still on plants and pollinatable. early green berry showing
Angel Valley	11	2019-05-14	15:27:00	15:32:00	Duke	547	Petal Fall	540	0	4	POINT (-122.70905820910129 44.704774125473811)	Joshr	61 degrees, pollinator study, >50% of buds still on plants and pollinatable. early green berry showing
Angel Valley	12	2019-05-14	15:27:00	15:32:00	Duke	547	Petal Fall	540	0	5	POINT (-122.70916900275149 44.705041859807672)	Joshr	61 degrees, pollinator study, >50% of buds still on plants and pollinatable. early green berry showing
Angel Valley	13	2019-05-14	15:27:00	15:32:00	Duke	547	Petal Fall	540	0	3	POINT (-122.70930195513175 44.70535290255237)	Joshr	61 degrees, pollinator study, >50% of buds still on plants and pollinatable. early green berry showing
Angel Valley	14	2019-05-14	15:27:00	15:32:00	Duke	547	Petal Fall	540	0	2	POINT (-122.70932411386178 44.705600948100319)	Joshr	61 degrees, pollinator study, >50% of buds still on plants and pollinatable. early green berry showing
Angel Valley	15	2019-05-14	15:27:00	15:32:00	Duke	547	Petal Fall	540	0	0	POINT (-122.70941828846446 44.705817494931935)	Joshr	61 degrees, pollinator study, >50% of buds still on plants and pollinatable. early green berry showing
Angel Valley	16	2019-05-14	15:27:00	15:32:00	Duke	547	Petal Fall	540	0	0	POINT (-122.70950692338461 44.706045852531346)	Joshr	61 degrees, pollinator study, >50% of buds still on plants and pollinatable. early green berry showing
Angel Valley	17	2019-05-14	15:27:00	15:32:00	Duke	547	Petal Fall	540	0	0	POINT (-122.70967865354247 44.70639626157876)	Joshr	61 degrees, pollinator study, >50% of buds still on plants and pollinatable. early green berry showing
Angel Valley	18	2019-05-14	15:27:00	15:32:00	Duke	547	Petal Fall	540	0	5	POINT (-122.70973959005008 44.706612805435228)	Joshr	61 degrees, pollinator study, >50% of buds still on plants and pollinatable. early green berry showing
Angel Valley	19	2019-05-14	15:27:00	15:32:00	Duke	547	Petal Fall	540	0	6	POINT (-122.70977282814513 44.706801788502524)	Joshr	61 degrees, pollinator study, >50% of buds still on plants and pollinatable. early green berry showing
Angel Valley	20	2019-05-14	15:27:00	15:32:00	Duke	547	Petal Fall	540	0	3	POINT (-122.70961217735231 44.706301769460218)	Joshr	61 degrees, pollinator study, >50% of buds still on plants and pollinatable. early green berry showing
Angel Valley	21	2019-05-14	15:27:00	15:32:00	Duke	547	Petal Fall	540	0	4	POINT (-122.7104375900464 44.706762417081059)	Joshr	61 degrees, pollinator study, >50% of buds still on plants and pollinatable. early green berry showing
Angel Valley	22	2019-05-14	15:27:00	15:32:00	Duke	547	Petal Fall	540	0	3	POINT (-122.71036003449123 44.70666398841022)	Joshr	61 degrees, pollinator study, >50% of buds still on plants and pollinatable. early green berry showing
Angel Valley	23	2019-05-14	15:27:00	15:32:00	Duke	547	Petal Fall	540	0	4	POINT (-122.71033233607869 44.7065576852577)	Joshr	61 degrees, pollinator study, >50% of buds still on plants and pollinatable. early green berry showing
Angel Valley	24	2019-05-14	15:27:00	15:32:00	Duke	547	Petal Fall	540	0	5	POINT (-122.71026585988857 44.706431696083428)	Joshr	61 degrees, pollinator study, >50% of buds still on plants and pollinatable. early green berry showing
Angel Valley	25	2019-05-14	15:27:00	15:32:00	Duke	547	Petal Fall	540	0	5	POINT (-122.71021600274597 44.706349015538777)	Joshr	61 degrees, pollinator study, >50% of buds still on plants and pollinatable. early green berry showing
Angel Valley	26	2019-05-14	15:27:00	15:32:00	Duke	547	Petal Fall	540	0	3	POINT (-122.71016060592088 44.706191528460351)	Joshr	61 degrees, pollinator study, >50% of buds still on plants and pollinatable. early green berry showing
Angel Valley	27	2019-05-14	15:27:00	15:32:00	Duke	547	Petal Fall	540	0	0	POINT (-122.71008859004823 44.706093098818776)	Joshr	61 degrees, pollinator study, >50% of buds still on plants and pollinatable. early green berry showing
Angel Valley	28	2019-05-14	15:27:00	15:32:00	Duke	547	Petal Fall	540	0	2	POINT (-122.7100664313182 44.706006480595732)	Joshr	61 degrees, pollinator study, >50% of buds still on plants and pollinatable. early green berry showing
Angel Valley	29	2019-05-14	15:27:00	15:32:00	Duke	547	Petal Fall	540	0	3	POINT (-122.71001657417558 44.705943485443029)	Joshr	61 degrees, pollinator study, >50% of buds still on plants and pollinatable. early green berry showing
Angel Valley	30	2019-05-14	15:27:00	15:32:00	Duke	547	Petal Fall	540	0	4	POINT (-122.70997779639801 44.705884427425104)	Joshr	61 degrees, pollinator study, >50% of buds still on plants and pollinatable. early green berry showing
Eden	1	2019-05-14	12:36:00	12:41:00	Liberty	1032	Early Green Fruit	538	0	0	POINT (-122.85576649313774 45.055146604563056)	Joshr	pollinator survey 55 degrees, sprinkling rain, about %25 of buds still available for pollination. lots of petal fall
Eden	2	2019-05-14	12:36:00	12:41:00	Liberty	1032	Early Green Fruit	538	0	0	POINT (-122.85577551740786 45.055015917366987)	Joshr	pollinator survey 55 degrees, sprinkling rain, about %25 of buds still available for pollination. lots of petal fall
Eden	3	2019-05-14	12:36:00	12:41:00	Liberty	1032	Early Green Fruit	538	0	0	POINT (-122.85576649313774 45.054882042368639)	Joshr	pollinator survey 55 degrees, sprinkling rain, about %25 of buds still available for pollination. lots of petal fall
Eden	4	2019-05-14	12:36:00	12:41:00	Liberty	1032	Early Green Fruit	538	0	0	POINT (-122.85578002954294 45.054732229498931)	Joshr	pollinator survey 55 degrees, sprinkling rain, about %25 of buds still available for pollination. lots of petal fall
Eden	5	2019-05-14	12:36:00	12:41:00	Liberty	1032	Early Green Fruit	538	0	2	POINT (-122.85576649313774 45.054569666153718)	Joshr	pollinator survey 55 degrees, sprinkling rain, about %25 of buds still available for pollination. lots of petal fall
Eden	6	2019-05-14	12:36:00	12:41:00	Liberty	1032	Early Green Fruit	538	0	0	POINT (-122.85580259021829 45.054416664936127)	Joshr	pollinator survey 55 degrees, sprinkling rain, about %25 of buds still available for pollination. lots of petal fall
Eden	7	2019-05-14	12:36:00	12:41:00	Liberty	1032	Early Green Fruit	538	0	0	POINT (-122.85577100527281 45.054212662675859)	Joshr	pollinator survey 55 degrees, sprinkling rain, about %25 of buds still available for pollination. lots of petal fall
Eden	8	2019-05-14	12:36:00	12:41:00	Liberty	1032	Early Green Fruit	538	0	1	POINT (-122.85576649313774 45.054066035601821)	Joshr	pollinator survey 55 degrees, sprinkling rain, about %25 of buds still available for pollination. lots of petal fall
Eden	9	2019-05-14	12:36:00	12:41:00	Liberty	1032	Early Green Fruit	538	0	0	POINT (-122.85576649313774 45.053906657921011)	Joshr	pollinator survey 55 degrees, sprinkling rain, about %25 of buds still available for pollination. lots of petal fall
Eden	10	2019-05-14	12:36:00	12:41:00	Liberty	1032	Early Green Fruit	538	0	0	POINT (-122.85578454167802 45.053769592760247)	Joshr	pollinator survey 55 degrees, sprinkling rain, about %25 of buds still available for pollination. lots of petal fall
Eden	11	2019-05-14	12:36:00	12:41:00	Liberty	1032	Early Green Fruit	538	0	0	POINT (-122.85646477142518 45.054991090378962)	Joshr	pollinator survey 55 degrees, sprinkling rain, about %25 of buds still available for pollination. lots of petal fall
Eden	12	2019-05-14	12:36:00	12:41:00	Liberty	1032	Early Green Fruit	538	0	0	POINT (-122.85641282570531 45.053740794606654)	Joshr	pollinator survey 55 degrees, sprinkling rain, about %25 of buds still available for pollination. lots of petal fall
Eden	13	2019-05-14	12:36:00	12:41:00	Liberty	1032	Early Green Fruit	538	0	0	POINT (-122.85643107375313 45.054633648433523)	Joshr	pollinator survey 55 degrees, sprinkling rain, about %25 of buds still available for pollination. lots of petal fall
Eden	14	2019-05-14	12:36:00	12:41:00	Liberty	1032	Early Green Fruit	538	0	0	POINT (-122.8564539101221 45.054787762769145)	Joshr	pollinator survey 55 degrees, sprinkling rain, about %25 of buds still available for pollination. lots of petal fall
Eden	15	2019-05-14	12:36:00	12:41:00	Liberty	1032	Early Green Fruit	538	0	0	POINT (-122.85641968492445 45.054113856532737)	Joshr	pollinator survey 55 degrees, sprinkling rain, about %25 of buds still available for pollination. lots of petal fall
Eden	16	2019-05-14	12:36:00	12:41:00	Liberty	1032	Early Green Fruit	538	0	0	POINT (-122.85641002570529 45.054375749743983)	Joshr	pollinator survey 55 degrees, sprinkling rain, about %25 of buds still available for pollination. lots of petal fall
Eden	17	2019-05-14	12:36:00	12:41:00	Liberty	1032	Early Green Fruit	538	0	1	POINT (-122.85643853297229 45.05447038939738)	Joshr	pollinator survey 55 degrees, sprinkling rain, about %25 of buds still available for pollination. lots of petal fall
Eden	18	2019-05-14	12:36:00	12:41:00	Liberty	1032	Early Green Fruit	538	0	2	POINT (-122.85638864804785 45.05382334856948)	Joshr	pollinator survey 55 degrees, sprinkling rain, about %25 of buds still available for pollination. lots of petal fall
Eden	19	2019-05-14	12:36:00	12:41:00	Liberty	1032	Early Green Fruit	538	0	1	POINT (-122.85640819609569 45.0539694760786)	Joshr	pollinator survey 55 degrees, sprinkling rain, about %25 of buds still available for pollination. lots of petal fall
Eden	20	2019-05-14	12:36:00	12:41:00	Liberty	1032	Early Green Fruit	538	0	1	POINT (-122.85643057375316 45.054253143285941)	Joshr	pollinator survey 55 degrees, sprinkling rain, about %25 of buds still available for pollination. lots of petal fall
Eden	21	2019-05-14	12:36:00	12:41:00	Liberty	1032	Early Green Fruit	538	0	0	POINT (-122.85745 45.053753641273104)	Joshr	pollinator survey 55 degrees, sprinkling rain, about %25 of buds still available for pollination. lots of petal fall
Eden	22	2019-05-14	12:36:00	12:41:00	Liberty	1032	Early Green Fruit	538	0		POINT (-122.8574943257053 45.053901668950544)	Joshr	pollinator survey 55 degrees, sprinkling rain, about %25 of buds still available for pollination. lots of petal fall
Eden	23	2019-05-14	12:36:00	12:41:00	Liberty	1032	Early Green Fruit	538	0	1	POINT (-122.85749835531486 45.0540639296183)	Joshr	pollinator survey 55 degrees, sprinkling rain, about %25 of buds still available for pollination. lots of petal fall
Eden	24	2019-05-14	12:36:00	12:41:00	Liberty	1032	Early Green Fruit	538	0	0	POINT (-122.85750641453399 45.054240423155264)	Joshr	pollinator survey 55 degrees, sprinkling rain, about %25 of buds still available for pollination. lots of petal fall
Eden	25	2019-05-14	12:36:00	12:41:00	Liberty	1032	Early Green Fruit	538	0	0	POINT (-122.85748223687656 45.054391296230811)	Joshr	pollinator survey 55 degrees, sprinkling rain, about %25 of buds still available for pollination. lots of petal fall
Eden	26	2019-05-14	12:36:00	12:41:00	Liberty	1032	Early Green Fruit	538	0	2	POINT (-122.85750641453399 45.054530782305029)	Joshr	pollinator survey 55 degrees, sprinkling rain, about %25 of buds still available for pollination. lots of petal fall
Eden	27	2019-05-14	12:36:00	12:41:00	Liberty	1032	Early Green Fruit	538	0	0	POINT (-122.85750238492443 45.054664574750419)	Joshr	pollinator survey 55 degrees, sprinkling rain, about %25 of buds still available for pollination. lots of petal fall
Eden	28	2019-05-14	12:36:00	12:41:00	Liberty	1032	Early Green Fruit	538	0	0	POINT (-122.85753059219142 45.054806906795569)	Joshr	pollinator survey 55 degrees, sprinkling rain, about %25 of buds still available for pollination. lots of petal fall
Eden	29	2019-05-14	12:36:00	12:41:00	Liberty	1032	Early Green Fruit	538	0	1	POINT (-122.857534621801 45.054943545225569)	Joshr	pollinator survey 55 degrees, sprinkling rain, about %25 of buds still available for pollination. lots of petal fall
Eden	30	2019-05-14	12:36:00	12:41:00	Liberty	1032	Early Green Fruit	538	0	0	POINT (-122.85753865141056 45.055088723199752)	Joshr	pollinator survey 55 degrees, sprinkling rain, about %25 of buds still available for pollination. lots of petal fall
PanAm	1	2019-05-13	12:22:00	15:38:00	Liberty	474	Petal Fall	519	0	5	POINT (-122.94572018156171 45.013640656572733)	jeannettek	62F, wind 6mph, mostly sunny. started 225pm. 30 to 40% bloom left
PanAm	2	2019-05-13	12:22:00	15:38:00	Liberty	474	Petal Fall	519	0	8	POINT (-122.945708092733 45.01383436688036)	jeannettek	62F, wind 6mph, mostly sunny. started 225pm. 30 to 40% bloom left
PanAm	3	2019-05-13	12:22:00	15:38:00	Liberty	474	Petal Fall	519	0	1	POINT (-122.9456960039043 45.013919827101873)	jeannettek	62F, wind 6mph, mostly sunny. started 225pm. 30 to 40% bloom left
PanAm	4	2019-05-13	12:22:00	15:38:00	Liberty	474	Petal Fall	519	0	4	POINT (-122.94577256648613 45.014315791130571)	jeannettek	62F, wind 6mph, mostly sunny. started 225pm. 30 to 40% bloom left
PanAm	5	2019-05-13	12:22:00	15:38:00	Liberty	474	Petal Fall	519	0	8	POINT (-122.94571212234256 45.0144468289832)	jeannettek	62F, wind 6mph, mostly sunny. started 225pm. 30 to 40% bloom left
PanAm	6	2019-05-13	12:22:00	15:38:00	Liberty	474	Petal Fall	519	0	3	POINT (-122.94572421117132 45.015005160820692)	jeannettek	62F, wind 6mph, mostly sunny. started 225pm. 30 to 40% bloom left
PanAm	7	2019-05-13	12:22:00	15:38:00	Liberty	474	Petal Fall	519	0	3	POINT (-122.94572018156177 45.015190320687275)	jeannettek	62F, wind 6mph, mostly sunny. started 225pm. 30 to 40% bloom left
PanAm	8	2019-05-13	12:22:00	15:38:00	Liberty	474	Petal Fall	519	0	2	POINT (-122.94568794468519 45.015358388355516)	jeannettek	62F, wind 6mph, mostly sunny. started 225pm. 30 to 40% bloom left
PanAm	9	2019-05-13	12:22:00	15:38:00	Liberty	474	Petal Fall	519	0	2	POINT (-122.94570112234258 45.015527855484628)	jeannettek	62F, wind 6mph, mostly sunny. started 225pm. 30 to 40% bloom left
PanAm	10	2019-05-13	12:22:00	15:38:00	Liberty	474	Petal Fall	519	0	5	POINT (-122.94571724078088 45.015681679242611)	jeannettek	62F, wind 6mph, mostly sunny. started 225pm. 30 to 40% bloom left
PanAm	11	2019-05-13	12:22:00	15:38:00	Liberty	474	Petal Fall	519	0	0	POINT (-122.94407352849026 45.015716036943928)	jeannettek	62F, wind 6mph, mostly sunny. started 225pm. 30 to 40% bloom left
PanAm	12	2019-05-13	12:22:00	15:38:00	Liberty	474	Petal Fall	519	0	6	POINT (-122.94410576536684 45.015525181593325)	jeannettek	62F, wind 6mph, mostly sunny. started 225pm. 30 to 40% bloom left
PanAm	13	2019-05-13	12:22:00	15:38:00	Liberty	474	Petal Fall	519	0	1	POINT (-122.94408158770941 45.015342871410688)	jeannettek	62F, wind 6mph, mostly sunny. started 225pm. 30 to 40% bloom left
PanAm	14	2019-05-13	12:22:00	15:38:00	Liberty	474	Petal Fall	519	0	5	POINT (-122.944085617319 45.01504376751015)	jeannettek	62F, wind 6mph, mostly sunny. started 225pm. 30 to 40% bloom left
PanAm	15	2019-05-13	12:22:00	15:38:00	Liberty	474	Petal Fall	519	0	0	POINT (-122.94405741005201 45.014858607169742)	jeannettek	62F, wind 6mph, mostly sunny. started 225pm. 30 to 40% bloom left
PanAm	16	2019-05-13	12:22:00	15:38:00	Liberty	474	Petal Fall	519	0	4	POINT (-122.94410173575726 45.014419917204407)	jeannettek	62F, wind 6mph, mostly sunny. started 225pm. 30 to 40% bloom left
PanAm	17	2019-05-13	12:22:00	15:38:00	Liberty	474	Petal Fall	519	0	2	POINT (-122.94406949888071 45.014266090057149)	jeannettek	62F, wind 6mph, mostly sunny. started 225pm. 30 to 40% bloom left
PanAm	18	2019-05-13	12:22:00	15:38:00	Liberty	474	Petal Fall	519	0	2	POINT (-122.94407352849026 45.014149295095315)	jeannettek	62F, wind 6mph, mostly sunny. started 225pm. 30 to 40% bloom left
PanAm	19	2019-05-13	12:22:00	15:38:00	Liberty	474	Petal Fall	519	0	1	POINT (-122.94402517317543 45.013793211424428)	jeannettek	62F, wind 6mph, mostly sunny. started 225pm. 30 to 40% bloom left
PanAm	20	2019-05-13	12:22:00	15:38:00	Liberty	474	Petal Fall	519	0	5	POINT (-122.94409770614777 45.013605198353055)	jeannettek	62F, wind 6mph, mostly sunny. started 225pm. 30 to 40% bloom left
PanAm	21	2019-05-13	12:22:00	15:38:00	Liberty	474	Petal Fall	519	0	0	POINT (-122.94720453512699 45.01468484076716)	jeannettek	62F, wind 6mph, mostly sunny. started 225pm. 30 to 40% bloom left
PanAm	22	2019-05-13	12:22:00	15:38:00	Liberty	474	Petal Fall	519	0	2	POINT (-122.94720678780281 45.014724313575364)	jeannettek	62F, wind 6mph, mostly sunny. started 225pm. 30 to 40% bloom left
PanAm	23	2019-05-13	12:22:00	15:38:00	Liberty	474	Petal Fall	519	0	2	POINT (-122.94719838900068 45.014741277354389)	jeannettek	62F, wind 6mph, mostly sunny. started 225pm. 30 to 40% bloom left
PanAm	24	2019-05-13	12:22:00	15:38:00	Liberty	474	Petal Fall	519	0	2	POINT (-122.94719630937928 45.01476416353151)	jeannettek	62F, wind 6mph, mostly sunny. started 225pm. 30 to 40% bloom left
PanAm	25	2019-05-13	12:22:00	15:38:00	Liberty	474	Petal Fall	519	0	3	POINT (-122.94718621226777 45.014797367823654)	jeannettek	62F, wind 6mph, mostly sunny. started 225pm. 30 to 40% bloom left
PanAm	26	2019-05-13	12:22:00	15:38:00	Liberty	474	Petal Fall	519	0	1	POINT (-122.94719323773765 45.014860915639943)	jeannettek	62F, wind 6mph, mostly sunny. started 225pm. 30 to 40% bloom left
PanAm	27	2019-05-13	12:22:00	15:38:00	Liberty	474	Petal Fall	519	0	2	POINT (-122.94718332640078 45.015316821587405)	jeannettek	62F, wind 6mph, mostly sunny. started 225pm. 30 to 40% bloom left
PanAm	28	2019-05-13	12:22:00	15:38:00	Liberty	474	Petal Fall	519	0	4	POINT (-122.94716919702805 45.01548091491825)	jeannettek	62F, wind 6mph, mostly sunny. started 225pm. 30 to 40% bloom left
PanAm	29	2019-05-13	12:22:00	15:38:00	Liberty	474	Petal Fall	519	0	2	POINT (-122.94719033115419 45.015625052476025)	jeannettek	62F, wind 6mph, mostly sunny. started 225pm. 30 to 40% bloom left
PanAm	30	2019-05-13	12:22:00	15:38:00	Liberty	474	Petal Fall	519	0	5	POINT (-122.94717011591514 45.015753637067036)	jeannettek	62F, wind 6mph, mostly sunny. started 225pm. 30 to 40% bloom left
LM	1	2019-05-13	15:05:00	15:11:00	Duke	838	Early Green Fruit	528	0	0	POINT (-122.85728937375315 44.984775036012046)	Joshr	pollinator survey 68 degrees. lots of early green berry, about 25%-50% of petals yet to fall. Overhead sprinklers were on in the field closest to sites 1-10 and some spray overlap was occurring, may account for low number of pollinators in those sites.
LM	2	2019-05-13	15:05:00	15:11:00	Duke	838	Early Green Fruit	528	0	0	POINT (-122.85732966984887 44.985048647004092)	Joshr	pollinator survey 68 degrees. lots of early green berry, about 25%-50% of petals yet to fall. Overhead sprinklers were on in the field closest to sites 1-10 and some spray overlap was occurring, may account for low number of pollinators in those sites.
LM	3	2019-05-13	15:05:00	15:11:00	Duke	838	Early Green Fruit	528	0	0	POINT (-122.8573216106297 44.985213953012277)	Joshr	pollinator survey 68 degrees. lots of early green berry, about 25%-50% of petals yet to fall. Overhead sprinklers were on in the field closest to sites 1-10 and some spray overlap was occurring, may account for low number of pollinators in those sites.
LM	4	2019-05-13	15:05:00	15:11:00	Duke	838	Early Green Fruit	528	0	0	POINT (-122.857309521801 44.984495723443992)	Joshr	pollinator survey 68 degrees. lots of early green berry, about 25%-50% of petals yet to fall. Overhead sprinklers were on in the field closest to sites 1-10 and some spray overlap was occurring, may account for low number of pollinators in those sites.
LM	5	2019-05-13	15:05:00	15:11:00	Duke	838	Early Green Fruit	528	0	1	POINT (-122.85731355141057 44.9853678581776)	Joshr	pollinator survey 68 degrees. lots of early green berry, about 25%-50% of petals yet to fall. Overhead sprinklers were on in the field closest to sites 1-10 and some spray overlap was occurring, may account for low number of pollinators in those sites.
LM	6	2019-05-13	15:05:00	15:11:00	Duke	838	Early Green Fruit	528	0	0	POINT (-122.85731758102014 44.9855759145035)	Joshr	pollinator survey 68 degrees. lots of early green berry, about 25%-50% of petals yet to fall. Overhead sprinklers were on in the field closest to sites 1-10 and some spray overlap was occurring, may account for low number of pollinators in those sites.
LM	7	2019-05-13	15:05:00	15:11:00	Duke	838	Early Green Fruit	528	0	2	POINT (-122.85733772906799 44.985744069064467)	Joshr	pollinator survey 68 degrees. lots of early green berry, about 25%-50% of petals yet to fall. Overhead sprinklers were on in the field closest to sites 1-10 and some spray overlap was occurring, may account for low number of pollinators in those sites.
LM	8	2019-05-13	15:05:00	15:11:00	Duke	838	Early Green Fruit	528	0	0	POINT (-122.857309521801 44.984310464357364)	Joshr	pollinator survey 68 degrees. lots of early green berry, about 25%-50% of petals yet to fall. Overhead sprinklers were on in the field closest to sites 1-10 and some spray overlap was occurring, may account for low number of pollinators in those sites.
LM	9	2019-05-13	15:05:00	15:11:00	Duke	838	Early Green Fruit	528	0	0	POINT (-122.85731355141057 44.984643930282232)	Joshr	pollinator survey 68 degrees. lots of early green berry, about 25%-50% of petals yet to fall. Overhead sprinklers were on in the field closest to sites 1-10 and some spray overlap was occurring, may account for low number of pollinators in those sites.
LM	10	2019-05-13	15:05:00	15:11:00	Duke	838	Early Green Fruit	528	0	1	POINT (-122.85730549219143 44.984903291327157)	Joshr	pollinator survey 68 degrees. lots of early green berry, about 25%-50% of petals yet to fall. Overhead sprinklers were on in the field closest to sites 1-10 and some spray overlap was occurring, may account for low number of pollinators in those sites.
LM	11	2019-05-13	15:05:00	15:11:00	Duke	838	Early Green Fruit	528	0	0	POINT (-122.85700542960956 44.984318507679554)	Joshr	pollinator survey 68 degrees. lots of early green berry, about 25%-50% of petals yet to fall. Overhead sprinklers were on in the field closest to sites 1-10 and some spray overlap was occurring, may account for low number of pollinators in those sites.
LM	12	2019-05-13	15:05:00	15:11:00	Duke	838	Early Green Fruit	528	0	0	POINT (-122.85702154804785 44.984500916605306)	Joshr	pollinator survey 68 degrees. lots of early green berry, about 25%-50% of petals yet to fall. Overhead sprinklers were on in the field closest to sites 1-10 and some spray overlap was occurring, may account for low number of pollinators in those sites.
LM	13	2019-05-13	15:05:00	15:11:00	Duke	838	Early Green Fruit	528	0	0	POINT (-122.8570134888287 44.984671924446104)	Joshr	pollinator survey 68 degrees. lots of early green berry, about 25%-50% of petals yet to fall. Overhead sprinklers were on in the field closest to sites 1-10 and some spray overlap was occurring, may account for low number of pollinators in those sites.
LM	14	2019-05-13	15:05:00	15:11:00	Duke	838	Early Green Fruit	528	0	2	POINT (-122.857029607267 44.984811580470989)	Joshr	pollinator survey 68 degrees. lots of early green berry, about 25%-50% of petals yet to fall. Overhead sprinklers were on in the field closest to sites 1-10 and some spray overlap was occurring, may account for low number of pollinators in those sites.
LM	15	2019-05-13	15:05:00	15:11:00	Duke	838	Early Green Fruit	528	0	1	POINT (-122.857029607267 44.984971186939966)	Joshr	pollinator survey 68 degrees. lots of early green berry, about 25%-50% of petals yet to fall. Overhead sprinklers were on in the field closest to sites 1-10 and some spray overlap was occurring, may account for low number of pollinators in those sites.
LM	16	2019-05-13	15:05:00	15:11:00	Duke	838	Early Green Fruit	528	0	6	POINT (-122.85702154804785 44.985122242653091)	Joshr	pollinator survey 68 degrees. lots of early green berry, about 25%-50% of petals yet to fall. Overhead sprinklers were on in the field closest to sites 1-10 and some spray overlap was occurring, may account for low number of pollinators in those sites.
LM	17	2019-05-13	15:05:00	15:11:00	Duke	838	Early Green Fruit	528	0	1	POINT (-122.85702557765741 44.9853217495887)	Joshr	pollinator survey 68 degrees. lots of early green berry, about 25%-50% of petals yet to fall. Overhead sprinklers were on in the field closest to sites 1-10 and some spray overlap was occurring, may account for low number of pollinators in those sites.
LM	18	2019-05-13	15:05:00	15:11:00	Duke	838	Early Green Fruit	528	0	0	POINT (-122.85704169609571 44.985481354637287)	Joshr	pollinator survey 68 degrees. lots of early green berry, about 25%-50% of petals yet to fall. Overhead sprinklers were on in the field closest to sites 1-10 and some spray overlap was occurring, may account for low number of pollinators in those sites.
LM	19	2019-05-13	15:05:00	15:11:00	Duke	838	Early Green Fruit	528	0	2	POINT (-122.85704572570526 44.985697960778147)	Joshr	pollinator survey 68 degrees. lots of early green berry, about 25%-50% of petals yet to fall. Overhead sprinklers were on in the field closest to sites 1-10 and some spray overlap was occurring, may account for low number of pollinators in those sites.
LM	20	2019-05-13	15:05:00	15:11:00	Duke	838	Early Green Fruit	528	0	3	POINT (-122.8570819921914 44.985866114981064)	Joshr	pollinator survey 68 degrees. lots of early green berry, about 25%-50% of petals yet to fall. Overhead sprinklers were on in the field closest to sites 1-10 and some spray overlap was occurring, may account for low number of pollinators in those sites.
LM	21	2019-05-13	15:05:00	15:11:00	Duke	838	Early Green Fruit	528	0	2	POINT (-122.8566890111713 44.984340859891546)	Joshr	pollinator survey 68 degrees. lots of early green berry, about 25%-50% of petals yet to fall. Overhead sprinklers were on in the field closest to sites 1-10 and some spray overlap was occurring, may account for low number of pollinators in those sites.
LM	22	2019-05-13	15:05:00	15:11:00	Duke	838	Early Green Fruit	528	5	0	POINT (-122.85669304078088 44.984528969013553)	Joshr	pollinator survey 68 degrees. lots of early green berry, about 25%-50% of petals yet to fall. Overhead sprinklers were on in the field closest to sites 1-10 and some spray overlap was occurring, may account for low number of pollinators in those sites.
LM	23	2019-05-13	15:05:00	15:11:00	Duke	838	Early Green Fruit	528	0	0	POINT (-122.85670110000001 44.984665775260048)	Joshr	pollinator survey 68 degrees. lots of early green berry, about 25%-50% of petals yet to fall. Overhead sprinklers were on in the field closest to sites 1-10 and some spray overlap was occurring, may account for low number of pollinators in those sites.
LM	24	2019-05-13	15:05:00	15:11:00	Duke	838	Early Green Fruit	528	0	1	POINT (-122.85671721843831 44.984828232253705)	Joshr	pollinator survey 68 degrees. lots of early green berry, about 25%-50% of petals yet to fall. Overhead sprinklers were on in the field closest to sites 1-10 and some spray overlap was occurring, may account for low number of pollinators in those sites.
LM	25	2019-05-13	15:05:00	15:11:00	Duke	838	Early Green Fruit	528	0	0	POINT (-122.85669707039044 44.984953637337455)	Joshr	pollinator survey 68 degrees. lots of early green berry, about 25%-50% of petals yet to fall. Overhead sprinklers were on in the field closest to sites 1-10 and some spray overlap was occurring, may account for low number of pollinators in those sites.
LM	26	2019-05-13	15:05:00	15:11:00	Duke	838	Early Green Fruit	528	0	1	POINT (-122.85670512960957 44.985104693096837)	Joshr	pollinator survey 68 degrees. lots of early green berry, about 25%-50% of petals yet to fall. Overhead sprinklers were on in the field closest to sites 1-10 and some spray overlap was occurring, may account for low number of pollinators in those sites.
LM	27	2019-05-13	15:05:00	15:11:00	Duke	838	Early Green Fruit	528	0	2	POINT (-122.85669707039044 44.985341251316491)	Joshr	pollinator survey 68 degrees. lots of early green berry, about 25%-50% of petals yet to fall. Overhead sprinklers were on in the field closest to sites 1-10 and some spray overlap was occurring, may account for low number of pollinators in those sites.
LM	28	2019-05-13	15:05:00	15:11:00	Duke	838	Early Green Fruit	528	0	4	POINT (-122.85667692234257 44.985577808559938)	Joshr	pollinator survey 68 degrees. lots of early green berry, about 25%-50% of petals yet to fall. Overhead sprinklers were on in the field closest to sites 1-10 and some spray overlap was occurring, may account for low number of pollinators in those sites.
LM	29	2019-05-13	15:05:00	15:11:00	Duke	838	Early Green Fruit	528	0	1	POINT (-122.85670110000001 44.985939767753713)	Joshr	pollinator survey 68 degrees. lots of early green berry, about 25%-50% of petals yet to fall. Overhead sprinklers were on in the field closest to sites 1-10 and some spray overlap was occurring, may account for low number of pollinators in those sites.
LM	30	2019-05-13	15:05:00	15:11:00	Duke	838	Early Green Fruit	528	0	5	POINT (-122.85670110000001 44.98577161376685)	Joshr	pollinator survey 68 degrees. lots of early green berry, about 25%-50% of petals yet to fall. Overhead sprinklers were on in the field closest to sites 1-10 and some spray overlap was occurring, may account for low number of pollinators in those sites.
Five Oaks	1	2019-05-13	12:55:00	14:13:00	Duke	983	Early Green Fruit	527	0	6	POINT (-122.91215192411741 45.0226221061997)	Joshr	pollinator study, 63 degrees.
Five Oaks	2	2019-05-13	12:55:00	14:13:00	Duke	983	Early Green Fruit	527	0	0	POINT (-122.91215778549196 45.022783682228734)	Joshr	pollinator study, 63 degrees.
Five Oaks	3	2019-05-13	12:55:00	14:13:00	Duke	983	Early Green Fruit	527	0	3	POINT (-122.91215778549196 45.022916257091438)	Joshr	pollinator study, 63 degrees.
Five Oaks	4	2019-05-13	12:55:00	14:13:00	Duke	983	Early Green Fruit	527	0	0	POINT (-122.91217536961562 45.023081975238135)	Joshr	pollinator study, 63 degrees.
Five Oaks	5	2019-05-13	12:55:00	14:13:00	Duke	983	Early Green Fruit	527	0	2	POINT (-122.91217536961562 45.02345069639339)	Joshr	pollinator study, 63 degrees.
Five Oaks	6	2019-05-13	12:55:00	14:13:00	Duke	983	Early Green Fruit	527	0	3	POINT (-122.91215778549196 45.023276693447507)	Joshr	pollinator study, 63 degrees.
Five Oaks	7	2019-05-13	12:55:00	14:13:00	Duke	983	Early Green Fruit	527	0	0	POINT (-122.91218123099017 45.023612270083909)	Joshr	pollinator study, 63 degrees.
Five Oaks	8	2019-05-13	12:55:00	14:13:00	Duke	983	Early Green Fruit	527	0	3	POINT (-122.91219295373926 45.023823558068038)	Joshr	pollinator study, 63 degrees.
Five Oaks	9	2019-05-13	12:55:00	14:13:00	Duke	983	Early Green Fruit	527	0	0	POINT (-122.91220467648837 45.024047273907179)	Joshr	pollinator study, 63 degrees.
Five Oaks	10	2019-05-13	12:55:00	14:13:00	Duke	983	Early Green Fruit	527	0	0	POINT (-122.91221053786295 45.024341417476364)	Joshr	pollinator study, 63 degrees.
Five Oaks	11	2019-05-13	12:55:00	14:13:00	Duke	983	Early Green Fruit	527	0	1	POINT (-122.91126499326576 45.022302843186282)	Joshr	pollinator study, 63 degrees.
Five Oaks	12	2019-05-13	12:55:00	14:13:00	Duke	983	Early Green Fruit	527	0	0	POINT (-122.91129818232682 45.022549162924605)	Joshr	pollinator study, 63 degrees.
Five Oaks	13	2019-05-13	12:55:00	14:13:00	Duke	983	Early Green Fruit	527	0	2	POINT (-122.9113479659184 45.023249017985094)	Joshr	pollinator study, 63 degrees.
Five Oaks	14	2019-05-13	12:55:00	14:13:00	Duke	983	Early Green Fruit	527	0	0	POINT (-122.91135349742858 45.023491423888281)	Joshr	pollinator study, 63 degrees.
Five Oaks	15	2019-05-13	12:55:00	14:13:00	Duke	983	Early Green Fruit	527	0	2	POINT (-122.9113700919591 45.02377292622969)	Joshr	pollinator study, 63 degrees.
Five Oaks	16	2019-05-13	12:55:00	14:13:00	Duke	983	Early Green Fruit	527	0	0	POINT (-122.91138668648962 45.024015329914533)	Joshr	pollinator study, 63 degrees.
Five Oaks	17	2019-05-13	12:55:00	14:13:00	Duke	983	Early Green Fruit	527	0	3	POINT (-122.91132030836751 45.02274465402607)	Joshr	pollinator study, 63 degrees.
Five Oaks	18	2019-05-13	12:55:00	14:13:00	Duke	983	Early Green Fruit	527	0	2	POINT (-122.91141987555065 45.024242093722734)	Joshr	pollinator study, 63 degrees.
Five Oaks	19	2019-05-13	12:55:00	14:13:00	Duke	983	Early Green Fruit	527	0	0	POINT (-122.91144200159135 45.024429759643354)	Joshr	pollinator study, 63 degrees.
Five Oaks	20	2019-05-13	12:55:00	14:13:00	Duke	983	Early Green Fruit	527	0	4	POINT (-122.91130924534717 45.022979242466711)	Joshr	pollinator study, 63 degrees.
Five Oaks	21	2019-05-13	12:55:00	14:13:00	Duke	983	Early Green Fruit	527	0	7	POINT (-122.91050617039042 45.022126254716994)	Joshr	pollinator study, 63 degrees.
Five Oaks	22	2019-05-13	12:55:00	14:13:00	Duke	983	Early Green Fruit	527	0	2	POINT (-122.9105105 45.022320136318712)	Joshr	pollinator study, 63 degrees.
Five Oaks	23	2019-05-13	12:55:00	14:13:00	Duke	983	Early Green Fruit	527	0	3	POINT (-122.91048652234258 45.022508220775727)	Joshr	pollinator study, 63 degrees.
Five Oaks	24	2019-05-13	12:55:00	14:13:00	Duke	983	Early Green Fruit	527	0	2	POINT (-122.91051885921915 45.022699152850088)	Joshr	pollinator study, 63 degrees.
Five Oaks	25	2019-05-13	12:55:00	14:13:00	Duke	983	Early Green Fruit	527	0	0	POINT (-122.91050677039041 45.02292985943506)	Joshr	pollinator study, 63 degrees.
Five Oaks	26	2019-05-13	12:55:00	14:13:00	Duke	983	Early Green Fruit	527	0	1	POINT (-122.91051080000001 45.023160565090343)	Joshr	pollinator study, 63 degrees.
Five Oaks	27	2019-05-13	12:55:00	14:13:00	Duke	983	Early Green Fruit	527	0	0	POINT (-122.91049065195213 45.023456778395648)	Joshr	pollinator study, 63 degrees.
Five Oaks	28	2019-05-13	12:55:00	14:13:00	Duke	983	Early Green Fruit	527	0	3	POINT (-122.91049065195213 45.023752990168347)	Joshr	pollinator study, 63 degrees.
Five Oaks	29	2019-05-13	12:55:00	14:13:00	Duke	983	Early Green Fruit	527	0	3	POINT (-122.91048662234257 45.024049200408406)	Joshr	pollinator study, 63 degrees.
Five Oaks	30	2019-05-13	12:55:00	14:13:00	Duke	983	Early Green Fruit	527	0	2	POINT (-122.9104946815617 45.024376738793336)	Joshr	pollinator study, 63 degrees.
Five Oaks	1	2019-05-13	11:39:00	12:25:00	Duke	984	Early Green Fruit	526	0	1	POINT (-122.89764629096256 45.010313473879712)	Joshr	pollinator study, 59 degrees, early green berry, few pollinateable buds left on Bush. approx. half bee boxes already removed from field. >90% of surveyed pollinator sites were single bees on the Bush making multiple stops.
Five Oaks	2	2019-05-13	11:39:00	12:25:00	Duke	984	Early Green Fruit	526	0	0	POINT (-122.89827269493348 45.010303950120687)	Joshr	pollinator study, 59 degrees, early green berry, few pollinateable buds left on Bush. approx. half bee boxes already removed from field. >90% of surveyed pollinator sites were single bees on the Bush making multiple stops.
Five Oaks	3	2019-05-13	11:39:00	12:25:00	Duke	984	Early Green Fruit	526	0	0	POINT (-122.89787529886588 45.010308712000395)	Joshr	pollinator study, 59 degrees, early green berry, few pollinateable buds left on Bush. approx. half bee boxes already removed from field. >90% of surveyed pollinator sites were single bees on the Bush making multiple stops.
Five Oaks	4	2019-05-13	11:39:00	12:25:00	Duke	984	Early Green Fruit	526	0	1	POINT (-122.89809757124269 45.010313473879712)	Joshr	pollinator study, 59 degrees, early green berry, few pollinateable buds left on Bush. approx. half bee boxes already removed from field. >90% of surveyed pollinator sites were single bees on the Bush making multiple stops.
Five Oaks	5	2019-05-13	11:39:00	12:25:00	Duke	984	Early Green Fruit	526	0	0	POINT (-122.89838046335858 45.010351568900028)	Joshr	pollinator study, 59 degrees, early green berry, few pollinateable buds left on Bush. approx. half bee boxes already removed from field. >90% of surveyed pollinator sites were single bees on the Bush making multiple stops.
Five Oaks	6	2019-05-13	11:39:00	12:25:00	Duke	984	Early Green Fruit	526	0	2	POINT (-122.89850843836338 45.01029918824058)	Joshr	pollinator study, 59 degrees, early green berry, few pollinateable buds left on Bush. approx. half bee boxes already removed from field. >90% of surveyed pollinator sites were single bees on the Bush making multiple stops.
Five Oaks	7	2019-05-13	11:39:00	12:25:00	Duke	984	Early Green Fruit	526	0	0	POINT (-122.89864988442135 45.010303950120687)	Joshr	pollinator study, 59 degrees, early green berry, few pollinateable buds left on Bush. approx. half bee boxes already removed from field. >90% of surveyed pollinator sites were single bees on the Bush making multiple stops.
Five Oaks	8	2019-05-13	11:39:00	12:25:00	Duke	984	Early Green Fruit	526	0	3	POINT (-122.89875091731989 45.010313473879712)	Joshr	pollinator study, 59 degrees, early green berry, few pollinateable buds left on Bush. approx. half bee boxes already removed from field. >90% of surveyed pollinator sites were single bees on the Bush making multiple stops.
Five Oaks	9	2019-05-13	11:39:00	12:25:00	Duke	984	Early Green Fruit	526	0	1	POINT (-122.89887889232467 45.010346807023865)	Joshr	pollinator study, 59 degrees, early green berry, few pollinateable buds left on Bush. approx. half bee boxes already removed from field. >90% of surveyed pollinator sites were single bees on the Bush making multiple stops.
Five Oaks	10	2019-05-13	11:39:00	12:25:00	Duke	984	Early Green Fruit	526	0	2	POINT (-122.89907422259519 45.010322997637161)	Joshr	pollinator study, 59 degrees, early green berry, few pollinateable buds left on Bush. approx. half bee boxes already removed from field. >90% of surveyed pollinator sites were single bees on the Bush making multiple stops.
Five Oaks	11	2019-05-13	11:39:00	12:25:00	Duke	984	Early Green Fruit	526	0	0	POINT (-122.89855505249372 45.009880475236933)	Joshr	pollinator study, 59 degrees, early green berry, few pollinateable buds left on Bush. approx. half bee boxes already removed from field. >90% of surveyed pollinator sites were single bees on the Bush making multiple stops.
Five Oaks	12	2019-05-13	11:39:00	12:25:00	Duke	984	Early Green Fruit	526	0	2	POINT (-122.89821010607059 45.009889721853952)	Joshr	pollinator study, 59 degrees, early green berry, few pollinateable buds left on Bush. approx. half bee boxes already removed from field. >90% of surveyed pollinator sites were single bees on the Bush making multiple stops.
Five Oaks	13	2019-05-13	11:39:00	12:25:00	Duke	984	Early Green Fruit	526	0	3	POINT (-122.89758438697751 45.009937152666168)	Joshr	pollinator study, 59 degrees, early green berry, few pollinateable buds left on Bush. approx. half bee boxes already removed from field. >90% of surveyed pollinator sites were single bees on the Bush making multiple stops.
Five Oaks	14	2019-05-13	11:39:00	12:25:00	Duke	984	Early Green Fruit	526	0	2	POINT (-122.89884398438285 45.009851386501715)	Joshr	pollinator study, 59 degrees, early green berry, few pollinateable buds left on Bush. approx. half bee boxes already removed from field. >90% of surveyed pollinator sites were single bees on the Bush making multiple stops.
Five Oaks	15	2019-05-13	11:39:00	12:25:00	Duke	984	Early Green Fruit	526	0	0	POINT (-122.89837059045345 45.009923608312967)	Joshr	pollinator study, 59 degrees, early green berry, few pollinateable buds left on Bush. approx. half bee boxes already removed from field. >90% of surveyed pollinator sites were single bees on the Bush making multiple stops.
Five Oaks	16	2019-05-13	11:39:00	12:25:00	Duke	984	Early Green Fruit	526	0	0	POINT (-122.89805668090686 45.009919110569172)	Joshr	pollinator study, 59 degrees, early green berry, few pollinateable buds left on Bush. approx. half bee boxes already removed from field. >90% of surveyed pollinator sites were single bees on the Bush making multiple stops.
Five Oaks	17	2019-05-13	11:39:00	12:25:00	Duke	984	Early Green Fruit	526	0	1	POINT (-122.8979163445719 45.009907915084042)	Joshr	pollinator study, 59 degrees, early green berry, few pollinateable buds left on Bush. approx. half bee boxes already removed from field. >90% of surveyed pollinator sites were single bees on the Bush making multiple stops.
Five Oaks	18	2019-05-13	11:39:00	12:25:00	Duke	984	Early Green Fruit	526	0	1	POINT (-122.89779605628479 45.009921759440395)	Joshr	pollinator study, 59 degrees, early green berry, few pollinateable buds left on Bush. approx. half bee boxes already removed from field. >90% of surveyed pollinator sites were single bees on the Bush making multiple stops.
Five Oaks	19	2019-05-13	11:39:00	12:25:00	Duke	984	Early Green Fruit	526	0	0	POINT (-122.8986704 45.0098147)	Joshr	pollinator study, 59 degrees, early green berry, few pollinateable buds left on Bush. approx. half bee boxes already removed from field. >90% of surveyed pollinator sites were single bees on the Bush making multiple stops.
Five Oaks	20	2019-05-13	11:39:00	12:25:00	Duke	984	Early Green Fruit	526	0	4	POINT (-122.89894705423168 45.009842039878571)	Joshr	pollinator study, 59 degrees, early green berry, few pollinateable buds left on Bush. approx. half bee boxes already removed from field. >90% of surveyed pollinator sites were single bees on the Bush making multiple stops.
Five Oaks	21	2019-05-13	11:39:00	12:25:00	Duke	984	Early Green Fruit	526	0	0	POINT (-122.89768814023925 45.0096216799659)	Joshr	pollinator study, 59 degrees, early green berry, few pollinateable buds left on Bush. approx. half bee boxes already removed from field. >90% of surveyed pollinator sites were single bees on the Bush making multiple stops.
Five Oaks	22	2019-05-13	11:39:00	12:25:00	Duke	984	Early Green Fruit	526	0	2	POINT (-122.89782534696471 45.00963097550995)	Joshr	pollinator study, 59 degrees, early green berry, few pollinateable buds left on Bush. approx. half bee boxes already removed from field. >90% of surveyed pollinator sites were single bees on the Bush making multiple stops.
Five Oaks	23	2019-05-13	11:39:00	12:25:00	Duke	984	Early Green Fruit	526	0	0	POINT (-122.8979504648614 45.009612382197069)	Joshr	pollinator study, 59 degrees, early green berry, few pollinateable buds left on Bush. approx. half bee boxes already removed from field. >90% of surveyed pollinator sites were single bees on the Bush making multiple stops.
Five Oaks	24	2019-05-13	11:39:00	12:25:00	Duke	984	Early Green Fruit	526	0	0	POINT (-122.89805140510069 45.009605684425104)	Joshr	pollinator study, 59 degrees, early green berry, few pollinateable buds left on Bush. approx. half bee boxes already removed from field. >90% of surveyed pollinator sites were single bees on the Bush making multiple stops.
Five Oaks	25	2019-05-13	11:39:00	12:25:00	Duke	984	Early Green Fruit	526	0	0	POINT (-122.89819254143566 45.00961627997075)	Joshr	pollinator study, 59 degrees, early green berry, few pollinateable buds left on Bush. approx. half bee boxes already removed from field. >90% of surveyed pollinator sites were single bees on the Bush making multiple stops.
Five Oaks	26	2019-05-13	11:39:00	12:25:00	Duke	984	Early Green Fruit	526	0	1	POINT (-122.89841829957165 45.009606933312746)	Joshr	pollinator study, 59 degrees, early green berry, few pollinateable buds left on Bush. approx. half bee boxes already removed from field. >90% of surveyed pollinator sites were single bees on the Bush making multiple stops.
Five Oaks	27	2019-05-13	11:39:00	12:25:00	Duke	984	Early Green Fruit	526	0	2	POINT (-122.89828925206537 45.00961627997075)	Joshr	pollinator study, 59 degrees, early green berry, few pollinateable buds left on Bush. approx. half bee boxes already removed from field. >90% of surveyed pollinator sites were single bees on the Bush making multiple stops.
Five Oaks	28	2019-05-13	11:39:00	12:25:00	Duke	984	Early Green Fruit	526	0	0	POINT (-122.89852366942047 45.009595437765846)	Joshr	pollinator study, 59 degrees, early green berry, few pollinateable buds left on Bush. approx. half bee boxes already removed from field. >90% of surveyed pollinator sites were single bees on the Bush making multiple stops.
Five Oaks	29	2019-05-13	11:39:00	12:25:00	Duke	984	Early Green Fruit	526	0	0	POINT (-122.89863356887894 45.009607033312641)	Joshr	pollinator study, 59 degrees, early green berry, few pollinateable buds left on Bush. approx. half bee boxes already removed from field. >90% of surveyed pollinator sites were single bees on the Bush making multiple stops.
Five Oaks	30	2019-05-13	11:39:00	12:25:00	Duke	984	Early Green Fruit	526	0	1	POINT (-122.89875918677564 45.009607433312382)	Joshr	pollinator study, 59 degrees, early green berry, few pollinateable buds left on Bush. approx. half bee boxes already removed from field. >90% of surveyed pollinator sites were single bees on the Bush making multiple stops.
Eden	1	2019-05-10	15:08:00	15:19:00	Duke	267	Petal Fall	498	0	3	POINT (-122.85593967429472 45.051867009436144)	Joshr	82 degrees, sunny, no wind, no clouds
Eden	2	2019-05-10	15:08:00	15:19:00	Duke	267	Petal Fall	498	0	6	POINT (-122.85593564468516 45.051753137974835)	Joshr	82 degrees, sunny, no wind, no clouds
Eden	3	2019-05-10	15:08:00	15:19:00	Duke	267	Petal Fall	498	0	1	POINT (-122.85592758546602 45.0517161297011)	Joshr	82 degrees, sunny, no wind, no clouds
Eden	4	2019-05-10	15:08:00	15:19:00	Duke	267	Petal Fall	498	0	3	POINT (-122.8559437039043 45.051659193848593)	Joshr	82 degrees, sunny, no wind, no clouds
Eden	5	2019-05-10	15:08:00	15:19:00	Duke	267	Petal Fall	498	0	5	POINT (-122.855955792733 45.051602257939393)	Joshr	82 degrees, sunny, no wind, no clouds
Eden	6	2019-05-10	15:08:00	15:19:00	Duke	267	Petal Fall	498	0	3	POINT (-122.85593564468516 45.051457071114363)	Joshr	82 degrees, sunny, no wind, no clouds
Eden	7	2019-05-10	15:08:00	15:19:00	Duke	267	Petal Fall	498	0	4	POINT (-122.85593564468516 45.0518129205203)	Joshr	82 degrees, sunny, no wind, no clouds
Eden	8	2019-05-10	15:08:00	15:19:00	Duke	267	Petal Fall	498	0	8	POINT (-122.8559437039043 45.051519700770363)	Joshr	82 degrees, sunny, no wind, no clouds
Eden	9	2019-05-10	15:08:00	15:19:00	Duke	267	Petal Fall	498	0	6	POINT (-122.85592758546602 45.051380207351919)	Joshr	82 degrees, sunny, no wind, no clouds
Eden	10	2019-05-10	15:08:00	15:19:00	Duke	267	Petal Fall	498	0	7	POINT (-122.85592758546602 45.051283415800384)	Joshr	82 degrees, sunny, no wind, no clouds
Eden	11	2019-05-10	15:08:00	15:19:00	Duke	267	Petal Fall	498	0	4	POINT (-122.85706559273298 45.051724997530947)	Joshr	82 degrees, sunny, no wind, no clouds
Eden	12	2019-05-10	15:08:00	15:19:00	Duke	267	Petal Fall	498	0	6	POINT (-122.85709932960958 45.051603185400538)	Joshr	82 degrees, sunny, no wind, no clouds
Eden	13	2019-05-10	15:08:00	15:19:00	Duke	267	Petal Fall	498	6	3	POINT (-122.85707505195215 45.051491460210833)	Joshr	82 degrees, sunny, no wind, no clouds
Eden	14	2019-05-10	15:08:00	15:19:00	Duke	267	Petal Fall	498	0	2	POINT (-122.85706669273301 45.051357460339837)	Joshr	82 degrees, sunny, no wind, no clouds
Eden	15	2019-05-10	15:08:00	15:19:00	Duke	267	Petal Fall	498	0	10	POINT (-122.85710768882871 45.0512016856375)	Joshr	82 degrees, sunny, no wind, no clouds
Eden	16	2019-05-10	15:08:00	15:19:00	Duke	267	Petal Fall	498	0	6	POINT (-122.85710838882873 45.05102293590658)	Joshr	82 degrees, sunny, no wind, no clouds
Eden	17	2019-05-10	15:08:00	15:19:00	Duke	267	Petal Fall	498	0	12	POINT (-122.85708764078088 45.050843985613156)	Joshr	82 degrees, sunny, no wind, no clouds
Eden	18	2019-05-10	15:08:00	15:19:00	Duke	267	Petal Fall	498	0	2	POINT (-122.85710248882872 45.050689056310723)	Joshr	82 degrees, sunny, no wind, no clouds
Eden	19	2019-05-10	15:08:00	15:19:00	Duke	267	Petal Fall	498	0	8	POINT (-122.85707547039044 45.051812302907059)	Joshr	82 degrees, sunny, no wind, no clouds
Eden	20	2019-05-10	15:08:00	15:19:00	Duke	267	Petal Fall	498	0	8	POINT (-122.85708899999999 45.050515098657343)	Joshr	82 degrees, sunny, no wind, no clouds
Eden	21	2019-05-10	15:08:00	15:19:00	Duke	267	Petal Fall	498	0	10	POINT (-122.85813666312343 45.050292711645277)	Joshr	82 degrees, sunny, no wind, no clouds
Eden	22	2019-05-10	15:08:00	15:19:00	Duke	267	Petal Fall	498	0	6	POINT (-122.85814692234258 45.051685910255074)	Joshr	82 degrees, sunny, no wind, no clouds
Eden	23	2019-05-10	15:08:00	15:19:00	Duke	267	Petal Fall	498	0	4	POINT (-122.85816084078087 45.051451372767275)	Joshr	82 degrees, sunny, no wind, no clouds
Eden	24	2019-05-10	15:08:00	15:19:00	Duke	267	Petal Fall	498	0	7	POINT (-122.85816487039042 45.051229321593993)	Joshr	82 degrees, sunny, no wind, no clouds
Eden	25	2019-05-10	15:08:00	15:19:00	Duke	267	Petal Fall	498	0	6	POINT (-122.85817292960957 45.051027197340609)	Joshr	82 degrees, sunny, no wind, no clouds
Eden	26	2019-05-10	15:08:00	15:19:00	Duke	267	Petal Fall	498	0	0	POINT (-122.85816487039042 45.050802297683852)	Joshr	82 degrees, sunny, no wind, no clouds
Eden	27	2019-05-10	15:08:00	15:19:00	Duke	267	Petal Fall	498	9	0	POINT (-122.85813666312343 45.050523307007268)	Joshr	82 degrees, sunny, no wind, no clouds
Eden	28	2019-05-10	15:08:00	15:19:00	Duke	267	Petal Fall	498	0	3	POINT (-122.85813263351388 45.050062115353569)	Joshr	82 degrees, sunny, no wind, no clouds
Eden	29	2019-05-10	15:08:00	15:19:00	Duke	267	Petal Fall	498	0	7	POINT (-122.85814472234257 45.049877068274313)	Joshr	82 degrees, sunny, no wind, no clouds
Eden	30	2019-05-10	15:08:00	15:19:00	Duke	267	Petal Fall	498	0	7	POINT (-122.85815866312343 45.051843835161172)	Joshr	82 degrees, sunny, no wind, no clouds
Angel Valley	1	2019-05-10	09:37:00	10:23:00	Duke	547	Full Bloom	495	0	0	POINT (-122.7093847742947 44.706916596754027)	Joshr	pollinator study 70 degrees
Angel Valley	2	2019-05-10	09:37:00	10:23:00	Duke	547	Full Bloom	495	0	0	POINT (-122.70924007874061 44.706527360332672)	Joshr	pollinator study 70 degrees
Angel Valley	3	2019-05-10	09:37:00	10:23:00	Duke	547	Full Bloom	495	0	0	POINT (-122.7091272496726 44.706255287156651)	Joshr	pollinator study 70 degrees
Angel Valley	4	2019-05-10	09:37:00	10:23:00	Duke	547	Full Bloom	495	0	3	POINT (-122.70900636138549 44.70593166160846)	Joshr	pollinator study 70 degrees
Angel Valley	5	2019-05-10	09:37:00	10:23:00	Duke	547	Full Bloom	495	0	2	POINT (-122.70882502895478 44.705482019569281)	Joshr	pollinator study 70 degrees
Angel Valley	6	2019-05-10	09:37:00	10:23:00	Duke	547	Full Bloom	495	0	1	POINT (-122.7086154892571 44.704909222104227)	Joshr	pollinator study 70 degrees
Angel Valley	7	2019-05-10	09:37:00	10:23:00	Duke	547	Full Bloom	495	0	0	POINT (-122.70850266018908 44.704622821246289)	Joshr	pollinator study 70 degrees
Angel Valley	8	2019-05-10	09:37:00	10:23:00	Duke	547	Full Bloom	495	0	0	POINT (-122.70873637754423 44.705221397425426)	Joshr	pollinator study 70 degrees
Angel Valley	9	2019-05-10	09:37:00	10:23:00	Duke	547	Full Bloom	495	0	4	POINT (-122.70836162385412 44.704316370759074)	Joshr	pollinator study 70 degrees
Angel Valley	10	2019-05-10	09:37:00	10:23:00	Duke	547	Full Bloom	495	0	2	POINT (-122.70823267634783 44.704007054603622)	Joshr	pollinator study 70 degrees
Angel Valley	11	2019-05-10	09:37:00	10:23:00	Duke	547	Full Bloom	495	0	0	POINT (-122.70909310522319 44.70481005245572)	Joshr	pollinator study 70 degrees
Angel Valley	12	2019-05-10	09:37:00	10:23:00	Duke	547	Full Bloom	495	0	1	POINT (-122.70912073988823 44.7049180782589)	Joshr	pollinator study 70 degrees
Angel Valley	13	2019-05-10	09:37:00	10:23:00	Duke	547	Full Bloom	495	0	0	POINT (-122.70912764855449 44.704991732100005)	Joshr	pollinator study 70 degrees
Angel Valley	14	2019-05-10	09:37:00	10:23:00	Duke	547	Full Bloom	495	0	2	POINT (-122.7091760092183 44.705089937075748)	Joshr	pollinator study 70 degrees
Angel Valley	15	2019-05-10	09:37:00	10:23:00	Duke	547	Full Bloom	495	0	3	POINT (-122.70922436988211 44.705178321411424)	Joshr	pollinator study 70 degrees
Angel Valley	16	2019-05-10	09:37:00	10:23:00	Duke	547	Full Bloom	495	0	0	POINT (-122.70930727387719 44.7054876655237)	Joshr	pollinator study 70 degrees
Angel Valley	17	2019-05-10	09:37:00	10:23:00	Duke	547	Full Bloom	495	0	0	POINT (-122.70941090387103 44.705738085737153)	Joshr	pollinator study 70 degrees
Angel Valley	18	2019-05-10	09:37:00	10:23:00	Duke	547	Full Bloom	495	9	0	POINT (-122.70958362052751 44.70599832520324)	Joshr	pollinator study 70 degrees
Angel Valley	19	2019-05-10	09:37:00	10:23:00	Duke	547	Full Bloom	495	0	6	POINT (-122.70969415918762 44.706297844650038)	Joshr	pollinator study 70 degrees
Angel Valley	20	2019-05-10	09:37:00	10:23:00	Duke	547	Full Bloom	495	0	2	POINT (-122.70982542384651 44.70667101425154)	Joshr	pollinator study 70 degrees
Angel Valley	21	2019-05-10	09:37:00	10:23:00	Duke	547	Full Bloom	495	0	2	POINT (-122.71053910390427 44.706722890988942)	Joshr	pollinator study 70 degrees
Angel Valley	22	2019-05-10	09:37:00	10:23:00	Duke	547	Full Bloom	495	0	6	POINT (-122.71051089663727 44.7066283818236)	Joshr	pollinator study 70 degrees
Angel Valley	23	2019-05-10	09:37:00	10:23:00	Duke	547	Full Bloom	495	0	5	POINT (-122.71046657093201 44.706525280739946)	Joshr	pollinator study 70 degrees
Angel Valley	24	2019-05-10	09:37:00	10:23:00	Duke	547	Full Bloom	495	0	0	POINT (-122.710438363665 44.706427907325676)	Joshr	pollinator study 70 degrees
Angel Valley	25	2019-05-10	09:37:00	10:23:00	Duke	547	Full Bloom	495	0	0	POINT (-122.71040209717887 44.70633912554046)	Joshr	pollinator study 70 degrees
Angel Valley	26	2019-05-10	09:37:00	10:23:00	Duke	547	Full Bloom	495	0	0	POINT (-122.71039000835016 44.706250343619111)	Joshr	pollinator study 70 degrees
Angel Valley	27	2019-05-10	09:37:00	10:23:00	Duke	547	Full Bloom	495	0	6	POINT (-122.71035777147358 44.70619879276358)	Joshr	pollinator study 70 degrees
Angel Valley	28	2019-05-10	09:37:00	10:23:00	Duke	547	Full Bloom	495	0	3	POINT (-122.71031747537788 44.706147241862126)	Joshr	pollinator study 70 degrees
Angel Valley	29	2019-05-10	09:37:00	10:23:00	Duke	547	Full Bloom	495	0	0	POINT (-122.71030538654917 44.706121466394194)	Joshr	pollinator study 70 degrees
Angel Valley	30	2019-05-10	09:37:00	10:23:00	Duke	547	Full Bloom	495	0	1	POINT (-122.71028926811086 44.706064187535482)	Joshr	pollinator study 70 degrees
LM	1	2019-05-10	13:49:00	14:25:00	Duke	838	Petal Fall	497	0	2	POINT (-122.85673366142069 44.984275103358776)	Joshr	76 degrees pollinator study
LM	2	2019-05-10	13:49:00	14:25:00	Duke	838	Petal Fall	497	0	5	POINT (-122.85674071718306 44.984494686985343)	Joshr	76 degrees pollinator study
LM	3	2019-05-10	13:49:00	14:25:00	Duke	838	Petal Fall	497	0	4	POINT (-122.85676188447022 44.984684326713214)	Joshr	76 degrees pollinator study
LM	4	2019-05-10	13:49:00	14:25:00	Duke	838	Petal Fall	497	0	6	POINT (-122.85673366142069 44.984844022839582)	Joshr	76 degrees pollinator study
LM	5	2019-05-10	13:49:00	14:25:00	Duke	838	Petal Fall	497	0	0	POINT (-122.8567266056583 44.985038651892111)	Joshr	76 degrees pollinator study
LM	6	2019-05-10	13:49:00	14:25:00	Duke	838	Petal Fall	497	0	0	POINT (-122.85673366142069 44.985263223054716)	Joshr	76 degrees pollinator study
LM	7	2019-05-10	13:49:00	14:25:00	Duke	838	Petal Fall	497	0	0	POINT (-122.85671954989591 44.9854927837783)	Joshr	76 degrees pollinator study
LM	8	2019-05-10	13:49:00	14:25:00	Duke	838	Petal Fall	497	0	7	POINT (-122.85671249413353 44.985662458504869)	Joshr	76 degrees pollinator study
LM	9	2019-05-10	13:49:00	14:25:00	Duke	838	Petal Fall	497	0	4	POINT (-122.85673366142069 44.985842113550326)	Joshr	76 degrees pollinator study
LM	10	2019-05-10	13:49:00	14:25:00	Duke	838	Petal Fall	497	11	4	POINT (-122.85673366142069 44.985951902467576)	Joshr	76 degrees pollinator study
LM	11	2019-05-10	13:49:00	14:25:00	Duke	838	Petal Fall	497	0	3	POINT (-122.85695964078084 44.98593939769264)	Joshr	76 degrees pollinator study
LM	12	2019-05-10	13:49:00	14:25:00	Duke	838	Petal Fall	497	0	0	POINT (-122.85698514804788 44.985652040568695)	Joshr	76 degrees pollinator study
LM	13	2019-05-10	13:49:00	14:25:00	Duke	838	Petal Fall	497	0	12	POINT (-122.85695897039041 44.985467185222973)	Joshr	76 degrees pollinator study
LM	14	2019-05-10	13:49:00	14:25:00	Duke	838	Petal Fall	497	0	7	POINT (-122.85696935921914 44.985280079193053)	Joshr	76 degrees pollinator study
LM	15	2019-05-10	13:49:00	14:25:00	Duke	838	Petal Fall	497	0	5	POINT (-122.85697878882873 44.985817144836126)	Joshr	76 degrees pollinator study
LM	16	2019-05-10	13:49:00	14:25:00	Duke	838	Petal Fall	497	0	1	POINT (-122.85697994804788 44.985141624328534)	Joshr	76 degrees pollinator study
LM	17	2019-05-10	13:49:00	14:25:00	Duke	838	Petal Fall	497	0	3	POINT (-122.85696262960958 44.984997068902075)	Joshr	76 degrees pollinator study
LM	19	2019-05-10	13:49:00	14:25:00	Duke	838	Petal Fall	497	0	4	POINT (-122.85697341843832 44.984735858181153)	Joshr	76 degrees pollinator study
LM	20	2019-05-10	13:49:00	14:25:00	Duke	838	Petal Fall	497	0	4	POINT (-122.85692869273299 44.98455099988103)	Joshr	76 degrees pollinator study
LM	21	2019-05-10	13:49:00	14:25:00	Duke	838	Petal Fall	497	0	2	POINT (-122.85730597375314 44.984318212597159)	Joshr	76 degrees pollinator study
LM	22	2019-05-10	13:49:00	14:25:00	Duke	838	Petal Fall	497	0	3	POINT (-122.85730194414356 44.984514872196804)	Joshr	76 degrees pollinator study
LM	23	2019-05-10	13:49:00	14:25:00	Duke	838	Petal Fall	497	0	5	POINT (-122.85731413297228 44.984759683220716)	Joshr	76 degrees pollinator study
LM	24	2019-05-10	13:49:00	14:25:00	Duke	838	Petal Fall	497	0	0	POINT (-122.85729801453398 44.985013343523342)	Joshr	76 degrees pollinator study
LM	25	2019-05-10	13:49:00	14:25:00	Duke	838	Petal Fall	497	0	2	POINT (-122.85729398492442 44.985218551036716)	Joshr	76 degrees pollinator study
LM	26	2019-05-10	13:49:00	14:25:00	Duke	838	Petal Fall	497	0	1	POINT (-122.85729801453398 44.985409507368537)	Joshr	76 degrees pollinator study
LM	27	2019-05-10	13:49:00	14:25:00	Duke	838	Petal Fall	497	0	0	POINT (-122.85729398492442 44.985594762903425)	Joshr	76 degrees pollinator study
LM	28	2019-05-10	13:49:00	14:25:00	Duke	838	Petal Fall	497	0	5	POINT (-122.85729801453398 44.985757217264393)	Joshr	76 degrees pollinator study
LM	29	2019-05-10	13:49:00	14:25:00	Duke	838	Petal Fall	497	0	5	POINT (-122.85731413297228 44.985911120971188)	Joshr	76 degrees pollinator study
LM	30	2019-05-10	13:49:00	14:25:00	Duke	838	Petal Fall	497	0	6	POINT (-122.85728592570524 44.986039373744553)	Joshr	76 degrees pollinator study
LM	18	2019-05-10	13:49:00	14:25:00	Duke	838	Petal Fall	497		2	POINT (-122.85695377039042 44.984877964158329)	Joshr	76 degrees pollinator study
Five Oaks	1	2019-05-10	12:04:00	12:43:00	Duke	983	Full Bloom	496	0	4	POINT (-122.91219490944138 45.023050665813116)	Joshr	75 degrees pollinator study. slight wind, no clouds, full sun
Five Oaks	2	2019-05-10	12:04:00	12:43:00	Duke	983	Full Bloom	496	0	8	POINT (-122.91223172642054 45.02325884991447)	Joshr	75 degrees pollinator study. slight wind, no clouds, full sun
Five Oaks	3	2019-05-10	12:04:00	12:43:00	Duke	983	Full Bloom	496	0	3	POINT (-122.91218018264969 45.0226290906892)	Joshr	75 degrees pollinator study. slight wind, no clouds, full sun
Five Oaks	4	2019-05-10	12:04:00	12:43:00	Duke	983	Full Bloom	496	0	11	POINT (-122.91224645321222 45.023716852272614)	Joshr	75 degrees pollinator study. slight wind, no clouds, full sun
Five Oaks	5	2019-05-10	12:04:00	12:43:00	Duke	983	Full Bloom	496	0	4	POINT (-122.91217281925387 45.023904215817595)	Joshr	75 degrees pollinator study. slight wind, no clouds, full sun
Five Oaks	6	2019-05-10	12:04:00	12:43:00	Duke	983	Full Bloom	496	0	2	POINT (-122.91220963623306 45.024284145568025)	Joshr	75 degrees pollinator study. slight wind, no clouds, full sun
Five Oaks	7	2019-05-10	12:04:00	12:43:00	Duke	983	Full Bloom	496	0	3	POINT (-122.91220227283721 45.022832071691944)	Joshr	75 degrees pollinator study. slight wind, no clouds, full sun
Five Oaks	8	2019-05-10	12:04:00	12:43:00	Duke	983	Full Bloom	496	0	0	POINT (-122.91217281925387 45.02415403292369)	Joshr	75 degrees pollinator study. slight wind, no clouds, full sun
Five Oaks	9	2019-05-10	12:04:00	12:43:00	Duke	983	Full Bloom	496	0	3	POINT (-122.91228327019142 45.024497529664536)	Joshr	75 degrees pollinator study. slight wind, no clouds, full sun
Five Oaks	10	2019-05-10	12:04:00	12:43:00	Duke	983	Full Bloom	496	0	6	POINT (-122.91221699962887 45.023508669836779)	Joshr	75 degrees pollinator study. slight wind, no clouds, full sun
Five Oaks	11	2019-05-10	12:04:00	12:43:00	Duke	983	Full Bloom	496	0	4	POINT (-122.91134937765744 45.02418734386184)	Joshr	75 degrees pollinator study. slight wind, no clouds, full sun
Five Oaks	12	2019-05-10	12:04:00	12:43:00	Duke	983	Full Bloom	496	0	0	POINT (-122.91132327039041 45.023975479540923)	Joshr	75 degrees pollinator study. slight wind, no clouds, full sun
Five Oaks	13	2019-05-10	12:04:00	12:43:00	Duke	983	Full Bloom	496	0	2	POINT (-122.911329 45.023740428968942)	Joshr	75 degrees pollinator study. slight wind, no clouds, full sun
Five Oaks	14	2019-05-10	12:04:00	12:43:00	Duke	983	Full Bloom	496	0	4	POINT (-122.91133815921914 45.023505677436638)	Joshr	75 degrees pollinator study. slight wind, no clouds, full sun
Five Oaks	15	2019-05-10	12:04:00	12:43:00	Duke	983	Full Bloom	496	0	0	POINT (-122.911359107267 45.023282517771477)	Joshr	75 degrees pollinator study. slight wind, no clouds, full sun
Five Oaks	16	2019-05-10	12:04:00	12:43:00	Duke	983	Full Bloom	496	0	13	POINT (-122.91134751843828 45.023073898327965)	Joshr	75 degrees pollinator study. slight wind, no clouds, full sun
Five Oaks	17	2019-05-10	12:04:00	12:43:00	Duke	983	Full Bloom	496	0	2	POINT (-122.91136030726702 45.022856733442872)	Joshr	75 degrees pollinator study. slight wind, no clouds, full sun
Five Oaks	18	2019-05-10	12:04:00	12:43:00	Duke	983	Full Bloom	496	0	0	POINT (-122.91136836648614 45.022395318753873)	Joshr	75 degrees pollinator study. slight wind, no clouds, full sun
Five Oaks	19	2019-05-10	12:04:00	12:43:00	Duke	983	Full Bloom	496	0	9	POINT (-122.91139254414357 45.022230119998191)	Joshr	75 degrees pollinator study. slight wind, no clouds, full sun
Five Oaks	20	2019-05-10	12:04:00	12:43:00	Duke	983	Full Bloom	496	0	0	POINT (-122.91134821843832 45.0226146336068)	Joshr	75 degrees pollinator study. slight wind, no clouds, full sun
Five Oaks	21	2019-05-10	12:04:00	12:43:00	Duke	983	Full Bloom	496	0	5	POINT (-122.91049270000003 45.022709649258559)	Joshr	75 degrees pollinator study. slight wind, no clouds, full sun
Five Oaks	22	2019-05-10	12:04:00	12:43:00	Duke	983	Full Bloom	496	0	10	POINT (-122.91054921453399 45.023462829967421)	Joshr	75 degrees pollinator study. slight wind, no clouds, full sun
Five Oaks	23	2019-05-10	12:04:00	12:43:00	Duke	983	Full Bloom	496	0	4	POINT (-122.91049682960956 45.023750497160812)	Joshr	75 degrees pollinator study. slight wind, no clouds, full sun
Five Oaks	24	2019-05-10	12:04:00	12:43:00	Duke	983	Full Bloom	496	0	5	POINT (-122.91047255195215 45.022142847755319)	Joshr	75 degrees pollinator study. slight wind, no clouds, full sun
Five Oaks	25	2019-05-10	12:04:00	12:43:00	Duke	983	Full Bloom	496	0	0	POINT (-122.91049270000003 45.02252736195009)	Joshr	75 degrees pollinator study. slight wind, no clouds, full sun
Five Oaks	26	2019-05-10	12:04:00	12:43:00	Duke	983	Full Bloom	496	0	2	POINT (-122.91050488882871 45.024117911572993)	Joshr	75 degrees pollinator study. slight wind, no clouds, full sun
Five Oaks	27	2019-05-10	12:04:00	12:43:00	Duke	983	Full Bloom	496	0	8	POINT (-122.91052906648615 45.024382790267836)	Joshr	75 degrees pollinator study. slight wind, no clouds, full sun
Five Oaks	28	2019-05-10	12:04:00	12:43:00	Duke	983	Full Bloom	496	0	0	POINT (-122.91050075921918 45.022367860079051)	Joshr	75 degrees pollinator study. slight wind, no clouds, full sun
Five Oaks	29	2019-05-10	12:04:00	12:43:00	Duke	983	Full Bloom	496	0	1	POINT (-122.91049682960956 45.022924518167784)	Joshr	75 degrees pollinator study. slight wind, no clouds, full sun
Five Oaks	30	2019-05-10	12:04:00	12:43:00	Duke	983	Full Bloom	496	0	5	POINT (-122.91050085921911 45.023206491646484)	Joshr	75 degrees pollinator study. slight wind, no clouds, full sun
Verboort	1	2019-05-10	08:24:00	10:56:00	Liberty	1011	Full Bloom	492	0	2	POINT (-123.07867714893752 45.547718865452339)	angiem	sunny, 79 degrees , 2mph wind, start 1220
Verboort	2	2019-05-10	08:24:00	10:56:00	Liberty	1011	Full Bloom	492	0	6	POINT (-123.07892623114019 45.547718865452339)	angiem	sunny, 79 degrees , 2mph wind, start 1220
Verboort	3	2019-05-10	08:24:00	10:56:00	Liberty	1011	Full Bloom	492	0	4	POINT (-123.07915498010186 45.547736665041384)	angiem	sunny, 79 degrees , 2mph wind, start 1220
Verboort	4	2019-05-10	08:24:00	10:56:00	Liberty	1011	Full Bloom	492	0	2	POINT (-123.07962264464568 45.547743784875422)	angiem	sunny, 79 degrees , 2mph wind, start 1220
Verboort	5	2019-05-10	08:24:00	10:56:00	Liberty	1011	Full Bloom	492	0	0	POINT (-123.080090672437 45.547736980069374)	angiem	sunny, 79 degrees , 2mph wind, start 1220
Verboort	6	2019-05-10	08:24:00	10:56:00	Liberty	1011	Full Bloom	492	0	1	POINT (-123.08056347059241 45.547757674286096)	angiem	sunny, 79 degrees , 2mph wind, start 1220
Verboort	7	2019-05-10	08:24:00	10:56:00	Liberty	1011	Full Bloom	492	0	3	POINT (-123.08096978150721 45.54776284783911)	angiem	sunny, 79 degrees , 2mph wind, start 1220
Verboort	8	2019-05-10	08:24:00	10:56:00	Liberty	1011	Full Bloom	492	0	1	POINT (-123.08136532589576 45.547771553791115)	angiem	sunny, 79 degrees , 2mph wind, start 1220
Verboort	9	2019-05-10	08:24:00	10:56:00	Liberty	1011	Full Bloom	492	0	0	POINT (-123.0815926107245 45.5477680166616)	angiem	sunny, 79 degrees , 2mph wind, start 1220
Verboort	10	2019-05-10	08:24:00	10:56:00	Liberty	1011	Full Bloom	492	0	0	POINT (-123.08187545406687 45.547785702306967)	angiem	sunny, 79 degrees , 2mph wind, start 1220
Verboort	11	2019-05-10	08:24:00	10:56:00	Liberty	1011	Full Bloom	492	0	3	POINT (-123.07868841569099 45.547877667573132)	angiem	sunny, 79 degrees , 2mph wind, start 1220
Verboort	12	2019-05-10	08:24:00	10:56:00	Liberty	1011	Full Bloom	492	0	1	POINT (-123.07897125903339 45.547895353183968)	angiem	sunny, 79 degrees , 2mph wind, start 1220
Verboort	13	2019-05-10	08:24:00	10:56:00	Liberty	1011	Full Bloom	492	0	0	POINT (-123.07929955934154 45.547891816062268)	angiem	sunny, 79 degrees , 2mph wind, start 1220
Verboort	14	2019-05-10	08:24:00	10:56:00	Liberty	1011	Full Bloom	492	0	2	POINT (-123.07963291042365 45.547895353183968)	angiem	sunny, 79 degrees , 2mph wind, start 1220
Verboort	15	2019-05-10	08:24:00	10:56:00	Liberty	1011	Full Bloom	492	0	1	POINT (-123.08013832251318 45.547905558039467)	angiem	sunny, 79 degrees , 2mph wind, start 1220
Verboort	16	2019-05-10	08:24:00	10:56:00	Liberty	1011	Full Bloom	492	0	0	POINT (-123.08061276057406 45.547909501668656)	angiem	sunny, 79 degrees , 2mph wind, start 1220
Verboort	17	2019-05-10	08:24:00	10:56:00	Liberty	1011	Full Bloom	492	0	0	POINT (-123.08092085778634 45.547898890305468)	angiem	sunny, 79 degrees , 2mph wind, start 1220
Verboort	18	2019-05-10	08:24:00	10:56:00	Liberty	1011	Full Bloom	492	0	3	POINT (-123.081329970478 45.547905964547837)	angiem	sunny, 79 degrees , 2mph wind, start 1220
Verboort	19	2019-05-10	08:24:00	10:56:00	Liberty	1011	Full Bloom	492	0	1	POINT (-123.08156230608068 45.547913038789268)	angiem	sunny, 79 degrees , 2mph wind, start 1220
Verboort	20	2019-05-10	08:24:00	10:56:00	Liberty	1011	Full Bloom	492	0	2	POINT (-123.08184878845495 45.547907536138482)	angiem	sunny, 79 degrees , 2mph wind, start 1220
Verboort	21	2019-05-10	08:24:00	10:56:00	Liberty	1011	Full Bloom	492	0	0	POINT (-123.07873233244914 45.54801089201456)	angiem	sunny, 79 degrees , 2mph wind, start 1220
Verboort	22	2019-05-10	08:24:00	10:56:00	Liberty	1011	Full Bloom	492	0	1	POINT (-123.07898974896943 45.548013295637361)	angiem	sunny, 79 degrees , 2mph wind, start 1220
Verboort	23	2019-05-10	08:24:00	10:56:00	Liberty	1011	Full Bloom	492	0	2	POINT (-123.07929364484677 45.548023709803687)	angiem	sunny, 79 degrees , 2mph wind, start 1220
Verboort	24	2019-05-10	08:24:00	10:56:00	Liberty	1011	Full Bloom	492	0	0	POINT (-123.07968451697516 45.548003955935435)	angiem	sunny, 79 degrees , 2mph wind, start 1220
Verboort	25	2019-05-10	08:24:00	10:56:00	Liberty	1011	Full Bloom	492	0	4	POINT (-123.08010603274141 45.548033697864533)	angiem	sunny, 79 degrees , 2mph wind, start 1220
Verboort	26	2019-05-10	08:24:00	10:56:00	Liberty	1011	Full Bloom	492	0	6	POINT (-123.08057095822714 45.548036030894927)	angiem	sunny, 79 degrees , 2mph wind, start 1220
Verboort	27	2019-05-10	08:24:00	10:56:00	Liberty	1011	Full Bloom	492	0	1	POINT (-123.08092942192177 45.548041235492221)	angiem	sunny, 79 degrees , 2mph wind, start 1220
Verboort	28	2019-05-10	08:24:00	10:56:00	Liberty	1011	Full Bloom	492	0	0	POINT (-123.08127922778272 45.548033697864533)	angiem	sunny, 79 degrees , 2mph wind, start 1220
Verboort	29	2019-05-10	08:24:00	10:56:00	Liberty	1011	Full Bloom	492	0	1	POINT (-123.08155369084284 45.548048773118886)	angiem	sunny, 79 degrees , 2mph wind, start 1220
Verboort	30	2019-05-10	08:24:00	10:56:00	Liberty	1011	Full Bloom	492	0	0	POINT (-123.08180124575979 45.54799977852749)	angiem	sunny, 79 degrees , 2mph wind, start 1220
Verboort	1	2019-05-10	08:24:00	11:01:00	Duke	1012	Petal Fall	493	0	2	POINT (-123.07874465981294 45.547260486687023)	angiem	76 degrees, 3mph winds, start time 1107
Verboort	2	2019-05-10	08:24:00	11:01:00	Duke	1012	Petal Fall	493	0	3	POINT (-123.07894460846339 45.547284999999995)	angiem	76 degrees, 3mph winds, start time 1107
Verboort	3	2019-05-10	08:24:00	11:01:00	Duke	1012	Petal Fall	493	0	2	POINT (-123.07949689997831 45.547296275814148)	angiem	76 degrees, 3mph winds, start time 1107
Verboort	4	2019-05-10	08:24:00	11:01:00	Duke	1012	Petal Fall	493	0	6	POINT (-123.07996241613529 45.547275106304063)	angiem	76 degrees, 3mph winds, start time 1107
Verboort	5	2019-05-10	08:24:00	11:01:00	Duke	1012	Petal Fall	493	0	1	POINT (-123.08022753336098 45.547277143551113)	angiem	76 degrees, 3mph winds, start time 1107
Verboort	6	2019-05-10	08:24:00	11:01:00	Duke	1012	Petal Fall	493	0	0	POINT (-123.08078554456621 45.547294008506206)	angiem	76 degrees, 3mph winds, start time 1107
Verboort	7	2019-05-10	08:24:00	11:01:00	Duke	1012	Petal Fall	493	0	4	POINT (-123.08140030148371 45.547281589464312)	angiem	76 degrees, 3mph winds, start time 1107
Verboort	8	2019-05-10	08:24:00	11:01:00	Duke	1012	Petal Fall	493	0	5	POINT (-123.08176088006032 45.547294008506206)	angiem	76 degrees, 3mph winds, start time 1107
Verboort	9	2019-05-10	08:24:00	11:01:00	Duke	1012	Petal Fall	493	0	0	POINT (-123.08196185828334 45.547277449783067)	angiem	76 degrees, 3mph winds, start time 1107
Verboort	10	2019-05-10	08:24:00	11:01:00	Duke	1012	Petal Fall	493	0	7	POINT (-123.08210963638854 45.547298148186236)	angiem	76 degrees, 3mph winds, start time 1107
Verboort	11	2019-05-10	08:24:00	11:01:00	Duke	1012	Petal Fall	493	0	2	POINT (-123.07875211783914 45.547451316132822)	angiem	76 degrees, 3mph winds, start time 1107
Verboort	12	2019-05-10	08:24:00	11:01:00	Duke	1012	Petal Fall	493	0	3	POINT (-123.0789944739316 45.547447176464068)	angiem	76 degrees, 3mph winds, start time 1107
Verboort	13	2019-05-10	08:24:00	11:01:00	Duke	1012	Petal Fall	493	0	0	POINT (-123.07945421104718 45.547457421499509)	angiem	76 degrees, 3mph winds, start time 1107
Verboort	14	2019-05-10	08:24:00	11:01:00	Duke	1012	Petal Fall	493	0	0	POINT (-123.07986240258909 45.547439165270113)	angiem	76 degrees, 3mph winds, start time 1107
Verboort	15	2019-05-10	08:24:00	11:01:00	Duke	1012	Petal Fall	493	0	2	POINT (-123.08023978433458 45.547423037032274)	angiem	76 degrees, 3mph winds, start time 1107
Verboort	16	2019-05-10	08:24:00	11:01:00	Duke	1012	Petal Fall	493	0	0	POINT (-123.0807884360749 45.54741584246451)	angiem	76 degrees, 3mph winds, start time 1107
Verboort	17	2019-05-10	08:24:00	11:01:00	Duke	1012	Petal Fall	493	0	3	POINT (-123.08138884790098 45.547421486486627)	angiem	76 degrees, 3mph winds, start time 1107
Verboort	18	2019-05-10	08:24:00	11:01:00	Duke	1012	Petal Fall	493	0	0	POINT (-123.08177084264946 45.54744086821583)	angiem	76 degrees, 3mph winds, start time 1107
Verboort	19	2019-05-10	08:24:00	11:01:00	Duke	1012	Petal Fall	493	0	3	POINT (-123.08002281025637 45.547432774529163)	angiem	76 degrees, 3mph winds, start time 1107
Verboort	20	2019-05-10	08:24:00	11:01:00	Duke	1012	Petal Fall	493	0	2	POINT (-123.08207591315735 45.547437971836764)	angiem	76 degrees, 3mph winds, start time 1107
Verboort	21	2019-05-10	08:24:00	11:01:00	Duke	1012	Petal Fall	493	0	1	POINT (-123.07873667479622 45.547564983286115)	angiem	76 degrees, 3mph winds, start time 1107
Verboort	22	2019-05-10	08:24:00	11:01:00	Duke	1012	Petal Fall	493	0	2	POINT (-123.0790302637773 45.547564983286115)	angiem	76 degrees, 3mph winds, start time 1107
Verboort	23	2019-05-10	08:24:00	11:01:00	Duke	1012	Petal Fall	493	0	1	POINT (-123.07944580510436 45.547593451708828)	angiem	76 degrees, 3mph winds, start time 1107
Verboort	24	2019-05-10	08:24:00	11:01:00	Duke	1012	Petal Fall	493	0	0	POINT (-123.07983215819557 45.547564254064696)	angiem	76 degrees, 3mph winds, start time 1107
Verboort	25	2019-05-10	08:24:00	11:01:00	Duke	1012	Petal Fall	493	1	0	POINT (-123.08028140451202 45.547549167489507)	angiem	76 degrees, 3mph winds, start time 1107
Verboort	26	2019-05-10	08:24:00	11:01:00	Duke	1012	Petal Fall	493	0	0	POINT (-123.08076261354124 45.547557971388983)	angiem	76 degrees, 3mph winds, start time 1107
Verboort	27	2019-05-10	08:24:00	11:01:00	Duke	1012	Petal Fall	493	5	1	POINT (-123.08131632527569 45.547557971388983)	angiem	76 degrees, 3mph winds, start time 1107
Verboort	28	2019-05-10	08:24:00	11:01:00	Duke	1012	Petal Fall	493	0	2	POINT (-123.08172607195918 45.54759287101453)	angiem	76 degrees, 3mph winds, start time 1107
Verboort	29	2019-05-10	08:24:00	11:01:00	Duke	1012	Petal Fall	493	0	2	POINT (-123.08189218547953 45.547608381952273)	angiem	76 degrees, 3mph winds, start time 1107
Verboort	30	2019-05-10	08:24:00	11:01:00	Duke	1012	Petal Fall	493	0	1	POINT (-123.08210813305598 45.547635526082985)	angiem	76 degrees, 3mph winds, start time 1107
Eden	1	2019-05-10	16:08:00	16:13:00	Liberty	1032	Petal Fall	499	0	14	POINT (-122.85583358882874 45.055115395384874)	Joshr	79 degrees, pollinator study, sunny, no wind, no clouds
Eden	2	2019-05-10	16:08:00	16:13:00	Liberty	1032	Petal Fall	499	0	17	POINT (-122.85582552960959 45.055024303408217)	Joshr	79 degrees, pollinator study, sunny, no wind, no clouds
Eden	3	2019-05-10	16:08:00	16:13:00	Liberty	1032	Petal Fall	499	0	21	POINT (-122.85584164804789 45.05492751802403)	Joshr	79 degrees, pollinator study, sunny, no wind, no clouds
Eden	4	2019-05-10	16:08:00	16:13:00	Liberty	1032	Petal Fall	499	0	13	POINT (-122.85584164804789 45.054790879555711)	Joshr	79 degrees, pollinator study, sunny, no wind, no clouds
Eden	5	2019-05-10	16:08:00	16:13:00	Liberty	1032	Petal Fall	499	0	12	POINT (-122.85584164804789 45.054620081011215)	Joshr	79 degrees, pollinator study, sunny, no wind, no clouds
Eden	6	2019-05-10	16:08:00	16:13:00	Liberty	1032	Petal Fall	499	9	11	POINT (-122.85582552960959 45.0544521286117)	Joshr	79 degrees, pollinator study, sunny, no wind, no clouds
Eden	7	2019-05-10	16:08:00	16:13:00	Liberty	1032	Petal Fall	499	0	17	POINT (-122.85581747039045 45.054289869045384)	Joshr	79 degrees, pollinator study, sunny, no wind, no clouds
Eden	8	2019-05-10	16:08:00	16:13:00	Liberty	1032	Petal Fall	499	0	18	POINT (-122.8558215 45.054138995702232)	Joshr	79 degrees, pollinator study, sunny, no wind, no clouds
Eden	9	2019-05-10	16:08:00	16:13:00	Liberty	1032	Petal Fall	499	0	14	POINT (-122.85582552960959 45.053985275282862)	Joshr	79 degrees, pollinator study, sunny, no wind, no clouds
Eden	10	2019-05-10	16:08:00	16:13:00	Liberty	1032	Petal Fall	499	0	20	POINT (-122.8558376184383 45.05380024089672)	Joshr	79 degrees, pollinator study, sunny, no wind, no clouds
Eden	11	2019-05-10	16:08:00	16:13:00	Liberty	1032	Petal Fall	499	0	16	POINT (-122.85639911117129 45.055103175060374)	Joshr	79 degrees, pollinator study, sunny, no wind, no clouds
Eden	12	2019-05-10	16:08:00	16:13:00	Liberty	1032	Petal Fall	499	0	14	POINT (-122.85640184078083 45.054986563414566)	Joshr	79 degrees, pollinator study, sunny, no wind, no clouds
Eden	13	2019-05-10	16:08:00	16:13:00	Liberty	1032	Petal Fall	499	0	13	POINT (-122.8564047703904 45.054852171718757)	Joshr	79 degrees, pollinator study, sunny, no wind, no clouds
Eden	14	2019-05-10	16:08:00	16:13:00	Liberty	1032	Petal Fall	499	0	7	POINT (-122.8564076703904 45.054696299814822)	Joshr	79 degrees, pollinator study, sunny, no wind, no clouds
Eden	15	2019-05-10	16:08:00	16:13:00	Liberty	1032	Petal Fall	499	0	15	POINT (-122.85642864804784 45.054505074418692)	Joshr	79 degrees, pollinator study, sunny, no wind, no clouds
Eden	16	2019-05-10	16:08:00	16:13:00	Liberty	1032	Petal Fall	499	0	19	POINT (-122.8564052 45.054356848300188)	Joshr	79 degrees, pollinator study, sunny, no wind, no clouds
Eden	17	2019-05-10	16:08:00	16:13:00	Liberty	1032	Petal Fall	499	0	23	POINT (-122.85639837039044 45.054162775099641)	Joshr	79 degrees, pollinator study, sunny, no wind, no clouds
Eden	18	2019-05-10	16:08:00	16:13:00	Liberty	1032	Petal Fall	499	0	16	POINT (-122.85638991117129 45.054018394791342)	Joshr	79 degrees, pollinator study, sunny, no wind, no clouds
Eden	19	2019-05-10	16:08:00	16:13:00	Liberty	1032	Petal Fall	499	0	15	POINT (-122.85638951117127 45.053830013814476)	Joshr	79 degrees, pollinator study, sunny, no wind, no clouds
Eden	20	2019-05-10	16:08:00	16:13:00	Liberty	1032	Petal Fall	499	0	22	POINT (-122.85639334078085 45.053692772708011)	Joshr	79 degrees, pollinator study, sunny, no wind, no clouds
Eden	21	2019-05-10	16:08:00	16:13:00	Liberty	1032	Petal Fall	499	8	10	POINT (-122.8575221184383 45.055127987892106)	Joshr	79 degrees, pollinator study, sunny, no wind, no clouds
Eden	22	2019-05-10	16:08:00	16:13:00	Liberty	1032	Petal Fall	499	0	15	POINT (-122.85750807039044 45.055002183030211)	Joshr	79 degrees, pollinator study, sunny, no wind, no clouds
Eden	23	2019-05-10	16:08:00	16:13:00	Liberty	1032	Petal Fall	499	0	17	POINT (-122.85751602960961 45.054868491375274)	Joshr	79 degrees, pollinator study, sunny, no wind, no clouds
Eden	24	2019-05-10	16:08:00	16:13:00	Liberty	1032	Petal Fall	499	0	13	POINT (-122.85753184804788 45.054757172527744)	Joshr	79 degrees, pollinator study, sunny, no wind, no clouds
Eden	25	2019-05-10	16:08:00	16:13:00	Liberty	1032	Petal Fall	499	0	16	POINT (-122.85750657039043 45.05463242024279)	Joshr	79 degrees, pollinator study, sunny, no wind, no clouds
Eden	26	2019-05-10	16:08:00	16:13:00	Liberty	1032	Petal Fall	499	0	12	POINT (-122.85751523687657 45.054478447764488)	Joshr	79 degrees, pollinator study, sunny, no wind, no clouds
Eden	27	2019-05-10	16:08:00	16:13:00	Liberty	1032	Petal Fall	499	0	15	POINT (-122.85752416648613 45.054286575011716)	Joshr	79 degrees, pollinator study, sunny, no wind, no clouds
Eden	28	2019-05-10	16:08:00	16:13:00	Liberty	1032	Petal Fall	499	0	18	POINT (-122.85752343687655 45.054091554936527)	Joshr	79 degrees, pollinator study, sunny, no wind, no clouds
Eden	29	2019-05-10	16:08:00	16:13:00	Liberty	1032	Petal Fall	499	0	21	POINT (-122.85751021843828 45.053885247466759)	Joshr	79 degrees, pollinator study, sunny, no wind, no clouds
Eden	30	2019-05-10	16:08:00	16:13:00	Liberty	1032	Petal Fall	499	0	16	POINT (-122.85751251843828 45.053710252872811)	Joshr	79 degrees, pollinator study, sunny, no wind, no clouds
Angel Valley	1	2019-05-09	09:28:00	09:37:00	Duke	547	Petal Fall	464	0	5	POINT (-122.70942779663727 44.706855821531704)	Joshr	pollinator study 66 degrees
Angel Valley	2	2019-05-09	09:28:00	09:37:00	Duke	547	Petal Fall	464	0	0	POINT (-122.70922621615877 44.706317704856168)	Joshr	pollinator study 66 degrees
Angel Valley	3	2019-05-09	09:28:00	09:37:00	Duke	547	Petal Fall	464	0	0	POINT (-122.7093471044459 44.706612689081041)	Joshr	pollinator study 66 degrees
Angel Valley	4	2019-05-09	09:28:00	09:37:00	Duke	547	Petal Fall	464	3	1	POINT (-122.70911741670032 44.7060570864747)	Joshr	pollinator study 66 degrees
Angel Valley	5	2019-05-09	09:28:00	09:37:00	Duke	547	Petal Fall	464	13	4	POINT (-122.70901264685149 44.705773555254567)	Joshr	pollinator study 66 degrees
Angel Valley	6	2019-05-09	09:28:00	09:37:00	Duke	547	Petal Fall	464	0	2	POINT (-122.70835207971048 44.703954873925007)	Joshr	pollinator study 66 degrees
Angel Valley	7	2019-05-09	09:28:00	09:37:00	Duke	547	Petal Fall	464	0	0	POINT (-122.70881951442074 44.705215041641324)	Joshr	pollinator study 66 degrees
Angel Valley	8	2019-05-09	09:28:00	09:37:00	Duke	547	Petal Fall	464	0	0	POINT (-122.70871071496235 44.704942962297295)	Joshr	pollinator study 66 degrees
Angel Valley	9	2019-05-09	09:28:00	09:37:00	Duke	547	Petal Fall	464	0	2	POINT (-122.70858982667518 44.704576369158886)	Joshr	pollinator study 66 degrees
Angel Valley	10	2019-05-09	09:28:00	09:37:00	Duke	547	Petal Fall	464	0	0	POINT (-122.70847296799764 44.704281374557134)	Joshr	pollinator study 66 degrees
Angel Valley	11	2019-05-09	09:28:00	09:37:00	Duke	547	Petal Fall	464	0	0	POINT (-122.70902833613738 44.704752684914567)	Joshr	pollinator study 66 degrees
Angel Valley	12	2019-05-09	09:28:00	09:37:00	Duke	547	Petal Fall	464	0	0	POINT (-122.70913048233113 44.704954926027362)	Joshr	pollinator study 66 degrees
Angel Valley	13	2019-05-09	09:28:00	09:37:00	Duke	547	Petal Fall	464	0	7	POINT (-122.70919614774139 44.705151980791008)	Joshr	pollinator study 66 degrees
Angel Valley	14	2019-05-09	09:28:00	09:37:00	Duke	547	Petal Fall	464	0	2	POINT (-122.70931288624853 44.705426819209535)	Joshr	pollinator study 66 degrees
Angel Valley	15	2019-05-09	09:28:00	09:37:00	Duke	547	Petal Fall	464	0	4	POINT (-122.70942962475569 44.7057016563232)	Joshr	pollinator study 66 degrees
Angel Valley	16	2019-05-09	09:28:00	09:37:00	Duke	547	Petal Fall	464	0	5	POINT (-122.7095828440463 44.705960935422986)	Joshr	pollinator study 66 degrees
Angel Valley	17	2019-05-09	09:28:00	09:37:00	Duke	547	Petal Fall	464	0	0	POINT (-122.70968499024005 44.706225398908352)	Joshr	pollinator study 66 degrees
Angel Valley	18	2019-05-09	09:28:00	09:37:00	Duke	547	Petal Fall	464	0	0	POINT (-122.709757951807 44.706469119089761)	Joshr	pollinator study 66 degrees
Angel Valley	19	2019-05-09	09:28:00	09:37:00	Duke	547	Petal Fall	464	0	3	POINT (-122.70984550568738 44.706666168698973)	Joshr	pollinator study 66 degrees
Angel Valley	20	2019-05-09	09:28:00	09:37:00	Duke	547	Petal Fall	464	0	2	POINT (-122.70991117109763 44.7067698787502)	Joshr	pollinator study 66 degrees
Angel Valley	21	2019-05-09	09:28:00	09:37:00	Duke	547	Petal Fall	464	0	0	POINT (-122.7105624 44.70665324128781)	Joshr	pollinator study 66 degrees
Angel Valley	22	2019-05-09	09:28:00	09:37:00	Duke	547	Petal Fall	464	0	0	POINT (-122.71050348546598 44.706566623766186)	Joshr	pollinator study 66 degrees
Angel Valley	23	2019-05-09	09:28:00	09:37:00	Duke	547	Petal Fall	464	0	0	POINT (-122.71050551507557 44.706480306116092)	Joshr	pollinator study 66 degrees
Angel Valley	24	2019-05-09	09:28:00	09:37:00	Duke	547	Petal Fall	464	0	0	POINT (-122.71046704858944 44.706379968696957)	Joshr	pollinator study 66 degrees
Angel Valley	25	2019-05-09	09:28:00	09:37:00	Duke	547	Petal Fall	464	0	3	POINT (-122.7104041044459 44.706288422905757)	Joshr	pollinator study 66 degrees
Angel Valley	26	2019-05-09	09:28:00	09:37:00	Duke	547	Petal Fall	464	6	0	POINT (-122.71041216366504 44.706202504844214)	Joshr	pollinator study 66 degrees
Angel Valley	27	2019-05-09	09:28:00	09:37:00	Duke	547	Petal Fall	464	0	0	POINT (-122.71039517483629 44.706156381823106)	Joshr	pollinator study 66 degrees
Angel Valley	28	2019-05-09	09:28:00	09:37:00	Duke	547	Petal Fall	464	9	0	POINT (-122.71036919717889 44.706127342414163)	Joshr	pollinator study 66 degrees
Angel Valley	29	2019-05-09	09:28:00	09:37:00	Duke	547	Petal Fall	464	0	3	POINT (-122.71033163069275 44.706089811163089)	Joshr	pollinator study 66 degrees
Angel Valley	30	2019-05-09	09:28:00	09:37:00	Duke	547	Petal Fall	464	0	0	POINT (-122.71031461225445 44.706026604378621)	Joshr	pollinator study 66 degrees
Casale	1	2019-05-09	15:52:00	16:36:00	Liberty	1149	Full Bloom	481	1	7	POINT (-122.78318720678959 45.281179090027621)	cinziab	less windy but still breezy
Casale	2	2019-05-09	15:52:00	16:36:00	Liberty	1149	Full Bloom	481	0	3	POINT (-122.78313981650173 45.281073798220348)	cinziab	less windy but still breezy
Casale	3	2019-05-09	15:52:00	16:36:00	Liberty	1149	Full Bloom	481	0	0	POINT (-122.78312763506305 45.28091466127804)	cinziab	less windy but still breezy
Casale	4	2019-05-09	15:52:00	16:36:00	Liberty	1149	Full Bloom	481	0	1	POINT (-122.78315181272046 45.280744539425683)	cinziab	less windy but still breezy
Casale	5	2019-05-09	15:52:00	16:36:00	Liberty	1149	Full Bloom	481	0	8	POINT (-122.78316793115879 45.280611276951738)	cinziab	less windy but still breezy
Casale	6	2019-05-09	15:52:00	16:36:00	Liberty	1149	Full Bloom	481	0	10	POINT (-122.78314375350135 45.28042697726984)	cinziab	less windy but still breezy
Casale	7	2019-05-09	15:52:00	16:36:00	Liberty	1149	Full Bloom	481	0	11	POINT (-122.78313569428221 45.280268195525387)	cinziab	less windy but still breezy
Casale	8	2019-05-09	15:52:00	16:36:00	Liberty	1149	Full Bloom	481	0	11	POINT (-122.78319210881619 45.280171792106607)	cinziab	less windy but still breezy
Casale	9	2019-05-09	15:52:00	16:36:00	Liberty	1149	Full Bloom	481	0	14	POINT (-122.7831759903779 45.279978984777635)	cinziab	less windy but still breezy
Casale	10	2019-05-09	15:52:00	16:36:00	Liberty	1149	Full Bloom	481	0	15	POINT (-122.78314194995519 45.2798813229969)	cinziab	less windy but still breezy
Casale	11	2019-05-09	15:52:00	16:36:00	Liberty	1149	Full Bloom	481	0	13	POINT (-122.78224515056698 45.280010174242918)	cinziab	less windy but still breezy
Casale	12	2019-05-09	15:52:00	16:36:00	Liberty	1149	Full Bloom	481	0	12	POINT (-122.78224515056698 45.279913770385733)	cinziab	less windy but still breezy
Casale	13	2019-05-09	15:52:00	16:36:00	Liberty	1149	Full Bloom	481	0	4	POINT (-122.78221694329999 45.280228500019852)	cinziab	less windy but still breezy
Casale	14	2019-05-09	15:52:00	16:36:00	Liberty	1149	Full Bloom	481	0	5	POINT (-122.78223709134782 45.280336244898855)	cinziab	less windy but still breezy
Casale	15	2019-05-09	15:52:00	16:36:00	Liberty	1149	Full Bloom	481	0	6	POINT (-122.78220888408083 45.280421306500912)	cinziab	less windy but still breezy
Casale	16	2019-05-09	15:52:00	16:36:00	Liberty	1149	Full Bloom	481	0	13	POINT (-122.78212426227986 45.281220879326831)	cinziab	less windy but still breezy
Casale	17	2019-05-09	15:52:00	16:36:00	Liberty	1149	Full Bloom	481	0	4	POINT (-122.78216455837556 45.280721856473512)	cinziab	less windy but still breezy
Casale	18	2019-05-09	15:52:00	16:36:00	Liberty	1149	Full Bloom	481	0	10	POINT (-122.78224918017654 45.280835271143737)	cinziab	less windy but still breezy
Casale	19	2019-05-09	15:52:00	16:36:00	Liberty	1149	Full Bloom	481	0	8	POINT (-122.78212829188942 45.280948685587305)	cinziab	less windy but still breezy
Casale	21	2019-05-09	15:52:00	16:36:00	Liberty	1149	Full Bloom	481	0	7	POINT (-122.78185427843859 45.27999032640335)	cinziab	less windy but still breezy
Casale	22	2019-05-09	15:52:00	16:36:00	Liberty	1149	Full Bloom	481	0	6	POINT (-122.78179383429502 45.279910934975682)	cinziab	less windy but still breezy
Casale	23	2019-05-09	15:52:00	16:36:00	Liberty	1149	Full Bloom	481	0	3	POINT (-122.78180189351416 45.280222829231057)	cinziab	less windy but still breezy
Casale	24	2019-05-09	15:52:00	16:36:00	Liberty	1149	Full Bloom	481	0	2	POINT (-122.78176159741842 45.28039295264773)	cinziab	less windy but still breezy
Casale	25	2019-05-09	15:52:00	16:36:00	Liberty	1149	Full Bloom	481	0	2	POINT (-122.78176159741842 45.280554569421078)	cinziab	less windy but still breezy
Casale	26	2019-05-09	15:52:00	16:36:00	Liberty	1149	Full Bloom	481	0	4	POINT (-122.78175756780887 45.280727527212413)	cinziab	less windy but still breezy
Casale	27	2019-05-09	15:52:00	16:36:00	Liberty	1149	Full Bloom	481	0	9	POINT (-122.7817253309323 45.280877801586691)	cinziab	less windy but still breezy
Casale	28	2019-05-09	15:52:00	16:36:00	Liberty	1149	Full Bloom	481	0	3	POINT (-122.78171727171315 45.28099972201295)	cinziab	less windy but still breezy
Casale	29	2019-05-09	15:52:00	16:36:00	Liberty	1149	Full Bloom	481	0	10	POINT (-122.78168503483657 45.281124477526774)	cinziab	less windy but still breezy
Casale	30	2019-05-09	15:52:00	16:36:00	Liberty	1149	Full Bloom	481	0	4	POINT (-122.78161653147387 45.281271915507624)	cinziab	less windy but still breezy
Casale	1	2019-05-09	14:15:00	15:12:00	Duke	1193	Petal Fall	480	0	1	POINT (-122.79067425641153 45.275808411049489)	cinziab	18 mph winds on avg, not many blossoms left
Casale	2	2019-05-09	14:15:00	15:12:00	Duke	1193	Petal Fall	480	0	1	POINT (-122.79069745669055 45.2757121864603)	cinziab	18 mph winds on avg, not many blossoms left
Casale	3	2019-05-09	14:15:00	15:12:00	Duke	1193	Petal Fall	480	0	2	POINT (-122.79070551590972 45.2755930902982)	cinziab	18 mph winds on avg, not many blossoms left
Casale	4	2019-05-09	14:15:00	15:12:00	Duke	1193	Petal Fall	480	0	0	POINT (-122.79067594345652 45.27551587576437)	cinziab	18 mph winds on avg, not many blossoms left
Casale	5	2019-05-09	14:15:00	15:12:00	Duke	1193	Petal Fall	480	0	3	POINT (-122.79070551590972 45.275318033920939)	cinziab	18 mph winds on avg, not many blossoms left
Casale	6	2019-05-09	14:15:00	15:12:00	Duke	1193	Petal Fall	480	0	2	POINT (-122.79067327903316 45.275366239774108)	cinziab	18 mph winds on avg, not many blossoms left
Casale	7	2019-05-09	14:15:00	15:12:00	Duke	1193	Petal Fall	480	0	0	POINT (-122.79066924942356 45.275196101285978)	cinziab	18 mph winds on avg, not many blossoms left
Casale	8	2019-05-09	14:15:00	15:12:00	Duke	1193	Petal Fall	480	0	7	POINT (-122.79066924942356 45.275153566584244)	cinziab	18 mph winds on avg, not many blossoms left
Casale	9	2019-05-09	14:15:00	15:12:00	Duke	1193	Petal Fall	480	0	1	POINT (-122.79066924942356 45.275065661432919)	cinziab	18 mph winds on avg, not many blossoms left
Casale	10	2019-05-09	14:15:00	15:12:00	Duke	1193	Petal Fall	480	0	0	POINT (-122.79062089410874 45.27495223523)	cinziab	18 mph winds on avg, not many blossoms left
Casale	11	2019-05-09	14:15:00	15:12:00	Duke	1193	Petal Fall	480	0	6	POINT (-122.79089893716912 45.274801945162011)	cinziab	18 mph winds on avg, not many blossoms left
Casale	12	2019-05-09	14:15:00	15:12:00	Duke	1193	Petal Fall	480	0	3	POINT (-122.79094326287442 45.274926714303142)	cinziab	18 mph winds on avg, not many blossoms left
Casale	13	2019-05-09	14:15:00	15:12:00	Duke	1193	Petal Fall	480	0	3	POINT (-122.79093520365528 45.275008948359819)	cinziab	18 mph winds on avg, not many blossoms left
Casale	14	2019-05-09	14:15:00	15:12:00	Duke	1193	Petal Fall	480	0	1	POINT (-122.79095132209353 45.27513655269459)	cinziab	18 mph winds on avg, not many blossoms left
Casale	15	2019-05-09	14:15:00	15:12:00	Duke	1193	Petal Fall	480	0	2	POINT (-122.79097147014143 45.275196101285978)	cinziab	18 mph winds on avg, not many blossoms left
Casale	16	2019-05-09	14:15:00	15:12:00	Duke	1193	Petal Fall	480	0	0	POINT (-122.79094729248398 45.275295348799375)	cinziab	18 mph winds on avg, not many blossoms left
Casale	17	2019-05-09	14:15:00	15:12:00	Duke	1193	Petal Fall	480	0	0	POINT (-122.79097549975097 45.275391760503346)	cinziab	18 mph winds on avg, not many blossoms left
Casale	18	2019-05-09	14:15:00	15:12:00	Duke	1193	Petal Fall	480	0	2	POINT (-122.79099161818927 45.275488172043538)	cinziab	18 mph winds on avg, not many blossoms left
Casale	19	2019-05-09	14:15:00	15:12:00	Duke	1193	Petal Fall	480	0	2	POINT (-122.79101176623712 45.275632789046675)	cinziab	18 mph winds on avg, not many blossoms left
Casale	20	2019-05-09	14:15:00	15:12:00	Duke	1193	Petal Fall	480	0	1	POINT (-122.79100370701798 45.275780241297859)	cinziab	18 mph winds on avg, not many blossoms left
Casale	21	2019-05-09	14:15:00	15:12:00	Duke	1193	Petal Fall	480	0	2	POINT (-122.79114071374339 45.274739560488563)	cinziab	18 mph winds on avg, not many blossoms left
Casale	22	2019-05-09	14:15:00	15:12:00	Duke	1193	Petal Fall	480	0	2	POINT (-122.7920473758969 45.275167744821672)	cinziab	18 mph winds on avg, not many blossoms left
Casale	23	2019-05-09	14:15:00	15:12:00	Duke	1193	Petal Fall	480	0	1	POINT (-122.7912092171061 45.275025962287685)	cinziab	18 mph winds on avg, not many blossoms left
Casale	24	2019-05-09	14:15:00	15:12:00	Duke	1193	Petal Fall	480	0	3	POINT (-122.79123742437309 45.275164909174478)	cinziab	18 mph winds on avg, not many blossoms left
Casale	25	2019-05-09	14:15:00	15:12:00	Duke	1193	Petal Fall	480	0	0	POINT (-122.79118100983911 45.275329376478325)	cinziab	18 mph winds on avg, not many blossoms left
Casale	26	2019-05-09	14:15:00	15:12:00	Duke	1193	Petal Fall	480	0	1	POINT (-122.79119309866782 45.275377582321873)	cinziab	18 mph winds on avg, not many blossoms left
Casale	27	2019-05-09	14:15:00	15:12:00	Duke	1193	Petal Fall	480	0	1	POINT (-122.79118100983911 45.275508021457938)	cinziab	18 mph winds on avg, not many blossoms left
Casale	28	2019-05-09	14:15:00	15:12:00	Duke	1193	Petal Fall	480	0	1	POINT (-122.79120518749652 45.275663980900987)	cinziab	18 mph winds on avg, not many blossoms left
Casale	29	2019-05-09	14:15:00	15:12:00	Duke	1193	Petal Fall	480	0	0	POINT (-122.79118906905826 45.275715022080156)	cinziab	18 mph winds on avg, not many blossoms left
Casale	30	2019-05-09	14:15:00	15:12:00	Duke	1193	Petal Fall	480	0	4	POINT (-122.79118906905826 45.2758085974561)	cinziab	18 mph winds on avg, not many blossoms left
Casale	1	2019-05-08	12:38:00	15:09:00	Liberty	1149	Full Bloom	453	0	5	POINT (-122.78174742960955 45.279911535410157)	jeannettek	warm, sunny. 70 F, 8 mph wind. bloom full w significant petal fall, 50 to 70% bloom still white. started 220pm to 335pm.
Casale	2	2019-05-08	12:38:00	15:09:00	Liberty	1149	Full Bloom	453	0	4	POINT (-122.78175951843826 45.280002268460329)	jeannettek	warm, sunny. 70 F, 8 mph wind. bloom full w significant petal fall, 50 to 70% bloom still white. started 220pm to 335pm.
Casale	3	2019-05-08	12:38:00	15:09:00	Liberty	1149	Full Bloom	453	0	2	POINT (-122.78175951843826 45.280271631348256)	jeannettek	warm, sunny. 70 F, 8 mph wind. bloom full w significant petal fall, 50 to 70% bloom still white. started 220pm to 335pm.
Casale	4	2019-05-08	12:38:00	15:09:00	Liberty	1149	Full Bloom	453	0	6	POINT (-122.78171922234253 45.280458766917548)	jeannettek	warm, sunny. 70 F, 8 mph wind. bloom full w significant petal fall, 50 to 70% bloom still white. started 220pm to 335pm.
Casale	5	2019-05-08	12:38:00	15:09:00	Liberty	1149	Full Bloom	453	0	6	POINT (-122.78173131117126 45.280594865125721)	jeannettek	warm, sunny. 70 F, 8 mph wind. bloom full w significant petal fall, 50 to 70% bloom still white. started 220pm to 335pm.
Casale	6	2019-05-08	12:38:00	15:09:00	Liberty	1149	Full Bloom	453	0	3	POINT (-122.78173937039041 45.280756481323948)	jeannettek	warm, sunny. 70 F, 8 mph wind. bloom full w significant petal fall, 50 to 70% bloom still white. started 220pm to 335pm.
Casale	7	2019-05-08	12:38:00	15:09:00	Liberty	1149	Full Bloom	453	0	3	POINT (-122.78173131117127 45.280898249539852)	jeannettek	warm, sunny. 70 F, 8 mph wind. bloom full w significant petal fall, 50 to 70% bloom still white. started 220pm to 335pm.
Casale	8	2019-05-08	12:38:00	15:09:00	Liberty	1149	Full Bloom	453	0	3	POINT (-122.78172325195212 45.2810456881086)	jeannettek	warm, sunny. 70 F, 8 mph wind. bloom full w significant petal fall, 50 to 70% bloom still white. started 220pm to 335pm.
Casale	9	2019-05-08	12:38:00	15:09:00	Liberty	1149	Full Bloom	453	0	2	POINT (-122.78171116312338 45.281133583996159)	jeannettek	warm, sunny. 70 F, 8 mph wind. bloom full w significant petal fall, 50 to 70% bloom still white. started 220pm to 335pm.
Casale	10	2019-05-08	12:38:00	15:09:00	Liberty	1149	Full Bloom	453	0	2	POINT (-122.78169907429464 45.281261174558367)	jeannettek	warm, sunny. 70 F, 8 mph wind. bloom full w significant petal fall, 50 to 70% bloom still white. started 220pm to 335pm.
Casale	11	2019-05-08	12:38:00	15:09:00	Liberty	1149	Full Bloom	453	0	10	POINT (-122.78231768353926 45.281169843100137)	jeannettek	warm, sunny. 70 F, 8 mph wind. bloom full w significant petal fall, 50 to 70% bloom still white. started 220pm to 335pm.
Casale	12	2019-05-08	12:38:00	15:09:00	Liberty	1149	Full Bloom	453	0	3	POINT (-122.78230156510101 45.28106493515665)	jeannettek	warm, sunny. 70 F, 8 mph wind. bloom full w significant petal fall, 50 to 70% bloom still white. started 220pm to 335pm.
Casale	13	2019-05-08	12:38:00	15:09:00	Liberty	1149	Full Bloom	453	0	5	POINT (-122.78230559471056 45.280914661278061)	jeannettek	warm, sunny. 70 F, 8 mph wind. bloom full w significant petal fall, 50 to 70% bloom still white. started 220pm to 335pm.
Casale	14	2019-05-08	12:38:00	15:09:00	Liberty	1149	Full Bloom	453	0	4	POINT (-122.78228544666273 45.280721856473512)	jeannettek	warm, sunny. 70 F, 8 mph wind. bloom full w significant petal fall, 50 to 70% bloom still white. started 220pm to 335pm.
Casale	15	2019-05-08	12:38:00	15:09:00	Liberty	1149	Full Bloom	453	3	6	POINT (-122.78231365392973 45.280639630695838)	jeannettek	warm, sunny. 70 F, 8 mph wind. bloom full w significant petal fall, 50 to 70% bloom still white. started 220pm to 335pm.
Casale	16	2019-05-08	12:38:00	15:09:00	Liberty	1149	Full Bloom	453	0	0	POINT (-122.78227335783404 45.280580087816929)	jeannettek	warm, sunny. 70 F, 8 mph wind. bloom full w significant petal fall, 50 to 70% bloom still white. started 220pm to 335pm.
Casale	17	2019-05-08	12:38:00	15:09:00	Liberty	1149	Full Bloom	453	0	8	POINT (-122.7822935058819 45.28045816648892)	jeannettek	warm, sunny. 70 F, 8 mph wind. bloom full w significant petal fall, 50 to 70% bloom still white. started 220pm to 335pm.
Casale	18	2019-05-08	12:38:00	15:09:00	Liberty	1149	Full Bloom	453	0	8	POINT (-122.78230559471058 45.280231335414072)	jeannettek	warm, sunny. 70 F, 8 mph wind. bloom full w significant petal fall, 50 to 70% bloom still white. started 220pm to 335pm.
Casale	19	2019-05-08	12:38:00	15:09:00	Liberty	1149	Full Bloom	453	0	5	POINT (-122.78226932822447 45.279998832621224)	jeannettek	warm, sunny. 70 F, 8 mph wind. bloom full w significant petal fall, 50 to 70% bloom still white. started 220pm to 335pm.
Casale	20	2019-05-08	12:38:00	15:09:00	Liberty	1149	Full Bloom	453	0	3	POINT (-122.78230559471061 45.279922276615061)	jeannettek	warm, sunny. 70 F, 8 mph wind. bloom full w significant petal fall, 50 to 70% bloom still white. started 220pm to 335pm.
Casale	21	2019-05-08	12:38:00	15:09:00	Liberty	1149	Full Bloom	453	0	0	POINT (-122.78313569428221 45.279845720505612)	jeannettek	warm, sunny. 70 F, 8 mph wind. bloom full w significant petal fall, 50 to 70% bloom still white. started 220pm to 335pm.
Casale	22	2019-05-08	12:38:00	15:09:00	Liberty	1149	Full Bloom	453	0	11	POINT (-122.78314778311091 45.279984655590837)	jeannettek	warm, sunny. 70 F, 8 mph wind. bloom full w significant petal fall, 50 to 70% bloom still white. started 220pm to 335pm.
Casale	23	2019-05-08	12:38:00	15:09:00	Liberty	1149	Full Bloom	453	0	7	POINT (-122.78317599037791 45.280279537093364)	jeannettek	warm, sunny. 70 F, 8 mph wind. bloom full w significant petal fall, 50 to 70% bloom still white. started 220pm to 335pm.
Casale	24	2019-05-08	12:38:00	15:09:00	Liberty	1149	Full Bloom	453	0	6	POINT (-122.78314778311095 45.28040145880523)	jeannettek	warm, sunny. 70 F, 8 mph wind. bloom full w significant petal fall, 50 to 70% bloom still white. started 220pm to 335pm.
Casale	25	2019-05-08	12:38:00	15:09:00	Liberty	1149	Full Bloom	453	0	5	POINT (-122.78312763506307 45.280554569421149)	jeannettek	warm, sunny. 70 F, 8 mph wind. bloom full w significant petal fall, 50 to 70% bloom still white. started 220pm to 335pm.
Casale	26	2019-05-08	12:38:00	15:09:00	Liberty	1149	Full Bloom	453	0	7	POINT (-122.78313166467268 45.280721856473612)	jeannettek	warm, sunny. 70 F, 8 mph wind. bloom full w significant petal fall, 50 to 70% bloom still white. started 220pm to 335pm.
Casale	27	2019-05-08	12:38:00	15:09:00	Liberty	1149	Full Bloom	453	0	2	POINT (-122.78313569428227 45.2808721308629)	jeannettek	warm, sunny. 70 F, 8 mph wind. bloom full w significant petal fall, 50 to 70% bloom still white. started 220pm to 335pm.
Casale	28	2019-05-08	12:38:00	15:09:00	Liberty	1149	Full Bloom	453	0	2	POINT (-122.78312360545358 45.280977039162913)	jeannettek	warm, sunny. 70 F, 8 mph wind. bloom full w significant petal fall, 50 to 70% bloom still white. started 220pm to 335pm.
Casale	29	2019-05-08	12:38:00	15:09:00	Liberty	1149	Full Bloom	453	0	4	POINT (-122.78311957584403 45.281087617971806)	jeannettek	warm, sunny. 70 F, 8 mph wind. bloom full w significant petal fall, 50 to 70% bloom still white. started 220pm to 335pm.
Casale	30	2019-05-08	12:38:00	15:09:00	Liberty	1149	Full Bloom	453	0	2	POINT (-122.78313166467277 45.281175513794381)	jeannettek	warm, sunny. 70 F, 8 mph wind. bloom full w significant petal fall, 50 to 70% bloom still white. started 220pm to 335pm.
Casale	1	2019-05-08	11:06:00	13:28:00	Duke	1193	Petal Fall	452	0	1	POINT (-122.79216826418403 45.274594941209109)	jeannettek	full bloom to petal fall, actual white petals left on plant is 30 to 40%. 64F, wind 4 mph, sunny, few clouds. started 1240pm finish 150pm.
Casale	2	2019-05-08	11:06:00	13:28:00	Duke	1193	Petal Fall	452	0	1	POINT (-122.79214848713795 45.274654189908617)	jeannettek	full bloom to petal fall, actual white petals left on plant is 30 to 40%. 64F, wind 4 mph, sunny, few clouds. started 1240pm finish 150pm.
Casale	3	2019-05-08	11:06:00	13:28:00	Duke	1193	Petal Fall	452	0	0	POINT (-122.79215251674752 45.274753438369821)	jeannettek	full bloom to petal fall, actual white petals left on plant is 30 to 40%. 64F, wind 4 mph, sunny, few clouds. started 1240pm finish 150pm.
Casale	4	2019-05-08	11:06:00	13:28:00	Duke	1193	Petal Fall	452	0	4	POINT (-122.7921686351858 45.274861193645442)	jeannettek	full bloom to petal fall, actual white petals left on plant is 30 to 40%. 64F, wind 4 mph, sunny, few clouds. started 1240pm finish 150pm.
Casale	5	2019-05-08	11:06:00	13:28:00	Duke	1193	Petal Fall	452	0	3	POINT (-122.79213639830922 45.275141923534186)	jeannettek	full bloom to petal fall, actual white petals left on plant is 30 to 40%. 64F, wind 4 mph, sunny, few clouds. started 1240pm finish 150pm.
Casale	6	2019-05-08	11:06:00	13:28:00	Duke	1193	Petal Fall	452	0	2	POINT (-122.79211625026136 45.275286541419739)	jeannettek	full bloom to petal fall, actual white petals left on plant is 30 to 40%. 64F, wind 4 mph, sunny, few clouds. started 1240pm finish 150pm.
Casale	7	2019-05-08	11:06:00	13:28:00	Duke	1193	Petal Fall	452	0	1	POINT (-122.79211222065182 45.275382953138724)	jeannettek	full bloom to petal fall, actual white petals left on plant is 30 to 40%. 64F, wind 4 mph, sunny, few clouds. started 1240pm finish 150pm.
Casale	8	2019-05-08	11:06:00	13:28:00	Duke	1193	Petal Fall	452	0	0	POINT (-122.79215251674752 45.275521899151443)	jeannettek	full bloom to petal fall, actual white petals left on plant is 30 to 40%. 64F, wind 4 mph, sunny, few clouds. started 1240pm finish 150pm.
Casale	9	2019-05-08	11:06:00	13:28:00	Duke	1193	Petal Fall	452	0	1	POINT (-122.79215251674752 45.275655173578649)	jeannettek	full bloom to petal fall, actual white petals left on plant is 30 to 40%. 64F, wind 4 mph, sunny, few clouds. started 1240pm finish 150pm.
Casale	10	2019-05-08	11:06:00	13:28:00	Duke	1193	Petal Fall	452	0	0	POINT (-122.79216057596666 45.275745913435053)	jeannettek	full bloom to petal fall, actual white petals left on plant is 30 to 40%. 64F, wind 4 mph, sunny, few clouds. started 1240pm finish 150pm.
Casale	11	2019-05-08	11:06:00	13:28:00	Duke	1193	Petal Fall	452	0	0	POINT (-122.79165650376851 45.275729200177359)	jeannettek	full bloom to petal fall, actual white petals left on plant is 30 to 40%. 64F, wind 4 mph, sunny, few clouds. started 1240pm finish 150pm.
Casale	12	2019-05-08	11:06:00	13:28:00	Duke	1193	Petal Fall	452	0	1	POINT (-122.79167262220678 45.275658309656016)	jeannettek	full bloom to petal fall, actual white petals left on plant is 30 to 40%. 64F, wind 4 mph, sunny, few clouds. started 1240pm finish 150pm.
Casale	13	2019-05-08	11:06:00	13:28:00	Duke	1193	Petal Fall	452	0	0	POINT (-122.79167262220678 45.275556227149764)	jeannettek	full bloom to petal fall, actual white petals left on plant is 30 to 40%. 64F, wind 4 mph, sunny, few clouds. started 1240pm finish 150pm.
Casale	14	2019-05-08	11:06:00	13:28:00	Duke	1193	Petal Fall	452	0	4	POINT (-122.79167262220678 45.27540877431651)	jeannettek	full bloom to petal fall, actual white petals left on plant is 30 to 40%. 64F, wind 4 mph, sunny, few clouds. started 1240pm finish 150pm.
Casale	15	2019-05-08	11:06:00	13:28:00	Duke	1193	Petal Fall	452	0	3	POINT (-122.79167262220678 45.275284006235275)	jeannettek	full bloom to petal fall, actual white petals left on plant is 30 to 40%. 64F, wind 4 mph, sunny, few clouds. started 1240pm finish 150pm.
Casale	16	2019-05-08	11:06:00	13:28:00	Duke	1193	Petal Fall	452	0	1	POINT (-122.79166456298765 45.275111031850649)	jeannettek	full bloom to petal fall, actual white petals left on plant is 30 to 40%. 64F, wind 4 mph, sunny, few clouds. started 1240pm finish 150pm.
Casale	17	2019-05-08	11:06:00	13:28:00	Duke	1193	Petal Fall	452	0	2	POINT (-122.79168068142593 45.274833137473074)	jeannettek	full bloom to petal fall, actual white petals left on plant is 30 to 40%. 64F, wind 4 mph, sunny, few clouds. started 1240pm finish 150pm.
Casale	18	2019-05-08	11:06:00	13:28:00	Duke	1193	Petal Fall	452	0	3	POINT (-122.79166456298765 45.274674340074924)	jeannettek	full bloom to petal fall, actual white petals left on plant is 30 to 40%. 64F, wind 4 mph, sunny, few clouds. started 1240pm finish 150pm.
Casale	19	2019-05-08	11:06:00	13:28:00	Duke	1193	Petal Fall	452	0	6	POINT (-122.79166053337806 45.274589269857408)	jeannettek	full bloom to petal fall, actual white petals left on plant is 30 to 40%. 64F, wind 4 mph, sunny, few clouds. started 1240pm finish 150pm.
Casale	20	2019-05-08	11:06:00	13:28:00	Duke	1193	Petal Fall	452	0	4	POINT (-122.7916967998642 45.274419129039813)	jeannettek	full bloom to petal fall, actual white petals left on plant is 30 to 40%. 64F, wind 4 mph, sunny, few clouds. started 1240pm finish 150pm.
Casale	21	2019-05-08	11:06:00	13:28:00	Duke	1193	Petal Fall	452	0	2	POINT (-122.79127369085926 45.27453255630811)	jeannettek	full bloom to petal fall, actual white petals left on plant is 30 to 40%. 64F, wind 4 mph, sunny, few clouds. started 1240pm finish 150pm.
Casale	22	2019-05-08	11:06:00	13:28:00	Duke	1193	Petal Fall	452	0	2	POINT (-122.791257572421 45.274668668730975)	jeannettek	full bloom to petal fall, actual white petals left on plant is 30 to 40%. 64F, wind 4 mph, sunny, few clouds. started 1240pm finish 150pm.
Casale	23	2019-05-08	11:06:00	13:28:00	Duke	1193	Petal Fall	452	0	6	POINT (-122.79125354281143 45.274782095500669)	jeannettek	full bloom to petal fall, actual white petals left on plant is 30 to 40%. 64F, wind 4 mph, sunny, few clouds. started 1240pm finish 150pm.
Casale	24	2019-05-08	11:06:00	13:28:00	Duke	1193	Petal Fall	452	0	1	POINT (-122.79126966124973 45.274884179399528)	jeannettek	full bloom to petal fall, actual white petals left on plant is 30 to 40%. 64F, wind 4 mph, sunny, few clouds. started 1240pm finish 150pm.
Casale	25	2019-05-08	11:06:00	13:28:00	Duke	1193	Petal Fall	452	0	1	POINT (-122.79126160203059 45.275128045747934)	jeannettek	full bloom to petal fall, actual white petals left on plant is 30 to 40%. 64F, wind 4 mph, sunny, few clouds. started 1240pm finish 150pm.
Casale	26	2019-05-08	11:06:00	13:28:00	Duke	1193	Petal Fall	452	0	2	POINT (-122.79128175007844 45.275261321100118)	jeannettek	full bloom to petal fall, actual white petals left on plant is 30 to 40%. 64F, wind 4 mph, sunny, few clouds. started 1240pm finish 150pm.
Casale	27	2019-05-08	11:06:00	13:28:00	Duke	1193	Petal Fall	452	0	1	POINT (-122.79130189812628 45.275411609951568)	jeannettek	full bloom to petal fall, actual white petals left on plant is 30 to 40%. 64F, wind 4 mph, sunny, few clouds. started 1240pm finish 150pm.
Casale	28	2019-05-08	11:06:00	13:28:00	Duke	1193	Petal Fall	452	0	1	POINT (-122.79128980929758 45.275502350197478)	jeannettek	full bloom to petal fall, actual white petals left on plant is 30 to 40%. 64F, wind 4 mph, sunny, few clouds. started 1240pm finish 150pm.
Casale	29	2019-05-08	11:06:00	13:28:00	Duke	1193	Petal Fall	452	0	1	POINT (-122.79130592773579 45.275621446549948)	jeannettek	full bloom to petal fall, actual white petals left on plant is 30 to 40%. 64F, wind 4 mph, sunny, few clouds. started 1240pm finish 150pm.
Casale	30	2019-05-08	11:06:00	13:28:00	Duke	1193	Petal Fall	452	0	1	POINT (-122.79129383890707 45.275732035796359)	jeannettek	full bloom to petal fall, actual white petals left on plant is 30 to 40%. 64F, wind 4 mph, sunny, few clouds. started 1240pm finish 150pm.
LM	1	2019-05-07	10:54:00	11:32:00	Duke	838	Full Bloom	435	0	7	POINT (-122.85829917575296 44.984865229009863)	Joshr	66 degrees, sunny, no wind, no clouds, Duke
LM	2	2019-05-07	10:54:00	11:32:00	Duke	838	Full Bloom	435	0	3	POINT (-122.85667830767994 44.985943750869232)	Joshr	66 degrees, sunny, no wind, no clouds, Duke
LM	3	2019-05-07	10:54:00	11:32:00	Duke	838	Full Bloom	435	0	8	POINT (-122.85671242368295 44.985778865206008)	Joshr	66 degrees, sunny, no wind, no clouds, Duke
LM	4	2019-05-07	10:54:00	11:32:00	Duke	838	Full Bloom	435	0	7	POINT (-122.85668967968095 44.98561800068731)	Joshr	66 degrees, sunny, no wind, no clouds, Duke
LM	5	2019-05-07	10:54:00	11:32:00	Duke	838	Full Bloom	435	0	14	POINT (-122.85666124967845 44.985477243863109)	Joshr	66 degrees, sunny, no wind, no clouds, Duke
LM	6	2019-05-07	10:54:00	11:32:00	Duke	838	Full Bloom	435	0	9	POINT (-122.85669536568146 44.985296270295571)	Joshr	66 degrees, sunny, no wind, no clouds, Duke
LM	7	2019-05-07	10:54:00	11:32:00	Duke	838	Full Bloom	435	0	6	POINT (-122.85670105168195 44.985034863022761)	Joshr	66 degrees, sunny, no wind, no clouds, Duke
LM	8	2019-05-07	10:54:00	11:32:00	Duke	838	Full Bloom	435	1	12	POINT (-122.85668399368045 44.984853888058659)	Joshr	66 degrees, sunny, no wind, no clouds, Duke
LM	9	2019-05-07	10:54:00	11:32:00	Duke	838	Full Bloom	435	0	16	POINT (-122.85671242368295 44.984644760721906)	Joshr	66 degrees, sunny, no wind, no clouds, Duke
LM	10	2019-05-07	10:54:00	11:32:00	Duke	838	Full Bloom	435	0	19	POINT (-122.85668967968095 44.984512044900988)	Joshr	66 degrees, sunny, no wind, no clouds, Duke
LM	11	2019-05-07	10:54:00	11:32:00	Duke	838	Full Bloom	435	0	4	POINT (-122.85670105168195 44.984391393888068)	Joshr	66 degrees, sunny, no wind, no clouds, Duke
LM	12	2019-05-07	10:54:00	11:32:00	Duke	838	Full Bloom	435	0	11	POINT (-122.85700181679131 44.984200927276589)	Joshr	66 degrees, sunny, no wind, no clouds, Duke
LM	13	2019-05-07	10:54:00	11:32:00	Duke	838	Full Bloom	435	0	12	POINT (-122.85702618896677 44.984459503923446)	Joshr	66 degrees, sunny, no wind, no clouds, Duke
LM	14	2019-05-07	10:54:00	11:32:00	Duke	838	Full Bloom	435	0	7	POINT (-122.85703106340186 44.984652573725882)	Joshr	66 degrees, sunny, no wind, no clouds, Duke
LM	15	2019-05-07	10:54:00	11:32:00	Duke	838	Full Bloom	435	0	4	POINT (-122.85699694235626 44.984887014754683)	Joshr	66 degrees, sunny, no wind, no clouds, Duke
LM	16	2019-05-07	10:54:00	11:32:00	Duke	838	Full Bloom	435	0	8	POINT (-122.85696282131065 44.985052501962443)	Joshr	66 degrees, sunny, no wind, no clouds, Duke
LM	17	2019-05-07	10:54:00	11:32:00	Duke	838	Full Bloom	435	0	17	POINT (-122.85698719348608 44.985321417656188)	Joshr	66 degrees, sunny, no wind, no clouds, Duke
LM	18	2019-05-07	10:54:00	11:32:00	Duke	838	Full Bloom	435	0	6	POINT (-122.85698231905099 44.985490351228862)	Joshr	66 degrees, sunny, no wind, no clouds, Duke
LM	19	2019-05-07	10:54:00	11:32:00	Duke	838	Full Bloom	435	0	4	POINT (-122.85696769574572 44.985686865166642)	Joshr	66 degrees, sunny, no wind, no clouds, Duke
LM	20	2019-05-07	10:54:00	11:32:00	Duke	838	Full Bloom	435	0	3	POINT (-122.85697257018082 44.98591440677928)	Joshr	66 degrees, sunny, no wind, no clouds, Duke
LM	21	2019-05-07	10:54:00	11:32:00	Duke	838	Full Bloom	435	0	2	POINT (-122.85696282131065 44.984380207209057)	Joshr	66 degrees, sunny, no wind, no clouds, Duke
LM	22	2019-05-07	10:54:00	11:32:00	Duke	838	Full Bloom	435	0	13	POINT (-122.85731742695292 44.985885061869133)	Joshr	66 degrees, sunny, no wind, no clouds, Duke
LM	23	2019-05-07	10:54:00	11:32:00	Duke	838	Full Bloom	435	0	4	POINT (-122.85730533812421 44.985762508895249)	Joshr	66 degrees, sunny, no wind, no clouds, Duke
LM	24	2019-05-07	10:54:00	11:32:00	Duke	838	Full Bloom	435	0	5	POINT (-122.85733757500078 44.985637105580956)	Joshr	66 degrees, sunny, no wind, no clouds, Duke
LM	25	2019-05-07	10:54:00	11:32:00	Duke	838	Full Bloom	435	0	6	POINT (-122.85729727890507 44.9854974515672)	Joshr	66 degrees, sunny, no wind, no clouds, Duke
LM	26	2019-05-07	10:54:00	11:32:00	Duke	838	Full Bloom	435	0	8	POINT (-122.85731742695292 44.985295095147713)	Joshr	66 degrees, sunny, no wind, no clouds, Duke
LM	27	2019-05-07	10:54:00	11:32:00	Duke	838	Full Bloom	435	0	7	POINT (-122.85730936773379 44.985124089165865)	Joshr	66 degrees, sunny, no wind, no clouds, Duke
LM	28	2019-05-07	10:54:00	11:32:00	Duke	838	Full Bloom	435	0	18	POINT (-122.85732951578161 44.984910330971267)	Joshr	66 degrees, sunny, no wind, no clouds, Duke
LM	29	2019-05-07	10:54:00	11:32:00	Duke	838	Full Bloom	435	0	21	POINT (-122.85731742695292 44.984699422104676)	Joshr	66 degrees, sunny, no wind, no clouds, Duke
LM	30	2019-05-07	10:54:00	11:32:00	Duke	838	Full Bloom	435	0	14	POINT (-122.85732548617206 44.9845056132729)	Joshr	66 degrees, sunny, no wind, no clouds, Duke
Five Oaks	1	2019-05-07	12:12:00	13:48:00	Duke	983	Full Bloom	436	0	6	POINT (-122.91088838771051 45.023026108626979)	Joshr	73 degrees, sunny, light wind, no clouds
Five Oaks	2	2019-05-07	12:12:00	13:48:00	Duke	983	Full Bloom	436	0	4	POINT (-122.9121843304121 45.022593340981466)	Joshr	73 degrees, sunny, light wind, no clouds
Five Oaks	3	2019-05-07	12:12:00	13:48:00	Duke	983	Full Bloom	436	0	6	POINT (-122.91220030994164 45.022657344683118)	Joshr	73 degrees, sunny, light wind, no clouds
Five Oaks	4	2019-05-07	12:12:00	13:48:00	Duke	983	Full Bloom	436	0	2	POINT (-122.91217367739245 45.0228192360796)	Joshr	73 degrees, sunny, light wind, no clouds
Five Oaks	5	2019-05-07	12:12:00	13:48:00	Duke	983	Full Bloom	436	0	7	POINT (-122.91215769786294 45.023037600493836)	Joshr	73 degrees, sunny, light wind, no clouds
Five Oaks	6	2019-05-07	12:12:00	13:48:00	Duke	983	Full Bloom	436	0	8	POINT (-122.91220030994164 45.023259728957242)	Joshr	73 degrees, sunny, light wind, no clouds
Five Oaks	7	2019-05-07	12:12:00	13:48:00	Duke	983	Full Bloom	436	0	5	POINT (-122.91219498343177 45.0234705619558)	Joshr	73 degrees, sunny, light wind, no clouds
Five Oaks	8	2019-05-07	12:12:00	13:48:00	Duke	983	Full Bloom	436	0	3	POINT (-122.91218965692195 45.0237453966631)	Joshr	73 degrees, sunny, light wind, no clouds
Five Oaks	9	2019-05-07	12:12:00	13:48:00	Duke	983	Full Bloom	436	0	3	POINT (-122.91221628947113 45.023948698200336)	Joshr	73 degrees, sunny, light wind, no clouds
Five Oaks	10	2019-05-07	12:12:00	13:48:00	Duke	983	Full Bloom	436	0	4	POINT (-122.91220030994164 45.024189647235524)	Joshr	73 degrees, sunny, light wind, no clouds
Five Oaks	11	2019-05-07	12:12:00	13:48:00	Duke	983	Full Bloom	436	0	7	POINT (-122.91223759551046 45.024415536034937)	Joshr	73 degrees, sunny, light wind, no clouds
Five Oaks	12	2019-05-07	12:12:00	13:48:00	Duke	983	Full Bloom	436	0	4	POINT (-122.91129466687083 45.024284520994641)	Joshr	73 degrees, sunny, light wind, no clouds
Five Oaks	13	2019-05-07	12:12:00	13:48:00	Duke	983	Full Bloom	436	0	5	POINT (-122.91129466687083 45.024050971700888)	Joshr	73 degrees, sunny, light wind, no clouds
Five Oaks	14	2019-05-07	12:12:00	13:48:00	Duke	983	Full Bloom	436	0	6	POINT (-122.9112825780421 45.023626593106592)	Joshr	73 degrees, sunny, light wind, no clouds
Five Oaks	15	2019-05-07	12:12:00	13:48:00	Duke	983	Full Bloom	436	0	3	POINT (-122.91129063726125 45.02385729595413)	Joshr	73 degrees, sunny, light wind, no clouds
Five Oaks	17	2019-05-07	12:12:00	13:48:00	Duke	983	Full Bloom	436	0	8	POINT (-122.91125034116554 45.023190818524668)	Joshr	73 degrees, sunny, light wind, no clouds
Five Oaks	18	2019-05-07	12:12:00	13:48:00	Duke	983	Full Bloom	436	0	7	POINT (-122.91129063726125 45.024201924402078)	Joshr	73 degrees, sunny, light wind, no clouds
Five Oaks	19	2019-05-07	12:12:00	13:48:00	Duke	983	Full Bloom	436	0	10	POINT (-122.9112825780421 45.022988595206236)	Joshr	73 degrees, sunny, light wind, no clouds
Five Oaks	20	2019-05-07	12:12:00	13:48:00	Duke	983	Full Bloom	436	0	12	POINT (-122.9112382523368 45.022772130017479)	Joshr	73 degrees, sunny, light wind, no clouds
Five Oaks	21	2019-05-07	12:12:00	13:48:00	Duke	983	Full Bloom	436	0	10	POINT (-122.91124228194639 45.022504395625532)	Joshr	73 degrees, sunny, light wind, no clouds
Five Oaks	22	2019-05-07	12:12:00	13:48:00	Duke	983	Full Bloom	436	0	11	POINT (-122.91046834475476 45.0221579431937)	Joshr	73 degrees, sunny, light wind, no clouds
Five Oaks	23	2019-05-07	12:12:00	13:48:00	Duke	983	Full Bloom	436	0	7	POINT (-122.91045680643511 45.022406690533529)	Joshr	73 degrees, sunny, light wind, no clouds
Five Oaks	24	2019-05-07	12:12:00	13:48:00	Duke	983	Full Bloom	436	0	5	POINT (-122.91046257559493 45.022594269779916)	Joshr	73 degrees, sunny, light wind, no clouds
Five Oaks	25	2019-05-07	12:12:00	13:48:00	Duke	983	Full Bloom	436	0	2	POINT (-122.91045680643511 45.022814470719709)	Joshr	73 degrees, sunny, light wind, no clouds
Five Oaks	27	2019-05-07	12:12:00	13:48:00	Duke	983	Full Bloom	436	0	4	POINT (-122.91045680643511 45.023324191867964)	Joshr	73 degrees, sunny, light wind, no clouds
Five Oaks	28	2019-05-07	12:12:00	13:48:00	Duke	983	Full Bloom	436	0	4	POINT (-122.91052603635299 45.023572934140589)	Joshr	73 degrees, sunny, light wind, no clouds
Five Oaks	29	2019-05-07	12:12:00	13:48:00	Duke	983	Full Bloom	436	0	8	POINT (-122.91047411391455 45.023809442184344)	Joshr	73 degrees, sunny, light wind, no clouds
Five Oaks	30	2019-05-07	12:12:00	13:48:00	Duke	983	Full Bloom	436	0	7	POINT (-122.91045680643511 45.02405818234859)	Joshr	73 degrees, sunny, light wind, no clouds
Five Oaks	1	2019-05-07	12:12:00	12:38:00	Duke	984	Full Bloom	437	0	4	POINT (-122.89871961923771 45.010359030428091)	Joshr	69 degrees, sunny, nonclouds, light wind Pollinator survey
Five Oaks	2	2019-05-07	12:12:00	12:38:00	Duke	984	Full Bloom	437	0	12	POINT (-122.89926310415646 45.010288095756295)	Joshr	69 degrees, sunny, nonclouds, light wind Pollinator survey
Five Oaks	3	2019-05-07	12:12:00	12:38:00	Duke	984	Full Bloom	437	0	7	POINT (-122.89904847332596 45.010314002521945)	Joshr	69 degrees, sunny, nonclouds, light wind Pollinator survey
Five Oaks	4	2019-05-07	12:12:00	12:38:00	Duke	984	Full Bloom	437	0	5	POINT (-122.89887048678357 45.010291796723536)	Joshr	69 degrees, sunny, nonclouds, light wind Pollinator survey
Five Oaks	5	2019-05-07	12:12:00	12:38:00	Duke	984	Full Bloom	437	0	9	POINT (-122.89865062105474 45.010325105417948)	Joshr	69 degrees, sunny, nonclouds, light wind Pollinator survey
Five Oaks	6	2019-05-07	12:12:00	12:38:00	Duke	984	Full Bloom	437	0	6	POINT (-122.89845692981747 45.0103436102398)	Joshr	69 degrees, sunny, nonclouds, light wind Pollinator survey
Five Oaks	8	2019-05-07	12:12:00	12:38:00	Duke	984	Full Bloom	437	0	11	POINT (-122.89798055407165 45.010302899623831)	Joshr	69 degrees, sunny, nonclouds, light wind Pollinator survey
Five Oaks	9	2019-05-07	12:12:00	12:38:00	Duke	984	Full Bloom	437	1	3	POINT (-122.89775545344452 45.010365816018137)	Joshr	69 degrees, sunny, nonclouds, light wind Pollinator survey
Five Oaks	10	2019-05-07	12:12:00	12:38:00	Duke	984	Full Bloom	437	0	13	POINT (-122.89765599037672 45.010328806382795)	Joshr	69 degrees, sunny, nonclouds, light wind Pollinator survey
Five Oaks	11	2019-05-07	12:12:00	12:38:00	Duke	984	Full Bloom	437	1	7	POINT (-122.89756699710551 45.010325105417948)	Joshr	69 degrees, sunny, nonclouds, light wind Pollinator survey
Five Oaks	12	2019-05-07	12:12:00	12:38:00	Duke	984	Full Bloom	437	0	10	POINT (-122.89755157500001 45.009822897611137)	Joshr	69 degrees, sunny, nonclouds, light wind Pollinator survey
Five Oaks	13	2019-05-07	12:12:00	12:38:00	Duke	984	Full Bloom	437	0	8	POINT (-122.89774105665639 45.009845862313711)	Joshr	69 degrees, sunny, nonclouds, light wind Pollinator survey
Five Oaks	14	2019-05-07	12:12:00	12:38:00	Duke	984	Full Bloom	437	0	8	POINT (-122.8979467795976 45.0098764819028)	Joshr	69 degrees, sunny, nonclouds, light wind Pollinator survey
Five Oaks	15	2019-05-07	12:12:00	12:38:00	Duke	984	Full Bloom	437	0	14	POINT (-122.89818498510851 45.009845862313711)	Joshr	69 degrees, sunny, nonclouds, light wind Pollinator survey
Five Oaks	16	2019-05-07	12:12:00	12:38:00	Duke	984	Full Bloom	437	0	9	POINT (-122.8983203291488 45.009838207413864)	Joshr	69 degrees, sunny, nonclouds, light wind Pollinator survey
Five Oaks	17	2019-05-07	12:12:00	12:38:00	Duke	984	Full Bloom	437	0	7	POINT (-122.89848815575871 45.0098420348639)	Joshr	69 degrees, sunny, nonclouds, light wind Pollinator survey
Five Oaks	18	2019-05-07	12:12:00	12:38:00	Duke	984	Full Bloom	437	0	10	POINT (-122.8986343273222 45.0098420348639)	Joshr	69 degrees, sunny, nonclouds, light wind Pollinator survey
Five Oaks	19	2019-05-07	12:12:00	12:38:00	Duke	984	Full Bloom	437	0	13	POINT (-122.89876967136252 45.009830552513023)	Joshr	69 degrees, sunny, nonclouds, light wind Pollinator survey
Five Oaks	20	2019-05-07	12:12:00	12:38:00	Duke	984	Full Bloom	437	0	13	POINT (-122.89888336035634 45.009819070159828)	Joshr	69 degrees, sunny, nonclouds, light wind Pollinator survey
Five Oaks	21	2019-05-07	12:12:00	12:38:00	Duke	984	Full Bloom	437	0	5	POINT (-122.89894291173407 45.009807587804339)	Joshr	69 degrees, sunny, nonclouds, light wind Pollinator survey
Five Oaks	22	2019-05-07	12:12:00	12:38:00	Duke	984	Full Bloom	437	0	8	POINT (-122.89764940706173 45.009591072783216)	Joshr	69 degrees, sunny, nonclouds, light wind Pollinator survey
Five Oaks	23	2019-05-07	12:12:00	12:38:00	Duke	984	Full Bloom	437	0	10	POINT (-122.89773805847229 45.009608166104115)	Joshr	69 degrees, sunny, nonclouds, light wind Pollinator survey
Five Oaks	24	2019-05-07	12:12:00	12:38:00	Duke	984	Full Bloom	437	0	7	POINT (-122.89785894675943 45.009628108305371)	Joshr	69 degrees, sunny, nonclouds, light wind Pollinator survey
Five Oaks	25	2019-05-07	12:12:00	12:38:00	Duke	984	Full Bloom	437	0	6	POINT (-122.89799192387528 45.009619561648549)	Joshr	69 degrees, sunny, nonclouds, light wind Pollinator survey
Five Oaks	27	2019-05-07	12:12:00	12:38:00	Duke	984	Full Bloom	437	0	9	POINT (-122.89827399654524 45.009591072783216)	Joshr	69 degrees, sunny, nonclouds, light wind Pollinator survey
Five Oaks	28	2019-05-07	12:12:00	12:38:00	Duke	984	Full Bloom	437	0	4	POINT (-122.89837473678455 45.009602468331032)	Joshr	69 degrees, sunny, nonclouds, light wind Pollinator survey
Five Oaks	29	2019-05-07	12:12:00	12:38:00	Duke	984	Full Bloom	437	0	5	POINT (-122.89850368429082 45.009593921670387)	Joshr	69 degrees, sunny, nonclouds, light wind Pollinator survey
Five Oaks	30	2019-05-07	12:12:00	12:38:00	Duke	984	Full Bloom	437	0	6	POINT (-122.89860039492054 45.009585375008427)	Joshr	69 degrees, sunny, nonclouds, light wind Pollinator survey
Eden	1	2019-05-06	11:07:00	14:04:00	Duke	267	Full Bloom	409	0	11	POINT (-122.8572700637615 45.0507381845303)	Joshr	pollinator survey, sunny, no clouds, light wind. 81 degrees *****Bees swarming at hives*****
Eden	2	2019-05-06	11:07:00	14:04:00	Duke	267	Full Bloom	409	0	13	POINT (-122.85597363503626 45.051301125735293)	Joshr	pollinator survey, sunny, no clouds, light wind. 81 degrees *****Bees swarming at hives*****
Eden	3	2019-05-06	11:07:00	14:04:00	Duke	267	Full Bloom	409	0	17	POINT (-122.85596749969268 45.051331466925369)	Joshr	pollinator survey, sunny, no clouds, light wind. 81 degrees *****Bees swarming at hives*****
Eden	4	2019-05-06	11:07:00	14:04:00	Duke	267	Full Bloom	409	0	14	POINT (-122.85600431175415 45.051812589359443)	Joshr	pollinator survey, sunny, no clouds, light wind. 81 degrees *****Bees swarming at hives*****
Eden	5	2019-05-06	11:07:00	14:04:00	Duke	267	Full Bloom	409	1	10	POINT (-122.855992041067 45.05183426144589)	Joshr	pollinator survey, sunny, no clouds, light wind. 81 degrees *****Bees swarming at hives*****
Eden	6	2019-05-06	11:07:00	14:04:00	Duke	267	Full Bloom	409	0	22	POINT (-122.85597363503626 45.051682556668268)	Joshr	pollinator survey, sunny, no clouds, light wind. 81 degrees *****Bees swarming at hives*****
Eden	7	2019-05-06	11:07:00	14:04:00	Duke	267	Full Bloom	409	1	15	POINT (-122.855992041067 45.051613205778743)	Joshr	pollinator survey, sunny, no clouds, light wind. 81 degrees *****Bees swarming at hives*****
Eden	8	2019-05-06	11:07:00	14:04:00	Duke	267	Full Bloom	409	0	13	POINT (-122.85596136434913 45.051548189243469)	Joshr	pollinator survey, sunny, no clouds, light wind. 81 degrees *****Bees swarming at hives*****
Eden	9	2019-05-06	11:07:00	14:04:00	Duke	267	Full Bloom	409	0	8	POINT (-122.85596749969268 45.051483172634256)	Joshr	pollinator survey, sunny, no clouds, light wind. 81 degrees *****Bees swarming at hives*****
Eden	10	2019-05-06	11:07:00	14:04:00	Duke	267	Full Bloom	409	0	11	POINT (-122.85595522900552 45.051435493740556)	Joshr	pollinator survey, sunny, no clouds, light wind. 81 degrees *****Bees swarming at hives*****
Eden	11	2019-05-06	11:07:00	14:04:00	Duke	267	Full Bloom	409	0	7	POINT (-122.85598590572341 45.051331466925369)	Joshr	pollinator survey, sunny, no clouds, light wind. 81 degrees *****Bees swarming at hives*****
Eden	12	2019-05-06	11:07:00	14:04:00	Duke	267	Full Bloom	409	0	8	POINT (-122.85711480894204 45.051786582844876)	Joshr	pollinator survey, sunny, no clouds, light wind. 81 degrees *****Bees swarming at hives*****
Eden	13	2019-05-06	11:07:00	14:04:00	Duke	267	Full Bloom	409	0	15	POINT (-122.85713321497278 45.051643546803284)	Joshr	pollinator survey, sunny, no clouds, light wind. 81 degrees *****Bees swarming at hives*****
Eden	14	2019-05-06	11:07:00	14:04:00	Duke	267	Full Bloom	409	0	6	POINT (-122.85713321497278 45.051526517048629)	Joshr	pollinator survey, sunny, no clouds, light wind. 81 degrees *****Bees swarming at hives*****
Eden	15	2019-05-06	11:07:00	14:04:00	Duke	267	Full Bloom	409	0	9	POINT (-122.85713321497278 45.051379145905813)	Joshr	pollinator survey, sunny, no clouds, light wind. 81 degrees *****Bees swarming at hives*****
Eden	16	2019-05-06	11:07:00	14:04:00	Duke	267	Full Bloom	409	0	23	POINT (-122.85715162100352 45.051166757414393)	Joshr	pollinator survey, sunny, no clouds, light wind. 81 degrees *****Bees swarming at hives*****
Eden	17	2019-05-06	11:07:00	14:04:00	Duke	267	Full Bloom	409	0	7	POINT (-122.85716389169066 45.050989043988942)	Joshr	pollinator survey, sunny, no clouds, light wind. 81 degrees *****Bees swarming at hives*****
Eden	18	2019-05-06	11:07:00	14:04:00	Duke	267	Full Bloom	409	0	11	POINT (-122.85713935031634 45.050876347384254)	Joshr	pollinator survey, sunny, no clouds, light wind. 81 degrees *****Bees swarming at hives*****
Eden	19	2019-05-06	11:07:00	14:04:00	Duke	267	Full Bloom	409	0	13	POINT (-122.85713935031634 45.050754981561646)	Joshr	pollinator survey, sunny, no clouds, light wind. 81 degrees *****Bees swarming at hives*****
Eden	20	2019-05-06	11:07:00	14:04:00	Duke	267	Full Bloom	409	0	6	POINT (-122.85713321497278 45.050616277449009)	Joshr	pollinator survey, sunny, no clouds, light wind. 81 degrees *****Bees swarming at hives*****
Eden	21	2019-05-06	11:07:00	14:04:00	Duke	267	Full Bloom	409	0	7	POINT (-122.8572700637615 45.0507381845303)	Joshr	pollinator survey, sunny, no clouds, light wind. 81 degrees *****Bees swarming at hives*****
Eden	22	2019-05-06	11:07:00	14:04:00	Duke	267	Full Bloom	409	0	5	POINT (-122.858233140449 45.050054938876571)	Joshr	pollinator survey, sunny, no clouds, light wind. 81 degrees *****Bees swarming at hives*****
Eden	23	2019-05-06	11:07:00	14:04:00	Duke	267	Full Bloom	409	0	4	POINT (-122.85822911083945 45.050259913429684)	Joshr	pollinator survey, sunny, no clouds, light wind. 81 degrees *****Bees swarming at hives*****
Eden	24	2019-05-06	11:07:00	14:04:00	Duke	267	Full Bloom	409	1	9	POINT (-122.8582371700586 45.050450652979016)	Joshr	pollinator survey, sunny, no clouds, light wind. 81 degrees *****Bees swarming at hives*****
Eden	25	2019-05-06	11:07:00	14:04:00	Duke	267	Full Bloom	409	0	1	POINT (-122.8582371700586 45.05063285135752)	Joshr	pollinator survey, sunny, no clouds, light wind. 81 degrees *****Bees swarming at hives*****
Eden	26	2019-05-06	11:07:00	14:04:00	Duke	267	Full Bloom	409	0	2	POINT (-122.8582492588873 45.050826436498696)	Joshr	pollinator survey, sunny, no clouds, light wind. 81 degrees *****Bees swarming at hives*****
Eden	27	2019-05-06	11:07:00	14:04:00	Duke	267	Full Bloom	409	0	1	POINT (-122.85827343654474 45.051022867810445)	Joshr	pollinator survey, sunny, no clouds, light wind. 81 degrees *****Bees swarming at hives*****
Eden	28	2019-05-06	11:07:00	14:04:00	Duke	267	Full Bloom	409	1	8	POINT (-122.85825731810642 45.051173749374385)	Joshr	pollinator survey, sunny, no clouds, light wind. 81 degrees *****Bees swarming at hives*****
Eden	29	2019-05-06	11:07:00	14:04:00	Duke	267	Full Bloom	409	0	13	POINT (-122.85827746615429 45.051387260341336)	Joshr	pollinator survey, sunny, no clouds, light wind. 81 degrees *****Bees swarming at hives*****
Eden	30	2019-05-06	11:07:00	14:04:00	Duke	267	Full Bloom	409	0	9	POINT (-122.85828552537343 45.051577996131051)	Joshr	pollinator survey, sunny, no clouds, light wind. 81 degrees *****Bees swarming at hives*****
Forest Hills	1	2019-05-06	14:52:00	15:21:00	Duke	405	Full Bloom	415	0	10	POINT (-123.02040275779729 45.480023369840779)	cinziab
Forest Hills	2	2019-05-06	14:52:00	15:21:00	Duke	405	Full Bloom	415	0	10	POINT (-123.02134505465406 45.480117897340278)	cinziab
Forest Hills	3	2019-05-06	14:52:00	15:21:00	Duke	405	Full Bloom	415	0	9	POINT (-123.02133336094134 45.4801827898132)	cinziab
Forest Hills	4	2019-05-06	14:52:00	15:21:00	Duke	405	Full Bloom	415	0	7	POINT (-123.02134587730635 45.480253862422074)	cinziab
Forest Hills	5	2019-05-06	14:52:00	15:21:00	Duke	405	Full Bloom	415	0	3	POINT (-123.02134017737029 45.480335564907335)	cinziab
Forest Hills	6	2019-05-06	14:52:00	15:21:00	Duke	405	Full Bloom	415	0	9	POINT (-123.02135710090602 45.480445490233024)	cinziab
Forest Hills	7	2019-05-06	14:52:00	15:21:00	Duke	405	Full Bloom	415	0	9	POINT (-123.02135040199683 45.480540294446143)	cinziab
Forest Hills	8	2019-05-06	14:52:00	15:21:00	Duke	405	Full Bloom	415	0	8	POINT (-123.02135856995397 45.480675352084432)	cinziab
Forest Hills	9	2019-05-06	14:52:00	15:21:00	Duke	405	Full Bloom	415	0	5	POINT (-123.02134875665577 45.480788243186566)	cinziab
Forest Hills	10	2019-05-06	14:52:00	15:21:00	Duke	405	Full Bloom	415	0	3	POINT (-123.02134011859634 45.480968126893544)	cinziab
Forest Hills	11	2019-05-06	14:52:00	15:21:00	Duke	405	Full Bloom	415	0	4	POINT (-123.02083394638642 45.480062124171155)	cinziab
Forest Hills	12	2019-05-06	14:52:00	15:21:00	Duke	405	Full Bloom	415	0	6	POINT (-123.0208256302443 45.480132355956925)	cinziab
Forest Hills	13	2019-05-06	14:52:00	15:21:00	Duke	405	Full Bloom	415	0	10	POINT (-123.0208317490318 45.480187465211145)	cinziab
Forest Hills	14	2019-05-06	14:52:00	15:21:00	Duke	405	Full Bloom	415	0	5	POINT (-123.02082796282741 45.480234349516593)	cinziab
Forest Hills	15	2019-05-06	14:52:00	15:21:00	Duke	405	Full Bloom	415	0	5	POINT (-123.02082049180675 45.480281020454044)	cinziab
Forest Hills	16	2019-05-06	14:52:00	15:21:00	Duke	405	Full Bloom	415	0	10	POINT (-123.02081581591665 45.480361677004879)	cinziab
Forest Hills	17	2019-05-06	14:52:00	15:21:00	Duke	405	Full Bloom	415	1	1	POINT (-123.02082000768137 45.480433332300549)	cinziab
Forest Hills	18	2019-05-06	14:52:00	15:21:00	Duke	405	Full Bloom	415	0	4	POINT (-123.02081831018567 45.480500542457776)	cinziab
Forest Hills	19	2019-05-06	14:52:00	15:21:00	Duke	405	Full Bloom	415	1	2	POINT (-123.02081675128046 45.480565396418825)	cinziab
Forest Hills	20	2019-05-06	14:52:00	15:21:00	Duke	405	Full Bloom	415	1	1	POINT (-123.02082475376271 45.480639504740111)	cinziab
Forest Hills	21	2019-05-06	14:52:00	15:21:00	Duke	405	Full Bloom	415	0	13	POINT (-123.02134451018586 45.480038610843621)	cinziab
Forest Hills	22	2019-05-06	14:52:00	15:21:00	Duke	405	Full Bloom	415	0	4	POINT (-123.02039768411578 45.4800799230629)	cinziab
Forest Hills	23	2019-05-06	14:52:00	15:21:00	Duke	405	Full Bloom	415	0	11	POINT (-123.02040031834831 45.480214097142948)	cinziab
Forest Hills	24	2019-05-06	14:52:00	15:21:00	Duke	405	Full Bloom	415	0	9	POINT (-123.02039902358958 45.480324667462753)	cinziab
Forest Hills	25	2019-05-06	14:52:00	15:21:00	Duke	405	Full Bloom	415	0	6	POINT (-123.02039779360071 45.480419078732268)	cinziab
Forest Hills	26	2019-05-06	14:52:00	15:21:00	Duke	405	Full Bloom	415	0	14	POINT (-123.02040148354749 45.480554295410684)	cinziab
Forest Hills	27	2019-05-06	14:52:00	15:21:00	Duke	405	Full Bloom	415	0	11	POINT (-123.02040472036141 45.480672808281554)	cinziab
Forest Hills	28	2019-05-06	14:52:00	15:21:00	Duke	405	Full Bloom	415	0	5	POINT (-123.02038898945538 45.480775071386176)	cinziab
Forest Hills	29	2019-05-06	14:52:00	15:21:00	Duke	405	Full Bloom	415	0	5	POINT (-123.0203483998241 45.48090620213722)	cinziab
Forest Hills	30	2019-05-06	14:52:00	15:21:00	Duke	405	Full Bloom	415	0	6	POINT (-123.02034432144154 45.481031431915682)	cinziab
PanAm	1	2019-05-06	10:59:00	12:12:00	Duke	473	Full Bloom	405	0	3	POINT (-122.94566546648613 45.0130194538505)	jeannettek	sunny, warm. 66F, wind 8mph. started 1125am finish 1235.
PanAm	2	2019-05-06	10:59:00	12:12:00	Duke	473	Full Bloom	405	0	0	POINT (-122.94531967928215 45.013023753851144)	jeannettek	sunny, warm. 66F, wind 8mph. started 1125am finish 1235.
PanAm	3	2019-05-06	10:59:00	12:12:00	Duke	473	Full Bloom	405	0	0	POINT (-122.94506984348875 45.013046543578611)	jeannettek	sunny, warm. 66F, wind 8mph. started 1125am finish 1235.
PanAm	4	2019-05-06	10:59:00	12:12:00	Duke	473	Full Bloom	405	0	1	POINT (-122.94485224457192 45.01303230000002)	jeannettek	sunny, warm. 66F, wind 8mph. started 1125am finish 1235.
PanAm	5	2019-05-06	10:59:00	12:12:00	Duke	473	Full Bloom	405	0	3	POINT (-122.94472329706565 45.013049392293937)	jeannettek	sunny, warm. 66F, wind 8mph. started 1125am finish 1235.
PanAm	6	2019-05-06	10:59:00	12:12:00	Duke	473	Full Bloom	405	0	2	POINT (-122.94452094619663 45.013029351283862)	jeannettek	sunny, warm. 66F, wind 8mph. started 1125am finish 1235.
PanAm	7	2019-05-06	10:59:00	12:12:00	Duke	473	Full Bloom	405	0	5	POINT (-122.9442509623554 45.0130378974319)	jeannettek	sunny, warm. 66F, wind 8mph. started 1125am finish 1235.
PanAm	8	2019-05-06	10:59:00	12:12:00	Duke	473	Full Bloom	405	0	1	POINT (-122.9439003863227 45.0130208051346)	jeannettek	sunny, warm. 66F, wind 8mph. started 1125am finish 1235.
PanAm	9	2019-05-06	10:59:00	12:12:00	Duke	473	Full Bloom	405	0	3	POINT (-122.94367472818674 45.013003712832187)	jeannettek	sunny, warm. 66F, wind 8mph. started 1125am finish 1235.
PanAm	10	2019-05-06	10:59:00	12:12:00	Duke	473	Full Bloom	405	0	1	POINT (-122.94346148848902 45.013012158983969)	jeannettek	sunny, warm. 66F, wind 8mph. started 1125am finish 1235.
PanAm	11	2019-05-06	10:59:00	12:12:00	Duke	473	Full Bloom	405	0	2	POINT (-122.94342462826479 45.012797956736051)	jeannettek	sunny, warm. 66F, wind 8mph. started 1125am finish 1235.
PanAm	12	2019-05-06	10:59:00	12:12:00	Duke	473	Full Bloom	405	0	4	POINT (-122.94363416796251 45.0128321414586)	jeannettek	sunny, warm. 66F, wind 8mph. started 1125am finish 1235.
PanAm	13	2019-05-06	10:59:00	12:12:00	Duke	473	Full Bloom	405	0	3	POINT (-122.94396056633775 45.012829292732519)	jeannettek	sunny, warm. 66F, wind 8mph. started 1125am finish 1235.
PanAm	14	2019-05-06	10:59:00	12:12:00	Duke	473	Full Bloom	405	0	0	POINT (-122.94427084627472 45.01287772105696)	jeannettek	sunny, warm. 66F, wind 8mph. started 1125am finish 1235.
PanAm	15	2019-05-06	10:59:00	12:12:00	Duke	473	Full Bloom	405	0	7	POINT (-122.94452068206814 45.012840687636107)	jeannettek	sunny, warm. 66F, wind 8mph. started 1125am finish 1235.
PanAm	16	2019-05-06	10:59:00	12:12:00	Duke	473	Full Bloom	405	0	1	POINT (-122.94458918543086 45.012852082537385)	jeannettek	sunny, warm. 66F, wind 8mph. started 1125am finish 1235.
PanAm	17	2019-05-06	10:59:00	12:12:00	Duke	473	Full Bloom	405	0	1	POINT (-122.94478663629987 45.01282929273254)	jeannettek	sunny, warm. 66F, wind 8mph. started 1125am finish 1235.
PanAm	18	2019-05-06	10:59:00	12:12:00	Duke	473	Full Bloom	405	0	0	POINT (-122.94506870896991 45.012846385087038)	jeannettek	sunny, warm. 66F, wind 8mph. started 1125am finish 1235.
PanAm	19	2019-05-06	10:59:00	12:12:00	Duke	473	Full Bloom	405	0	0	POINT (-122.9453507816399 45.012815049099935)	jeannettek	sunny, warm. 66F, wind 8mph. started 1125am finish 1235.
PanAm	20	2019-05-06	10:59:00	12:12:00	Duke	473	Full Bloom	405	0	1	POINT (-122.94549987719405 45.012815049099963)	jeannettek	sunny, warm. 66F, wind 8mph. started 1125am finish 1235.
PanAm	21	2019-05-06	10:59:00	12:12:00	Duke	473	Full Bloom	405	0	0	POINT (-122.94541928500254 45.012476049597865)	jeannettek	sunny, warm. 66F, wind 8mph. started 1125am finish 1235.
PanAm	22	2019-05-06	10:59:00	12:12:00	Duke	473	Full Bloom	405	0	3	POINT (-122.945104975456 45.012464654621787)	jeannettek	sunny, warm. 66F, wind 8mph. started 1125am finish 1235.
PanAm	23	2019-05-06	10:59:00	12:12:00	Duke	473	Full Bloom	405	0	0	POINT (-122.94479872512861 45.012473200854068)	jeannettek	sunny, warm. 66F, wind 8mph. started 1125am finish 1235.
PanAm	24	2019-05-06	10:59:00	12:12:00	Duke	473	Full Bloom	405	0	5	POINT (-122.94447635636294 45.012487444571711)	jeannettek	sunny, warm. 66F, wind 8mph. started 1125am finish 1235.
PanAm	25	2019-05-06	10:59:00	12:12:00	Duke	473	Full Bloom	405	0	1	POINT (-122.94414189876851 45.012495990800609)	jeannettek	sunny, warm. 66F, wind 8mph. started 1125am finish 1235.
PanAm	26	2019-05-06	10:59:00	12:12:00	Duke	473	Full Bloom	405	0	4	POINT (-122.94398474399527 45.012495990800609)	jeannettek	sunny, warm. 66F, wind 8mph. started 1125am finish 1235.
PanAm	27	2019-05-06	10:59:00	12:12:00	Duke	473	Full Bloom	405	0	0	POINT (-122.94380341156456 45.012490293314869)	jeannettek	sunny, warm. 66F, wind 8mph. started 1125am finish 1235.
PanAm	28	2019-05-06	10:59:00	12:12:00	Duke	473	Full Bloom	405	0	3	POINT (-122.94368655288699 45.012507385770533)	jeannettek	sunny, warm. 66F, wind 8mph. started 1125am finish 1235.
PanAm	29	2019-05-06	10:59:00	12:12:00	Duke	473	Full Bloom	405	0	1	POINT (-122.94357775342857 45.012473200854124)	jeannettek	sunny, warm. 66F, wind 8mph. started 1125am finish 1235.
PanAm	30	2019-05-06	10:59:00	12:12:00	Duke	473	Full Bloom	405	0	3	POINT (-122.94344477631272 45.0124703521102)	jeannettek	sunny, warm. 66F, wind 8mph. started 1125am finish 1235.
PanAm	1	2019-05-06	10:59:00	14:37:00	Liberty	474	25% Bloom	407	0	6	POINT (-122.94718181843838 45.015752754258408)	jeannettek	warm, sunny. 68F, 6 mph wind. started 1pm finish 225pm.
PanAm	2	2019-05-06	10:59:00	14:37:00	Liberty	474	25% Bloom	407	0	1	POINT (-122.94714152234269 45.015624567981263)	jeannettek	warm, sunny. 68F, 6 mph wind. started 1pm finish 225pm.
PanAm	3	2019-05-06	10:59:00	14:37:00	Liberty	474	25% Bloom	407	0	1	POINT (-122.94718181843837 45.015490684229853)	jeannettek	warm, sunny. 68F, 6 mph wind. started 1pm finish 225pm.
PanAm	4	2019-05-06	10:59:00	14:37:00	Liberty	474	25% Bloom	407	0	7	POINT (-122.94716972960968 45.015288433713941)	jeannettek	warm, sunny. 68F, 6 mph wind. started 1pm finish 225pm.
PanAm	5	2019-05-06	10:59:00	14:37:00	Liberty	474	25% Bloom	407	0	2	POINT (-122.94721002570537 45.014863990167932)	jeannettek	warm, sunny. 68F, 6 mph wind. started 1pm finish 225pm.
PanAm	6	2019-05-06	10:59:00	14:37:00	Liberty	474	25% Bloom	407	0	2	POINT (-122.94716167039054 45.0148070176404)	jeannettek	warm, sunny. 68F, 6 mph wind. started 1pm finish 225pm.
PanAm	7	2019-05-06	10:59:00	14:37:00	Liberty	474	25% Bloom	407	0	2	POINT (-122.94717375921925 45.014764288207544)	jeannettek	warm, sunny. 68F, 6 mph wind. started 1pm finish 225pm.
PanAm	8	2019-05-06	10:59:00	14:37:00	Liberty	474	25% Bloom	407	0	4	POINT (-122.94713749273311 45.014710164213511)	jeannettek	warm, sunny. 68F, 6 mph wind. started 1pm finish 225pm.
PanAm	9	2019-05-06	10:59:00	14:37:00	Liberty	474	25% Bloom	407	0	3	POINT (-122.94716972960968 45.014693072415284)	jeannettek	warm, sunny. 68F, 6 mph wind. started 1pm finish 225pm.
PanAm	10	2019-05-06	10:59:00	14:37:00	Liberty	474	25% Bloom	407	0	1	POINT (-122.94714958156183 45.014647494261766)	jeannettek	warm, sunny. 68F, 6 mph wind. started 1pm finish 225pm.
PanAm	11	2019-05-06	10:59:00	14:37:00	Liberty	474	25% Bloom	407	0	3	POINT (-122.94405741005194 45.01354822457315)	jeannettek	warm, sunny. 68F, 6 mph wind. started 1pm finish 225pm.
PanAm	12	2019-05-06	10:59:00	14:37:00	Liberty	474	25% Bloom	407	0	0	POINT (-122.9440372620041 45.013830244229325)	jeannettek	warm, sunny. 68F, 6 mph wind. started 1pm finish 225pm.
PanAm	13	2019-05-06	10:59:00	14:37:00	Liberty	474	25% Bloom	407	0	4	POINT (-122.94403323239457 45.014092321856708)	jeannettek	warm, sunny. 68F, 6 mph wind. started 1pm finish 225pm.
PanAm	14	2019-05-06	10:59:00	14:37:00	Liberty	474	25% Bloom	407	0	3	POINT (-122.94407352849026 45.014246149470722)	jeannettek	warm, sunny. 68F, 6 mph wind. started 1pm finish 225pm.
PanAm	15	2019-05-06	10:59:00	14:37:00	Liberty	474	25% Bloom	407	0	0	POINT (-122.94402517317536 45.014451252313393)	jeannettek	warm, sunny. 68F, 6 mph wind. started 1pm finish 225pm.
PanAm	16	2019-05-06	10:59:00	14:37:00	Liberty	474	25% Bloom	407	0	0	POINT (-122.94406546927107 45.014810180520378)	jeannettek	warm, sunny. 68F, 6 mph wind. started 1pm finish 225pm.
PanAm	17	2019-05-06	10:59:00	14:37:00	Liberty	474	25% Bloom	407	0	0	POINT (-122.9440493508328 45.015032373044939)	jeannettek	warm, sunny. 68F, 6 mph wind. started 1pm finish 225pm.
PanAm	18	2019-05-06	10:59:00	14:37:00	Liberty	474	25% Bloom	407	0	2	POINT (-122.9440654692711 45.015334325606737)	jeannettek	warm, sunny. 68F, 6 mph wind. started 1pm finish 225pm.
PanAm	19	2019-05-06	10:59:00	14:37:00	Liberty	474	25% Bloom	407	0	5	POINT (-122.94404935083283 45.015493847072108)	jeannettek	warm, sunny. 68F, 6 mph wind. started 1pm finish 225pm.
PanAm	20	2019-05-06	10:59:00	14:37:00	Liberty	474	25% Bloom	407	0	4	POINT (-122.94402920278496 45.015718885526539)	jeannettek	warm, sunny. 68F, 6 mph wind. started 1pm finish 225pm.
PanAm	21	2019-05-06	10:59:00	14:37:00	Liberty	474	25% Bloom	407	0	6	POINT (-122.94570954997612 45.015738825599975)	jeannettek	warm, sunny. 68F, 6 mph wind. started 1pm finish 225pm.
PanAm	22	2019-05-06	10:59:00	14:37:00	Liberty	474	25% Bloom	407	0	2	POINT (-122.94568940192826 45.015539424551932)	jeannettek	warm, sunny. 68F, 6 mph wind. started 1pm finish 225pm.
PanAm	23	2019-05-06	10:59:00	14:37:00	Liberty	474	25% Bloom	407	0	5	POINT (-122.94567328348997 45.015362811615219)	jeannettek	warm, sunny. 68F, 6 mph wind. started 1pm finish 225pm.
PanAm	24	2019-05-06	10:59:00	14:37:00	Liberty	474	25% Bloom	407	0	3	POINT (-122.94570149075697 45.015166257867818)	jeannettek	warm, sunny. 68F, 6 mph wind. started 1pm finish 225pm.
PanAm	25	2019-05-06	10:59:00	14:37:00	Liberty	474	25% Bloom	407	0	2	POINT (-122.94570149075697 45.014952611725029)	jeannettek	warm, sunny. 68F, 6 mph wind. started 1pm finish 225pm.
PanAm	26	2019-05-06	10:59:00	14:37:00	Liberty	474	25% Bloom	407	0	4	POINT (-122.94570552036656 45.0144597982492)	jeannettek	warm, sunny. 68F, 6 mph wind. started 1pm finish 225pm.
PanAm	27	2019-05-06	10:59:00	14:37:00	Liberty	474	25% Bloom	407	0	0	POINT (-122.945701490757 45.014303122556328)	jeannettek	warm, sunny. 68F, 6 mph wind. started 1pm finish 225pm.
PanAm	28	2019-05-06	10:59:00	14:37:00	Liberty	474	25% Bloom	407	0	7	POINT (-122.94572163880484 45.013941342500509)	jeannettek	warm, sunny. 68F, 6 mph wind. started 1pm finish 225pm.
PanAm	29	2019-05-06	10:59:00	14:37:00	Liberty	474	25% Bloom	407	0	2	POINT (-122.94570149075702 45.013833092905749)	jeannettek	warm, sunny. 68F, 6 mph wind. started 1pm finish 225pm.
PanAm	30	2019-05-06	10:59:00	14:37:00	Liberty	474	25% Bloom	407	0	2	POINT (-122.94572566841444 45.013613744415245)	jeannettek	warm, sunny. 68F, 6 mph wind. started 1pm finish 225pm.
Eden	2	2019-05-06	12:35:00	13:13:00	Liberty	1032	Full Bloom	410	0	21	POINT (-122.85753884723981 45.054430131889063)	Joshr	sunny, no clouds, slight wind, Draper, pollinator survey 71 degrees
Eden	4	2019-05-06	12:35:00	13:13:00	Liberty	1032	Full Bloom	410	0	18	POINT (-122.85748746904137 45.0547890513798)	Joshr	sunny, no clouds, slight wind, Draper, pollinator survey 71 degrees
Eden	5	2019-05-06	12:35:00	13:13:00	Liberty	1032	Full Bloom	410	0	42	POINT (-122.85750459510751 45.054627739527838)	Joshr	sunny, no clouds, slight wind, Draper, pollinator survey 71 degrees
Eden	6	2019-05-06	12:35:00	13:13:00	Liberty	1032	Full Bloom	410	0	22	POINT (-122.85749317773008 45.05449868971867)	Joshr	sunny, no clouds, slight wind, Draper, pollinator survey 71 degrees
Eden	7	2019-05-06	12:35:00	13:13:00	Liberty	1032	Full Bloom	410	0	16	POINT (-122.85753884723981 45.054244622055741)	Joshr	sunny, no clouds, slight wind, Draper, pollinator survey 71 degrees
Eden	8	2019-05-06	12:35:00	13:13:00	Liberty	1032	Full Bloom	410	0	14	POINT (-122.85755597330596 45.053643727377178)	Joshr	sunny, no clouds, slight wind, Draper, pollinator survey 71 degrees
Eden	9	2019-05-06	12:35:00	13:13:00	Liberty	1032	Full Bloom	410	0	13	POINT (-122.85751601248495 45.0539703890259)	Joshr	sunny, no clouds, slight wind, Draper, pollinator survey 71 degrees
Eden	10	2019-05-06	12:35:00	13:13:00	Liberty	1032	Full Bloom	410	0	11	POINT (-122.85752742986239 45.053764713390549)	Joshr	sunny, no clouds, slight wind, Draper, pollinator survey 71 degrees
Eden	11	2019-05-06	12:35:00	13:13:00	Liberty	1032	Full Bloom	410	0	14	POINT (-122.85639745018261 45.054978579800675)	Joshr	sunny, no clouds, slight wind, Draper, pollinator survey 71 degrees
Eden	12	2019-05-06	12:35:00	13:13:00	Liberty	1032	Full Bloom	410	1	17	POINT (-122.8564095390113 45.054870407803463)	Joshr	sunny, no clouds, slight wind, Draper, pollinator survey 71 degrees
Eden	13	2019-05-06	12:35:00	13:13:00	Liberty	1032	Full Bloom	410	0	25	POINT (-122.85638133174432 45.054725229275071)	Joshr	sunny, no clouds, slight wind, Draper, pollinator survey 71 degrees
Eden	14	2019-05-06	12:35:00	13:13:00	Liberty	1032	Full Bloom	410	0	17	POINT (-122.85637327252518 45.054591436971556)	Joshr	sunny, no clouds, slight wind, Draper, pollinator survey 71 degrees
Eden	15	2019-05-06	12:35:00	13:13:00	Liberty	1032	Full Bloom	410	0	14	POINT (-122.85639342057304 45.054471877627009)	Joshr	sunny, no clouds, slight wind, Draper, pollinator survey 71 degrees
Eden	16	2019-05-06	12:35:00	13:13:00	Liberty	1032	Full Bloom	410	0	26	POINT (-122.85639342057304 45.0543409313914)	Joshr	sunny, no clouds, slight wind, Draper, pollinator survey 71 degrees
Eden	17	2019-05-06	12:35:00	13:13:00	Liberty	1032	Full Bloom	410	0	18	POINT (-122.85638939096346 45.0541416648054)	Joshr	sunny, no clouds, slight wind, Draper, pollinator survey 71 degrees
Eden	18	2019-05-06	12:35:00	13:13:00	Liberty	1032	Full Bloom	410	0	27	POINT (-122.85640147979217 45.053982251036672)	Joshr	sunny, no clouds, slight wind, Draper, pollinator survey 71 degrees
Eden	19	2019-05-06	12:35:00	13:13:00	Liberty	1032	Full Bloom	410	0	29	POINT (-122.85638536135387 45.0538171434506)	Joshr	sunny, no clouds, slight wind, Draper, pollinator survey 71 degrees
Eden	20	2019-05-06	12:35:00	13:13:00	Liberty	1032	Full Bloom	410	0	16	POINT (-122.85641356862087 45.05512091106425)	Joshr	sunny, no clouds, slight wind, Draper, pollinator survey 71 degrees
Eden	21	2019-05-06	12:35:00	13:13:00	Liberty	1032	Full Bloom	410	0	15	POINT (-122.85644580549747 45.05430677145452)	Joshr	sunny, no clouds, slight wind, Draper, pollinator survey 71 degrees
Eden	22	2019-05-06	12:35:00	13:13:00	Liberty	1032	Full Bloom	410	0	28	POINT (-122.85583733445222 45.055149377274468)	Joshr	sunny, no clouds, slight wind, Draper, pollinator survey 71 degrees
Eden	23	2019-05-06	12:35:00	13:13:00	Liberty	1032	Full Bloom	410	0	31	POINT (-122.85576883108949 45.055061131976721)	Joshr	sunny, no clouds, slight wind, Draper, pollinator survey 71 degrees
Eden	24	2019-05-06	12:35:00	13:13:00	Liberty	1032	Full Bloom	410	0	27	POINT (-122.85581718640435 45.054938726983409)	Joshr	sunny, no clouds, slight wind, Draper, pollinator survey 71 degrees
Eden	25	2019-05-06	12:35:00	13:13:00	Liberty	1032	Full Bloom	410	0	39	POINT (-122.85582524562352 45.0547992419042)	Joshr	sunny, no clouds, slight wind, Draper, pollinator survey 71 degrees
Eden	26	2019-05-06	12:35:00	13:13:00	Liberty	1032	Full Bloom	410	0	25	POINT (-122.85580509757564 45.054639829968536)	Joshr	sunny, no clouds, slight wind, Draper, pollinator survey 71 degrees
Eden	27	2019-05-06	12:35:00	13:13:00	Liberty	1032	Full Bloom	410	0	16	POINT (-122.85580106796608 45.054486110895404)	Joshr	sunny, no clouds, slight wind, Draper, pollinator survey 71 degrees
Eden	28	2019-05-06	12:35:00	13:13:00	Liberty	1032	Full Bloom	410	0	14	POINT (-122.85581315679478 45.054352318032493)	Joshr	sunny, no clouds, slight wind, Draper, pollinator survey 71 degrees
Eden	29	2019-05-06	12:35:00	13:13:00	Liberty	1032	Full Bloom	410	0	22	POINT (-122.85580509757564 45.054155898155983)	Joshr	sunny, no clouds, slight wind, Draper, pollinator survey 71 degrees
Eden	30	2019-05-06	12:35:00	13:13:00	Liberty	1032	Full Bloom	410	0	26	POINT (-122.85582927523308 45.053956630925249)	Joshr	sunny, no clouds, slight wind, Draper, pollinator survey 71 degrees
Eden	3	2019-05-06	12:35:00	13:13:00	Liberty	1032	Full Bloom	410		16	POINT (-122.8574703429752 45.054889871056233)	Joshr	sunny, no clouds, slight wind, Draper, pollinator survey 71 degrees
Eden	1	2019-05-06	12:35:00	13:13:00	Liberty	1032	Full Bloom	410		19	POINT (-122.85745321690906 45.05508747710639)	Joshr	sunny, no clouds, slight wind, Draper, pollinator survey 71 degrees
Verboort	1	2019-05-03	14:54:00	14:55:00	Liberty	1011	25% Bloom	396	0	0	POINT (-123.07875241242213 45.547974206676052)	angiem
Verboort	2	2019-05-03	14:54:00	14:55:00	Liberty	1011	25% Bloom	396	0	6	POINT (-123.07902755695538 45.547979437668133)	angiem
Verboort	3	2019-05-03	14:54:00	14:55:00	Liberty	1011	25% Bloom	396	0	2	POINT (-123.07930741555191 45.5479824999846)	angiem
Verboort	4	2019-05-03	14:54:00	14:55:00	Liberty	1011	25% Bloom	396	0	4	POINT (-123.07960913810128 45.548013123140464)	angiem
Verboort	5	2019-05-03	14:54:00	14:55:00	Liberty	1011	25% Bloom	396	0	2	POINT (-123.07987150553554 45.548028434712165)	angiem
Verboort	6	2019-05-03	14:54:00	14:55:00	Liberty	1011	25% Bloom	396	0	6	POINT (-123.08029129343032 45.548010060825654)	angiem
Verboort	7	2019-05-03	14:54:00	14:55:00	Liberty	1011	25% Bloom	396	0	3	POINT (-123.08076355481195 45.548028434712165)	angiem
Verboort	8	2019-05-03	14:54:00	14:55:00	Liberty	1011	25% Bloom	396	0	8	POINT (-123.08108714131419 45.548013123140464)	angiem
Verboort	9	2019-05-03	14:54:00	14:55:00	Liberty	1011	25% Bloom	396	0	3	POINT (-123.08134513595789 45.548019247769659)	angiem
Verboort	10	2019-05-03	14:54:00	14:55:00	Liberty	1011	25% Bloom	396	0	2	POINT (-123.08163811292613 45.548028434712165)	angiem
Verboort	11	2019-05-03	14:54:00	14:55:00	Liberty	1011	25% Bloom	396	0	9	POINT (-123.07880454463626 45.547890630416894)	angiem
Verboort	12	2019-05-03	14:54:00	14:55:00	Liberty	1011	25% Bloom	396	0	1	POINT (-123.07904504811765 45.547915128982986)	angiem
Verboort	13	2019-05-03	14:54:00	14:55:00	Liberty	1011	25% Bloom	396	0	4	POINT (-123.0793511434576 45.547930440581347)	angiem
Verboort	14	2019-05-03	14:54:00	14:55:00	Liberty	1011	25% Bloom	396	0	4	POINT (-123.07961351089187 45.547948814493893)	angiem
Verboort	15	2019-05-03	14:54:00	14:55:00	Liberty	1011	25% Bloom	396	0	3	POINT (-123.07985401437323 45.547933502900513)	angiem
Verboort	16	2019-05-03	14:54:00	14:55:00	Liberty	1011	25% Bloom	396	0	5	POINT (-123.08031753017374 45.54792737826201)	angiem
Verboort	17	2019-05-03	14:54:00	14:55:00	Liberty	1011	25% Bloom	396	0	8	POINT (-123.08074169085911 45.547936565219523)	angiem
Verboort	18	2019-05-03	14:54:00	14:55:00	Liberty	1011	25% Bloom	396	0	7	POINT (-123.08110025968591 45.547930440581347)	angiem
Verboort	20	2019-05-03	14:54:00	14:55:00	Liberty	1011	25% Bloom	396	0	6	POINT (-123.08162499455442 45.547930440581347)	angiem
Verboort	21	2019-05-03	14:54:00	14:55:00	Liberty	1011	25% Bloom	396	0	2	POINT (-123.07880891742683 45.547798760699052)	angiem
Verboort	22	2019-05-03	14:54:00	14:55:00	Liberty	1011	25% Bloom	396	0	7	POINT (-123.07904504811765 45.547856944871128)	angiem
Verboort	23	2019-05-03	14:54:00	14:55:00	Liberty	1011	25% Bloom	396	2	2	POINT (-123.07932927950475 45.547863069517319)	angiem
Verboort	24	2019-05-03	14:54:00	14:55:00	Liberty	1011	25% Bloom	396	0	5	POINT (-123.07960039252015 45.547875318807691)	angiem
Verboort	25	2019-05-03	14:54:00	14:55:00	Liberty	1011	25% Bloom	396	0	2	POINT (-123.0798583871638 45.547838570928562)	angiem
Verboort	27	2019-05-03	14:54:00	14:55:00	Liberty	1011	25% Bloom	396	0	3	POINT (-123.08075043644024 45.547890630416894)	angiem
Verboort	28	2019-05-03	14:54:00	14:55:00	Liberty	1011	25% Bloom	396	0	0	POINT (-123.08106527736135 45.547863069517319)	angiem
Verboort	29	2019-05-03	14:54:00	14:55:00	Liberty	1011	25% Bloom	396	0	2	POINT (-123.08130578084274 45.547890630416894)	angiem
Verboort	30	2019-05-03	14:54:00	14:55:00	Liberty	1011	25% Bloom	396	0	6	POINT (-123.08157689385811 45.547878381129863)	angiem
Casale	1	2019-05-01	11:15:00	15:46:00	Liberty	1149	First Bloom	358	0	0	POINT (-122.78183679096402 45.281230280416906)	jeannettek	warm, sunny. 65F, 7 mph wind. started 220. bloom 40 to 70
Casale	2	2019-05-01	11:15:00	15:46:00	Liberty	1149	First Bloom	358	0	2	POINT (-122.78180996887384 45.281067974442493)	jeannettek	warm, sunny. 65F, 7 mph wind. started 220. bloom 40 to 70
Casale	3	2019-05-01	11:15:00	15:46:00	Liberty	1149	First Bloom	358	0	0	POINT (-122.78182606212795 45.280913217150783)	jeannettek	warm, sunny. 65F, 7 mph wind. started 220. bloom 40 to 70
Casale	4	2019-05-01	11:15:00	15:46:00	Liberty	1149	First Bloom	358	0	1	POINT (-122.78180996887384 45.2807622340203)	jeannettek	warm, sunny. 65F, 7 mph wind. started 220. bloom 40 to 70
Casale	5	2019-05-01	11:15:00	15:46:00	Liberty	1149	First Bloom	358	0	1	POINT (-122.78180996887384 45.280596152112736)	jeannettek	warm, sunny. 65F, 7 mph wind. started 220. bloom 40 to 70
Casale	6	2019-05-01	11:15:00	15:46:00	Liberty	1149	First Bloom	358	0	14	POINT (-122.78180996887384 45.280452717346805)	jeannettek	warm, sunny. 65F, 7 mph wind. started 220. bloom 40 to 70
Casale	7	2019-05-01	11:15:00	15:46:00	Liberty	1149	First Bloom	358	0	1	POINT (-122.78180996887384 45.280347028339889)	jeannettek	warm, sunny. 65F, 7 mph wind. started 220. bloom 40 to 70
Casale	8	2019-05-01	11:15:00	15:46:00	Liberty	1149	First Bloom	358	0	3	POINT (-122.78180460445581 45.280203592944133)	jeannettek	warm, sunny. 65F, 7 mph wind. started 220. bloom 40 to 70
Casale	9	2019-05-01	11:15:00	15:46:00	Liberty	1149	First Bloom	358	0	4	POINT (-122.78179387561975 45.279962016721157)	jeannettek	warm, sunny. 65F, 7 mph wind. started 220. bloom 40 to 70
Casale	10	2019-05-01	11:15:00	15:46:00	Liberty	1149	First Bloom	358	0	11	POINT (-122.78178314678372 45.279803481765839)	jeannettek	warm, sunny. 65F, 7 mph wind. started 220. bloom 40 to 70
Casale	11	2019-05-01	11:15:00	15:46:00	Liberty	1149	First Bloom	358	0	3	POINT (-122.78256257995962 45.279783075076466)	jeannettek	warm, sunny. 65F, 7 mph wind. started 220. bloom 40 to 70
Casale	12	2019-05-01	11:15:00	15:46:00	Liberty	1149	First Bloom	358	0	2	POINT (-122.78258403763174 45.279979356455016)	jeannettek	warm, sunny. 65F, 7 mph wind. started 220. bloom 40 to 70
Casale	13	2019-05-01	11:15:00	15:46:00	Liberty	1149	First Bloom	358	0	6	POINT (-122.78257171623409 45.28028663453324)	jeannettek	warm, sunny. 65F, 7 mph wind. started 220. bloom 40 to 70
Casale	14	2019-05-01	11:15:00	15:46:00	Liberty	1149	First Bloom	358	0	2	POINT (-122.78257708065212 45.2804640411573)	jeannettek	warm, sunny. 65F, 7 mph wind. started 220. bloom 40 to 70
Casale	15	2019-05-01	11:15:00	15:46:00	Liberty	1149	First Bloom	358	0	7	POINT (-122.78257330879569 45.280688983466177)	jeannettek	warm, sunny. 65F, 7 mph wind. started 220. bloom 40 to 70
Casale	16	2019-05-01	11:15:00	15:46:00	Liberty	1149	First Bloom	358	0	1	POINT (-122.7825947664678 45.280839966791547)	jeannettek	warm, sunny. 65F, 7 mph wind. started 220. bloom 40 to 70
Casale	17	2019-05-01	11:15:00	15:46:00	Liberty	1149	First Bloom	358	0	3	POINT (-122.78258403763174 45.280968302302227)	jeannettek	warm, sunny. 65F, 7 mph wind. started 220. bloom 40 to 70
Casale	18	2019-05-01	11:15:00	15:46:00	Liberty	1149	First Bloom	358	0	1	POINT (-122.7825947664678 45.281058891899676)	jeannettek	warm, sunny. 65F, 7 mph wind. started 220. bloom 40 to 70
Casale	19	2019-05-01	11:15:00	15:46:00	Liberty	1149	First Bloom	358	0	5	POINT (-122.78260549530387 45.281179677804658)	jeannettek	warm, sunny. 65F, 7 mph wind. started 220. bloom 40 to 70
Casale	20	2019-05-01	11:15:00	15:46:00	Liberty	1149	First Bloom	358	0	12	POINT (-122.78261622413993 45.281285365260544)	jeannettek	warm, sunny. 65F, 7 mph wind. started 220. bloom 40 to 70
Casale	21	2019-05-01	11:15:00	15:46:00	Liberty	1149	First Bloom	358	0	1	POINT (-122.78322776779534 45.2812702670646)	jeannettek	warm, sunny. 65F, 7 mph wind. started 220. bloom 40 to 70
Casale	22	2019-05-01	11:15:00	15:46:00	Liberty	1149	First Bloom	358	0	5	POINT (-122.78324922546742 45.281172128693129)	jeannettek	warm, sunny. 65F, 7 mph wind. started 220. bloom 40 to 70
Casale	23	2019-05-01	11:15:00	15:46:00	Liberty	1149	First Bloom	358	0	3	POINT (-122.78323849663138 45.28102869538327)	jeannettek	warm, sunny. 65F, 7 mph wind. started 220. bloom 40 to 70
Casale	24	2019-05-01	11:15:00	15:46:00	Liberty	1149	First Bloom	358	0	8	POINT (-122.78323849663138 45.280885261710807)	jeannettek	warm, sunny. 65F, 7 mph wind. started 220. bloom 40 to 70
Casale	25	2019-05-01	11:15:00	15:46:00	Liberty	1149	First Bloom	358	0	5	POINT (-122.7831848524511 45.280711630990595)	jeannettek	warm, sunny. 65F, 7 mph wind. started 220. bloom 40 to 70
Casale	26	2019-05-01	11:15:00	15:46:00	Liberty	1149	First Bloom	358	0	8	POINT (-122.78322776779534 45.280560647323711)	jeannettek	warm, sunny. 65F, 7 mph wind. started 220. bloom 40 to 70
Casale	27	2019-05-01	11:15:00	15:46:00	Liberty	1149	First Bloom	358	0	9	POINT (-122.78323849663138 45.280371917175074)	jeannettek	warm, sunny. 65F, 7 mph wind. started 220. bloom 40 to 70
Casale	28	2019-05-01	11:15:00	15:46:00	Liberty	1149	First Bloom	358	0	5	POINT (-122.78323849663138 45.280228481842272)	jeannettek	warm, sunny. 65F, 7 mph wind. started 220. bloom 40 to 70
Casale	29	2019-05-01	11:15:00	15:46:00	Liberty	1149	First Bloom	358	0	4	POINT (-122.78321703895926 45.27992651153528)	jeannettek	warm, sunny. 65F, 7 mph wind. started 220. bloom 40 to 70
Casale	30	2019-05-01	11:15:00	15:46:00	Liberty	1149	First Bloom	358	0	7	POINT (-122.78320631012321 45.279730229973893)	jeannettek	warm, sunny. 65F, 7 mph wind. started 220. bloom 40 to 70
Casale	1	2019-05-01	11:15:00	13:50:00	Duke	1193	25% Bloom	357	0	5	POINT (-122.79207905754446 45.27575160734574)	jeannettek	warm, sunny. 63F, 5 mph wind. started 1240pm. bloom 50 to 70.
Casale	2	2019-05-01	11:15:00	13:50:00	Duke	1193	25% Bloom	357	0	4	POINT (-122.79206832870841 45.275691208647743)	jeannettek	warm, sunny. 63F, 5 mph wind. started 1240pm. bloom 50 to 70.
Casale	3	2019-05-01	11:15:00	13:50:00	Duke	1193	25% Bloom	357	0	0	POINT (-122.79204687103628 45.275540211621546)	jeannettek	warm, sunny. 63F, 5 mph wind. started 1240pm. bloom 50 to 70.
Casale	4	2019-05-01	11:15:00	13:50:00	Duke	1193	25% Bloom	357	0	1	POINT (-122.79204687103626 45.275404313954425)	jeannettek	warm, sunny. 63F, 5 mph wind. started 1240pm. bloom 50 to 70.
Casale	5	2019-05-01	11:15:00	13:50:00	Duke	1193	25% Bloom	357	0	3	POINT (-122.79204687103626 45.2752986155439)	jeannettek	warm, sunny. 63F, 5 mph wind. started 1240pm. bloom 50 to 70.
Casale	6	2019-05-01	11:15:00	13:50:00	Duke	1193	25% Bloom	357	0	2	POINT (-122.7920683287084 45.275102317973506)	jeannettek	warm, sunny. 63F, 5 mph wind. started 1240pm. bloom 50 to 70.
Casale	7	2019-05-01	11:15:00	13:50:00	Duke	1193	25% Bloom	357	0	0	POINT (-122.79204687103626 45.274792770425108)	jeannettek	warm, sunny. 63F, 5 mph wind. started 1240pm. bloom 50 to 70.
Casale	8	2019-05-01	11:15:00	13:50:00	Duke	1193	25% Bloom	357	0	2	POINT (-122.79202541336414 45.27468707087553)	jeannettek	warm, sunny. 63F, 5 mph wind. started 1240pm. bloom 50 to 70.
Casale	9	2019-05-01	11:15:00	13:50:00	Duke	1193	25% Bloom	357	0	5	POINT (-122.79202541336414 45.274566271149212)	jeannettek	warm, sunny. 63F, 5 mph wind. started 1240pm. bloom 50 to 70.
Casale	10	2019-05-01	11:15:00	13:50:00	Duke	1193	25% Bloom	357	0	0	POINT (-122.79202541336414 45.274445471165762)	jeannettek	warm, sunny. 63F, 5 mph wind. started 1240pm. bloom 50 to 70.
Casale	11	2019-05-01	11:15:00	13:50:00	Duke	1193	25% Bloom	357	0	2	POINT (-122.79169281944633 45.275812005979418)	jeannettek	warm, sunny. 63F, 5 mph wind. started 1240pm. bloom 50 to 70.
Casale	12	2019-05-01	11:15:00	13:50:00	Duke	1193	25% Bloom	357	0	3	POINT (-122.79168049804863 45.275696517129632)	jeannettek	warm, sunny. 63F, 5 mph wind. started 1240pm. bloom 50 to 70.
Casale	13	2019-05-01	11:15:00	13:50:00	Duke	1193	25% Bloom	357	0	1	POINT (-122.79168049804863 45.275575719552137)	jeannettek	warm, sunny. 63F, 5 mph wind. started 1240pm. bloom 50 to 70.
Casale	14	2019-05-01	11:15:00	13:50:00	Duke	1193	25% Bloom	357	0	3	POINT (-122.7916590403765 45.27544359690728)	jeannettek	warm, sunny. 63F, 5 mph wind. started 1240pm. bloom 50 to 70.
Casale	15	2019-05-01	11:15:00	13:50:00	Duke	1193	25% Bloom	357	0	0	POINT (-122.79164831154046 45.275292599222212)	jeannettek	warm, sunny. 63F, 5 mph wind. started 1240pm. bloom 50 to 70.
Casale	16	2019-05-01	11:15:00	13:50:00	Duke	1193	25% Bloom	357	0	1	POINT (-122.7916375827044 45.275115176428869)	jeannettek	warm, sunny. 63F, 5 mph wind. started 1240pm. bloom 50 to 70.
Casale	17	2019-05-01	11:15:00	13:50:00	Duke	1193	25% Bloom	357	0	1	POINT (-122.79166976921259 45.274850928687073)	jeannettek	warm, sunny. 63F, 5 mph wind. started 1240pm. bloom 50 to 70.
Casale	18	2019-05-01	11:15:00	13:50:00	Duke	1193	25% Bloom	357	0	4	POINT (-122.79169281944628 45.274800320385395)	jeannettek	warm, sunny. 63F, 5 mph wind. started 1240pm. bloom 50 to 70.
Casale	19	2019-05-01	11:15:00	13:50:00	Duke	1193	25% Bloom	357	0	0	POINT (-122.79167513363063 45.274733904293981)	jeannettek	warm, sunny. 63F, 5 mph wind. started 1240pm. bloom 50 to 70.
Casale	20	2019-05-01	11:15:00	13:50:00	Duke	1193	25% Bloom	357	0	0	POINT (-122.79168049804866 45.274480979781345)	jeannettek	warm, sunny. 63F, 5 mph wind. started 1240pm. bloom 50 to 70.
Casale	21	2019-05-01	11:15:00	13:50:00	Duke	1193	25% Bloom	357	0	0	POINT (-122.79127439484 45.275804456153708)	jeannettek	warm, sunny. 63F, 5 mph wind. started 1240pm. bloom 50 to 70.
Casale	22	2019-05-01	11:15:00	13:50:00	Duke	1193	25% Bloom	357	0	2	POINT (-122.79124598018825 45.27565876791428)	jeannettek	warm, sunny. 63F, 5 mph wind. started 1240pm. bloom 50 to 70.
Casale	23	2019-05-01	11:15:00	13:50:00	Duke	1193	25% Bloom	357	0	1	POINT (-122.79122988693416 45.275522870531091)	jeannettek	warm, sunny. 63F, 5 mph wind. started 1240pm. bloom 50 to 70.
Casale	24	2019-05-01	11:15:00	13:50:00	Duke	1193	25% Bloom	357	0	2	POINT (-122.79124220833182 45.275253316164878)	jeannettek	warm, sunny. 63F, 5 mph wind. started 1240pm. bloom 50 to 70.
Casale	25	2019-05-01	11:15:00	13:50:00	Duke	1193	25% Bloom	357	0	0	POINT (-122.79123147949576 45.275117417810719)	jeannettek	warm, sunny. 63F, 5 mph wind. started 1240pm. bloom 50 to 70.
Casale	26	2019-05-01	11:15:00	13:50:00	Duke	1193	25% Bloom	357	0	1	POINT (-122.79123525135219 45.275043452163487)	jeannettek	warm, sunny. 63F, 5 mph wind. started 1240pm. bloom 50 to 70.
Casale	27	2019-05-01	11:15:00	13:50:00	Duke	1193	25% Bloom	357	0	0	POINT (-122.79124220833179 45.274807870344688)	jeannettek	warm, sunny. 63F, 5 mph wind. started 1240pm. bloom 50 to 70.
Casale	28	2019-05-01	11:15:00	13:50:00	Duke	1193	25% Bloom	357	0	2	POINT (-122.79124220833179 45.274717270766928)	jeannettek	warm, sunny. 63F, 5 mph wind. started 1240pm. bloom 50 to 70.
Casale	29	2019-05-01	11:15:00	13:50:00	Duke	1193	25% Bloom	357	0	2	POINT (-122.79123147949578 45.274573821139654)	jeannettek	warm, sunny. 63F, 5 mph wind. started 1240pm. bloom 50 to 70.
Casale	30	2019-05-01	11:15:00	13:50:00	Duke	1193	25% Bloom	357	0	4	POINT (-122.79122075065972 45.274437921158267)	jeannettek	warm, sunny. 63F, 5 mph wind. started 1240pm. bloom 50 to 70.
Forest Hills	1	2019-04-29	14:42:00	15:47:00	Duke	405	Full Bloom	328	0	7	POINT (-123.02136767981609 45.48005398380149)	cinziab	sunny, 66, bumblebees are around
Forest Hills	2	2019-04-29	14:42:00	15:47:00	Duke	405	Full Bloom	328	0	14	POINT (-123.0213799143127 45.480142094175179)	cinziab	sunny, 66, bumblebees are around
Forest Hills	3	2019-04-29	14:42:00	15:47:00	Duke	405	Full Bloom	328	0	13	POINT (-123.02138242309559 45.480099640462122)	cinziab	sunny, 66, bumblebees are around
Forest Hills	4	2019-04-29	14:42:00	15:47:00	Duke	405	Full Bloom	328	0	24	POINT (-123.02138094259995 45.4800393760482)	cinziab	sunny, 66, bumblebees are around
Forest Hills	5	2019-04-29	14:42:00	15:47:00	Duke	405	Full Bloom	328	0	14	POINT (-123.02139527597063 45.480178387631412)	cinziab	sunny, 66, bumblebees are around
Forest Hills	6	2019-04-29	14:42:00	15:47:00	Duke	405	Full Bloom	328	0	6	POINT (-123.02142125585385 45.480264575608409)	cinziab	sunny, 66, bumblebees are around
Forest Hills	7	2019-04-29	14:42:00	15:47:00	Duke	405	Full Bloom	328	0	22	POINT (-123.02141603683646 45.48030774508296)	cinziab	sunny, 66, bumblebees are around
Forest Hills	8	2019-04-29	14:42:00	15:47:00	Duke	405	Full Bloom	328	0	16	POINT (-123.02140885523151 45.480359551259227)	cinziab	sunny, 66, bumblebees are around
Forest Hills	9	2019-04-29	14:42:00	15:47:00	Duke	405	Full Bloom	328	0	9	POINT (-123.02142110293659 45.480380892993523)	cinziab	sunny, 66, bumblebees are around
Forest Hills	10	2019-04-29	14:42:00	15:47:00	Duke	405	Full Bloom	328	0	5	POINT (-123.02143564999604 45.480419423460347)	cinziab	sunny, 66, bumblebees are around
Forest Hills	11	2019-04-29	14:42:00	15:47:00	Duke	405	Full Bloom	328	0	11	POINT (-123.02128048938076 45.480052356754136)	cinziab	sunny, 66, bumblebees are around
Forest Hills	12	2019-04-29	14:42:00	15:47:00	Duke	405	Full Bloom	328	0	15	POINT (-123.02126423485038 45.480091106495124)	cinziab	sunny, 66, bumblebees are around
Forest Hills	13	2019-04-29	14:42:00	15:47:00	Duke	405	Full Bloom	328	0	13	POINT (-123.02128630007061 45.480129269940953)	cinziab	sunny, 66, bumblebees are around
Forest Hills	14	2019-04-29	14:42:00	15:47:00	Duke	405	Full Bloom	328	0	12	POINT (-123.02127235643987 45.480171450000277)	cinziab	sunny, 66, bumblebees are around
Forest Hills	15	2019-04-29	14:42:00	15:47:00	Duke	405	Full Bloom	328	0	14	POINT (-123.02128778210033 45.480256031942908)	cinziab	sunny, 66, bumblebees are around
Forest Hills	16	2019-04-29	14:42:00	15:47:00	Duke	405	Full Bloom	328	0	13	POINT (-123.02126190731859 45.480289087874468)	cinziab	sunny, 66, bumblebees are around
Forest Hills	17	2019-04-29	14:42:00	15:47:00	Duke	405	Full Bloom	328	0	14	POINT (-123.02129483718406 45.480332559358565)	cinziab	sunny, 66, bumblebees are around
Forest Hills	18	2019-04-29	14:42:00	15:47:00	Duke	405	Full Bloom	328	0	6	POINT (-123.02128587267585 45.480378085383407)	cinziab	sunny, 66, bumblebees are around
Forest Hills	19	2019-04-29	14:42:00	15:47:00	Duke	405	Full Bloom	328	0	8	POINT (-123.02131201654417 45.480413271107558)	cinziab	sunny, 66, bumblebees are around
Forest Hills	20	2019-04-29	14:42:00	15:47:00	Duke	405	Full Bloom	328	0	13	POINT (-123.02131262652358 45.480453160144165)	cinziab	sunny, 66, bumblebees are around
Forest Hills	21	2019-04-29	14:42:00	15:47:00	Duke	405	Full Bloom	328	0	14	POINT (-123.02118823617955 45.480079732803055)	cinziab	sunny, 66, bumblebees are around
Forest Hills	22	2019-04-29	14:42:00	15:47:00	Duke	405	Full Bloom	328	0	5	POINT (-123.02118283401155 45.480114415540626)	cinziab	sunny, 66, bumblebees are around
Forest Hills	23	2019-04-29	14:42:00	15:47:00	Duke	405	Full Bloom	328	0	1	POINT (-123.02119386669482 45.4801687441515)	cinziab	sunny, 66, bumblebees are around
Forest Hills	24	2019-04-29	14:42:00	15:47:00	Duke	405	Full Bloom	328	0	6	POINT (-123.02119803339207 45.480206084388023)	cinziab	sunny, 66, bumblebees are around
Forest Hills	25	2019-04-29	14:42:00	15:47:00	Duke	405	Full Bloom	328	0	8	POINT (-123.02118435711657 45.480245681003368)	cinziab	sunny, 66, bumblebees are around
Forest Hills	26	2019-04-29	14:42:00	15:47:00	Duke	405	Full Bloom	328	0	4	POINT (-123.02118370457754 45.480327113812045)	cinziab	sunny, 66, bumblebees are around
Forest Hills	27	2019-04-29	14:42:00	15:47:00	Duke	405	Full Bloom	328	0	17	POINT (-123.02118987445796 45.480378410206811)	cinziab	sunny, 66, bumblebees are around
Forest Hills	28	2019-04-29	14:42:00	15:47:00	Duke	405	Full Bloom	328	0	15	POINT (-123.02120221995561 45.480432277626548)	cinziab	sunny, 66, bumblebees are around
Forest Hills	29	2019-04-29	14:42:00	15:47:00	Duke	405	Full Bloom	328	0	21	POINT (-123.02120524157215 45.480475651175027)	cinziab	sunny, 66, bumblebees are around
Forest Hills	30	2019-04-29	14:42:00	15:47:00	Duke	405	Full Bloom	328	0	17	POINT (-123.02120323764851 45.480512770451824)	cinziab	sunny, 66, bumblebees are around
PanAm	1	2019-04-29	09:13:00	14:02:00	Duke	473	25% Bloom	321	0	11	POINT (-122.94559041117134 45.0131096435629)	jeannettek	1pm, 65F, 16 mph winds. this is not continuous, mostly gentle breeze, occasional gusty. Jason said go for it. sunny. if gust occured w count I started the 1 min over. 230pm finish.
PanAm	2	2019-04-29	09:13:00	14:02:00	Duke	473	25% Bloom	321	0	7	POINT (-122.94542519717889 45.01309540000004)	jeannettek	1pm, 65F, 16 mph winds. this is not continuous, mostly gentle breeze, occasional gusty. Jason said go for it. sunny. if gust occured w count I started the 1 min over. 230pm finish.
PanAm	3	2019-04-29	09:13:00	14:02:00	Duke	473	25% Bloom	321	0	6	POINT (-122.94515118372803 45.0130982487129)	jeannettek	1pm, 65F, 16 mph winds. this is not continuous, mostly gentle breeze, occasional gusty. Jason said go for it. sunny. if gust occured w count I started the 1 min over. 230pm finish.
PanAm	4	2019-04-29	09:13:00	14:02:00	Duke	473	25% Bloom	321	0	4	POINT (-122.94489328871548 45.013066912863607)	jeannettek	1pm, 65F, 16 mph winds. this is not continuous, mostly gentle breeze, occasional gusty. Jason said go for it. sunny. if gust occured w count I started the 1 min over. 230pm finish.
PanAm	5	2019-04-29	09:13:00	14:02:00	Duke	473	25% Bloom	321	0	10	POINT (-122.9447522523805 45.013081156433593)	jeannettek	1pm, 65F, 16 mph winds. this is not continuous, mostly gentle breeze, occasional gusty. Jason said go for it. sunny. if gust occured w count I started the 1 min over. 230pm finish.
PanAm	6	2019-04-29	09:13:00	14:02:00	Duke	473	25% Bloom	321	0	5	POINT (-122.94449838697753 45.01303842571302)	jeannettek	1pm, 65F, 16 mph winds. this is not continuous, mostly gentle breeze, occasional gusty. Jason said go for it. sunny. if gust occured w count I started the 1 min over. 230pm finish.
PanAm	7	2019-04-29	09:13:00	14:02:00	Duke	473	25% Bloom	321	0	9	POINT (-122.94429690649895 45.013061215434611)	jeannettek	1pm, 65F, 16 mph winds. this is not continuous, mostly gentle breeze, occasional gusty. Jason said go for it. sunny. if gust occured w count I started the 1 min over. 230pm finish.
PanAm	8	2019-04-29	09:13:00	14:02:00	Duke	473	25% Bloom	321	0	4	POINT (-122.94388185671318 45.013066912863579)	jeannettek	1pm, 65F, 16 mph winds. this is not continuous, mostly gentle breeze, occasional gusty. Jason said go for it. sunny. if gust occured w count I started the 1 min over. 230pm finish.
PanAm	9	2019-04-29	09:13:00	14:02:00	Duke	473	25% Bloom	321	0	6	POINT (-122.94366425779633 45.013021333415828)	jeannettek	1pm, 65F, 16 mph winds. this is not continuous, mostly gentle breeze, occasional gusty. Jason said go for it. sunny. if gust occured w count I started the 1 min over. 230pm finish.
PanAm	10	2019-04-29	09:13:00	14:02:00	Duke	473	25% Bloom	321	0	4	POINT (-122.94348695497521 45.013058366719896)	jeannettek	1pm, 65F, 16 mph winds. this is not continuous, mostly gentle breeze, occasional gusty. Jason said go for it. sunny. if gust occured w count I started the 1 min over. 230pm finish.
PanAm	11	2019-04-29	09:13:00	14:02:00	Duke	473	25% Bloom	321	0	16	POINT (-122.94347298357965 45.012843536361586)	jeannettek	1pm, 65F, 16 mph winds. this is not continuous, mostly gentle breeze, occasional gusty. Jason said go for it. sunny. if gust occured w count I started the 1 min over. 230pm finish.
PanAm	12	2019-04-29	09:13:00	14:02:00	Duke	473	25% Bloom	321	0	3	POINT (-122.94360999030509 45.0128321414586)	jeannettek	1pm, 65F, 16 mph winds. this is not continuous, mostly gentle breeze, occasional gusty. Jason said go for it. sunny. if gust occured w count I started the 1 min over. 230pm finish.
PanAm	13	2019-04-29	09:13:00	14:02:00	Duke	473	25% Bloom	321	4	15	POINT (-122.9439404182899 45.012852082537307)	jeannettek	1pm, 65F, 16 mph winds. this is not continuous, mostly gentle breeze, occasional gusty. Jason said go for it. sunny. if gust occured w count I started the 1 min over. 230pm finish.
PanAm	14	2019-04-29	09:13:00	14:02:00	Duke	473	25% Bloom	321	0	6	POINT (-122.94423055017906 45.012874872333065)	jeannettek	1pm, 65F, 16 mph winds. this is not continuous, mostly gentle breeze, occasional gusty. Jason said go for it. sunny. if gust occured w count I started the 1 min over. 230pm finish.
PanAm	15	2019-04-29	09:13:00	14:02:00	Duke	473	25% Bloom	321	0	17	POINT (-122.94443606026717 45.012872023609084)	jeannettek	1pm, 65F, 16 mph winds. this is not continuous, mostly gentle breeze, occasional gusty. Jason said go for it. sunny. if gust occured w count I started the 1 min over. 230pm finish.
PanAm	16	2019-04-29	09:13:00	14:02:00	Duke	473	25% Bloom	321	0	7	POINT (-122.94456500777345 45.012854931262275)	jeannettek	1pm, 65F, 16 mph winds. this is not continuous, mostly gentle breeze, occasional gusty. Jason said go for it. sunny. if gust occured w count I started the 1 min over. 230pm finish.
PanAm	17	2019-04-29	09:13:00	14:02:00	Duke	473	25% Bloom	321	0	9	POINT (-122.94477454747117 45.012843536361586)	jeannettek	1pm, 65F, 16 mph winds. this is not continuous, mostly gentle breeze, occasional gusty. Jason said go for it. sunny. if gust occured w count I started the 1 min over. 230pm finish.
PanAm	18	2019-04-29	09:13:00	14:02:00	Duke	473	25% Bloom	321	0	3	POINT (-122.94502035365502 45.012863477436369)	jeannettek	1pm, 65F, 16 mph winds. this is not continuous, mostly gentle breeze, occasional gusty. Jason said go for it. sunny. if gust occured w count I started the 1 min over. 230pm finish.
PanAm	19	2019-04-29	09:13:00	14:02:00	Duke	473	25% Bloom	321	0	6	POINT (-122.94527421905799 45.012854931262275)	jeannettek	1pm, 65F, 16 mph winds. this is not continuous, mostly gentle breeze, occasional gusty. Jason said go for it. sunny. if gust occured w count I started the 1 min over. 230pm finish.
PanAm	20	2019-04-29	09:13:00	14:02:00	Duke	473	25% Bloom	321	0	0	POINT (-122.94548778836524 45.012863477436369)	jeannettek	1pm, 65F, 16 mph winds. this is not continuous, mostly gentle breeze, occasional gusty. Jason said go for it. sunny. if gust occured w count I started the 1 min over. 230pm finish.
PanAm	21	2019-04-29	09:13:00	14:02:00	Duke	473	25% Bloom	321	0	4	POINT (-122.94532660398238 45.012484595828475)	jeannettek	1pm, 65F, 16 mph winds. this is not continuous, mostly gentle breeze, occasional gusty. Jason said go for it. sunny. if gust occured w count I started the 1 min over. 230pm finish.
PanAm	22	2019-04-29	09:13:00	14:02:00	Duke	473	25% Bloom	321	0	11	POINT (-122.94513721233254 45.012481747085083)	jeannettek	1pm, 65F, 16 mph winds. this is not continuous, mostly gentle breeze, occasional gusty. Jason said go for it. sunny. if gust occured w count I started the 1 min over. 230pm finish.
PanAm	23	2019-04-29	09:13:00	14:02:00	Duke	473	25% Bloom	321	0	8	POINT (-122.94479066590941 45.012493142057778)	jeannettek	1pm, 65F, 16 mph winds. this is not continuous, mostly gentle breeze, occasional gusty. Jason said go for it. sunny. if gust occured w count I started the 1 min over. 230pm finish.
PanAm	24	2019-04-29	09:13:00	14:02:00	Duke	473	25% Bloom	321	0	12	POINT (-122.9444884451916 45.012495990800609)	jeannettek	1pm, 65F, 16 mph winds. this is not continuous, mostly gentle breeze, occasional gusty. Jason said go for it. sunny. if gust occured w count I started the 1 min over. 230pm finish.
PanAm	25	2019-04-29	09:13:00	14:02:00	Duke	473	25% Bloom	321	0	1	POINT (-122.94412980993977 45.012504537028235)	jeannettek	1pm, 65F, 16 mph winds. this is not continuous, mostly gentle breeze, occasional gusty. Jason said go for it. sunny. if gust occured w count I started the 1 min over. 230pm finish.
PanAm	26	2019-04-29	09:13:00	14:02:00	Duke	473	25% Bloom	321	0	15	POINT (-122.94394847750907 45.01246750336604)	jeannettek	1pm, 65F, 16 mph winds. this is not continuous, mostly gentle breeze, occasional gusty. Jason said go for it. sunny. if gust occured w count I started the 1 min over. 230pm finish.
PanAm	27	2019-04-29	09:13:00	14:02:00	Duke	473	25% Bloom	321	0	4	POINT (-122.94377520429751 45.012490293314848)	jeannettek	1pm, 65F, 16 mph winds. this is not continuous, mostly gentle breeze, occasional gusty. Jason said go for it. sunny. if gust occured w count I started the 1 min over. 230pm finish.
PanAm	28	2019-04-29	09:13:00	14:02:00	Duke	473	25% Bloom	321	0	13	POINT (-122.94364222718167 45.012498839543312)	jeannettek	1pm, 65F, 16 mph winds. this is not continuous, mostly gentle breeze, occasional gusty. Jason said go for it. sunny. if gust occured w count I started the 1 min over. 230pm finish.
PanAm	29	2019-04-29	09:13:00	14:02:00	Duke	473	25% Bloom	321	0	3	POINT (-122.94356163499026 45.012495990800659)	jeannettek	1pm, 65F, 16 mph winds. this is not continuous, mostly gentle breeze, occasional gusty. Jason said go for it. sunny. if gust occured w count I started the 1 min over. 230pm finish.
PanAm	30	2019-04-29	09:13:00	14:02:00	Duke	473	25% Bloom	321	0	11	POINT (-122.94348104279884 45.012461805877479)	jeannettek	1pm, 65F, 16 mph winds. this is not continuous, mostly gentle breeze, occasional gusty. Jason said go for it. sunny. if gust occured w count I started the 1 min over. 230pm finish.
Verboort	5	2019-04-26	10:36:00	13:58:00	Liberty	1011	25% Bloom	308		5	POINT (-123.0787508132875 45.547957524387137)	angiem	late pink bud with 10 to 30% bloom, moderate bee activity, same low incidence leaf spotting as field 1010
Verboort	6	2019-04-26	10:36:00	13:58:00	Liberty	1011	25% Bloom	308		1	POINT (-123.07889641139752 45.547955582403375)	angiem	late pink bud with 10 to 30% bloom, moderate bee activity, same low incidence leaf spotting as field 1010
Verboort	7	2019-04-26	10:36:00	13:58:00	Liberty	1011	25% Bloom	308		7	POINT (-123.0792024621732 45.547973539431126)	angiem	late pink bud with 10 to 30% bloom, moderate bee activity, same low incidence leaf spotting as field 1010
Verboort	8	2019-04-26	10:36:00	13:58:00	Liberty	1011	25% Bloom	308		0	POINT (-123.07956284123891 45.547965937409245)	angiem	late pink bud with 10 to 30% bloom, moderate bee activity, same low incidence leaf spotting as field 1010
Verboort	9	2019-04-26	10:36:00	13:58:00	Liberty	1011	25% Bloom	308		0	POINT (-123.07980662709518 45.547952326997134)	angiem	late pink bud with 10 to 30% bloom, moderate bee activity, same low incidence leaf spotting as field 1010
Verboort	10	2019-04-26	10:36:00	13:58:00	Liberty	1011	25% Bloom	308		0	POINT (-123.08006585087908 45.54798908783799)	angiem	late pink bud with 10 to 30% bloom, moderate bee activity, same low incidence leaf spotting as field 1010
Verboort	11	2019-04-26	10:36:00	13:58:00	Liberty	1011	25% Bloom	308		1	POINT (-123.08027235886169 45.547972794018492)	angiem	late pink bud with 10 to 30% bloom, moderate bee activity, same low incidence leaf spotting as field 1010
Verboort	12	2019-04-26	10:36:00	13:58:00	Liberty	1011	25% Bloom	308		2	POINT (-123.08070819380542 45.547992595799535)	angiem	late pink bud with 10 to 30% bloom, moderate bee activity, same low incidence leaf spotting as field 1010
Verboort	13	2019-04-26	10:36:00	13:58:00	Liberty	1011	25% Bloom	308		1	POINT (-123.08106943792552 45.547960096758445)	angiem	late pink bud with 10 to 30% bloom, moderate bee activity, same low incidence leaf spotting as field 1010
Verboort	14	2019-04-26	10:36:00	13:58:00	Liberty	1011	25% Bloom	308		3	POINT (-123.08135781876983 45.548002259965543)	angiem	late pink bud with 10 to 30% bloom, moderate bee activity, same low incidence leaf spotting as field 1010
Verboort	1	2019-04-26	14:05:00	14:47:00	Liberty	1011	25% Bloom	312		1	POINT (-123.08202263328037 45.547951854058958)	angiem	created new events as map points were too crowded, map function finicky. only 4 videos for both pollinator fields as all bee boxes were placed north of fields
Verboort	2	2019-04-26	14:05:00	14:47:00	Liberty	1011	25% Bloom	312		1	POINT (-123.0818403986938 45.547920457559314)	angiem	created new events as map points were too crowded, map function finicky. only 4 videos for both pollinator fields as all bee boxes were placed north of fields
Verboort	3	2019-04-26	14:05:00	14:47:00	Liberty	1011	25% Bloom	312		1	POINT (-123.0814603756511 45.547941005980149)	angiem	created new events as map points were too crowded, map function finicky. only 4 videos for both pollinator fields as all bee boxes were placed north of fields
Verboort	4	2019-04-26	14:05:00	14:47:00	Liberty	1011	25% Bloom	312		0	POINT (-123.08134656214879 45.547930519570961)	angiem	created new events as map points were too crowded, map function finicky. only 4 videos for both pollinator fields as all bee boxes were placed north of fields
Verboort	5	2019-04-26	14:05:00	14:47:00	Liberty	1011	25% Bloom	312		1	POINT (-123.08098468919522 45.547955425744895)	angiem	created new events as map points were too crowded, map function finicky. only 4 videos for both pollinator fields as all bee boxes were placed north of fields
Verboort	6	2019-04-26	14:05:00	14:47:00	Liberty	1011	25% Bloom	312		2	POINT (-123.08061812165357 45.5479459868373)	angiem	created new events as map points were too crowded, map function finicky. only 4 videos for both pollinator fields as all bee boxes were placed north of fields
Verboort	7	2019-04-26	14:05:00	14:47:00	Liberty	1011	25% Bloom	312		0	POINT (-123.08021311843829 45.547947253895096)	angiem	created new events as map points were too crowded, map function finicky. only 4 videos for both pollinator fields as all bee boxes were placed north of fields
Verboort	8	2019-04-26	14:05:00	14:47:00	Liberty	1011	25% Bloom	312		1	POINT (-123.07980177039042 45.5479491319091)	angiem	created new events as map points were too crowded, map function finicky. only 4 videos for both pollinator fields as all bee boxes were placed north of fields
Verboort	9	2019-04-26	14:05:00	14:47:00	Liberty	1011	25% Bloom	312		1	POINT (-123.07957042316509 45.547926232941748)	angiem	created new events as map points were too crowded, map function finicky. only 4 videos for both pollinator fields as all bee boxes were placed north of fields
Verboort	10	2019-04-26	14:05:00	14:47:00	Liberty	1011	25% Bloom	312		1	POINT (-123.07914328156171 45.547941651774934)	angiem	created new events as map points were too crowded, map function finicky. only 4 videos for both pollinator fields as all bee boxes were placed north of fields
Verboort	1	2019-04-26	14:51:00	15:05:00	Liberty	1011	25% Bloom	313		0	POINT (-123.07877892362279 45.547778716537017)	angiem
Verboort	2	2019-04-26	14:51:00	15:05:00	Liberty	1011	25% Bloom	313		0	POINT (-123.07887542888815 45.547793831566494)	angiem
Verboort	3	2019-04-26	14:51:00	15:05:00	Liberty	1011	25% Bloom	313		0	POINT (-123.07919969908451 45.547847217290126)	angiem
Verboort	4	2019-04-26	14:51:00	15:05:00	Liberty	1011	25% Bloom	313		0	POINT (-123.07939312034394 45.547841573310762)	angiem
Verboort	5	2019-04-26	14:51:00	15:05:00	Liberty	1011	25% Bloom	313		0	POINT (-123.07960668965121 45.547830285350344)	angiem
Verboort	6	2019-04-26	14:51:00	15:05:00	Liberty	1011	25% Bloom	313		0	POINT (-123.07996532490303 45.547824641369246)	angiem
Verboort	7	2019-04-26	14:51:00	15:05:00	Liberty	1011	25% Bloom	313		0	POINT (-123.08015068694331 45.547875437178448)	angiem
Verboort	8	2019-04-26	14:51:00	15:05:00	Liberty	1011	25% Bloom	313		4	POINT (-123.08053349985255 45.547858505247163)	angiem
Verboort	9	2019-04-26	14:51:00	15:05:00	Liberty	1011	25% Bloom	313		0	POINT (-123.0809767569054 45.547886725129828)	angiem
Verboort	10	2019-04-26	14:51:00	15:05:00	Liberty	1011	25% Bloom	313		0	POINT (-123.08140389551993 45.547895191091861)	angiem
Verboort	1	2019-04-26	15:09:00	15:25:00	Duke	1012	25% Bloom	314		8	POINT (-123.08193433336662 45.547633732043714)	angiem
Verboort	2	2019-04-26	15:09:00	15:25:00	Duke	1012	25% Bloom	314		5	POINT (-123.08176678199666 45.547641001456718)	angiem
Verboort	3	2019-04-26	15:09:00	15:25:00	Duke	1012	25% Bloom	314		3	POINT (-123.08158282345406 45.5476883311358)	angiem
Verboort	4	2019-04-26	15:09:00	15:25:00	Duke	1012	25% Bloom	314		1	POINT (-123.08139161520448 45.547662548177996)	angiem
Verboort	5	2019-04-26	15:09:00	15:25:00	Duke	1012	25% Bloom	314		3	POINT (-123.08107836194507 45.547682345728951)	angiem
Verboort	6	2019-04-26	15:09:00	15:25:00	Duke	1012	25% Bloom	314		2	POINT (-123.08063148629192 45.547704423003005)	angiem
Verboort	7	2019-04-26	15:09:00	15:25:00	Duke	1012	25% Bloom	314		1	POINT (-123.08032959636942 45.547648475200191)	angiem
Verboort	8	2019-04-26	15:09:00	15:25:00	Duke	1012	25% Bloom	314		0	POINT (-123.08017593542007 45.54765853490364)	angiem
Verboort	9	2019-04-26	15:09:00	15:25:00	Duke	1012	25% Bloom	314		6	POINT (-123.0798213297778 45.547655712904572)	angiem
Verboort	10	2019-04-26	15:09:00	15:25:00	Duke	1012	25% Bloom	314		4	POINT (-123.07935389506754 45.547661356902616)	angiem
Verboort	1	2019-04-26	15:31:00	15:48:00	Duke	1012	Full Bloom	315		0	POINT (-123.07889048996688 45.547548476834343)	angiem
Verboort	2	2019-04-26	15:31:00	15:48:00	Duke	1012	Full Bloom	315		5	POINT (-123.0791645034177 45.547523078787755)	angiem
Verboort	3	2019-04-26	15:31:00	15:48:00	Duke	1012	Full Bloom	315		0	POINT (-123.07949896101213 45.547517434775862)	angiem
Verboort	4	2019-04-26	15:31:00	15:48:00	Duke	1012	Full Bloom	315		7	POINT (-123.07975282641512 45.547525900793516)	angiem
Verboort	5	2019-04-26	15:31:00	15:48:00	Duke	1012	Full Bloom	315		0	POINT (-123.08025249800193 45.547525900793516)	angiem
Verboort	6	2019-04-26	15:31:00	15:48:00	Duke	1012	Full Bloom	315		9	POINT (-123.08070381427387 45.547556942847315)	angiem
Verboort	7	2019-04-26	15:31:00	15:48:00	Duke	1012	Full Bloom	315		2	POINT (-123.08088111709503 45.547554120843152)	angiem
Verboort	8	2019-04-26	15:31:00	15:48:00	Duke	1012	Full Bloom	315		6	POINT (-123.08118333781285 45.547545654829754)	angiem
Verboort	9	2019-04-26	15:31:00	15:48:00	Duke	1012	Full Bloom	315		0	POINT (-123.08150570657854 45.547573874869492)	angiem
Verboort	10	2019-04-26	15:31:00	15:48:00	Duke	1012	Full Bloom	315		2	POINT (-123.08186267179194 45.547537962836316)	angiem
Verboort	1	2019-04-26	15:50:00	16:08:00	Duke	1012	Full Bloom	316		0	POINT (-123.08197643359067 45.547392550867066)	angiem
Verboort	2	2019-04-26	15:50:00	16:08:00	Duke	1012	Full Bloom	316		3	POINT (-123.08176933732481 45.547450036079255)	angiem
Verboort	3	2019-04-26	15:50:00	16:08:00	Duke	1012	Full Bloom	316		0	POINT (-123.08138884790098 45.547427130508176)	angiem
Verboort	4	2019-04-26	15:50:00	16:08:00	Duke	1012	Full Bloom	316		0	POINT (-123.08102215342998 45.547444062569433)	angiem
Verboort	5	2019-04-26	15:50:00	16:08:00	Duke	1012	Full Bloom	316		0	POINT (-123.08071993271217 45.547427130508176)	angiem
Verboort	6	2019-04-26	15:50:00	16:08:00	Duke	1012	Full Bloom	316		1	POINT (-123.08039466178175 45.547415052408212)	angiem
Verboort	7	2019-04-26	15:50:00	16:08:00	Duke	1012	Full Bloom	316		0	POINT (-123.07996236611281 45.547438418549582)	angiem
Verboort	8	2019-04-26	15:50:00	16:08:00	Duke	1012	Full Bloom	316		1	POINT (-123.07958411090601 45.54739761663236)	angiem
Verboort	9	2019-04-26	15:50:00	16:08:00	Duke	1012	Full Bloom	316		0	POINT (-123.07925296313846 45.54738945937499)	angiem
Verboort	10	2019-04-26	15:50:00	16:08:00	Duke	1012	Full Bloom	316		0	POINT (-123.07907127188078 45.547399011260524)	angiem
PanAm	1	2019-04-22	14:47:00	15:29:00	Duke	473	25% Bloom	243		3	POINT (-122.94351326602268 45.012485723743666)	angiem	65 degrees, 14 47pm, 4mph, overcast, 2nd aisle working with janette
PanAm	2	2019-04-22	14:47:00	15:29:00	Duke	473	25% Bloom	243		10	POINT (-122.94361468662368 45.012479549219456)	angiem
PanAm	3	2019-04-22	14:47:00	15:29:00	Duke	473	25% Bloom	243		9	POINT (-122.94367248624981 45.012487977299763)	angiem
PanAm	4	2019-04-22	14:47:00	15:29:00	Duke	473	25% Bloom	243		7	POINT (-122.94377520429749 45.012484595828475)	angiem
PanAm	5	2019-04-22	14:47:00	15:29:00	Duke	473	25% Bloom	243		4	POINT (-122.94397997530376 45.012488725664504)	angiem
PanAm	6	2019-04-22	14:47:00	15:29:00	Duke	473	25% Bloom	243		4	POINT (-122.94415500085132 45.012487370426925)	angiem
PanAm	7	2019-04-22	14:47:00	15:29:00	Duke	473	25% Bloom	243		4	POINT (-122.94447563721386 45.0124942759699)	angiem
PanAm	8	2019-04-22	14:47:00	15:29:00	Duke	473	25% Bloom	243		1	POINT (-122.94478107816899 45.012493074191028)	angiem
PanAm	9	2019-04-22	14:47:00	15:29:00	Duke	473	25% Bloom	243		0	POINT (-122.9450726011839 45.012510166075437)	angiem
PanAm	10	2019-04-22	14:47:00	15:29:00	Duke	473	25% Bloom	243		3	POINT (-122.94539913695466 45.012510234512604)	angiem
PanAm	1	2019-04-22	19:17:00	19:21:00	Duke	473	First Bloom	244		4	POINT (-122.94348410295396 45.012771908931931)	jeannettek	I recreated this event bc ag report wouldn't sync it, some data upload problem, so GPS markers are in the approximate area but probably offs bit. 65F, started 14:47, 4MPH wind, completely cloudy.
PanAm	2	2019-04-22	19:17:00	19:21:00	Duke	473	First Bloom	244		6	POINT (-122.94366540727508 45.012787930546459)	jeannettek	I recreated this event bc ag report wouldn't sync it, some data upload problem, so GPS markers are in the approximate area but probably offs bit. 65F, started 14:47, 4MPH wind, completely cloudy.
PanAm	3	2019-04-22	19:17:00	19:21:00	Duke	473	First Bloom	244		5	POINT (-122.94388750506845 45.012778317578274)	jeannettek	I recreated this event bc ag report wouldn't sync it, some data upload problem, so GPS markers are in the approximate area but probably offs bit. 65F, started 14:47, 4MPH wind, completely cloudy.
PanAm	4	2019-04-22	19:17:00	19:21:00	Duke	473	First Bloom	244		3	POINT (-122.94407787460561 45.012765500284857)	jeannettek	I recreated this event bc ag report wouldn't sync it, some data upload problem, so GPS markers are in the approximate area but probably offs bit. 65F, started 14:47, 4MPH wind, completely cloudy.
PanAm	5	2019-04-22	19:17:00	19:21:00	Duke	473	First Bloom	244		5	POINT (-122.9443181028311 45.012775113255209)	jeannettek	I recreated this event bc ag report wouldn't sync it, some data upload problem, so GPS markers are in the approximate area but probably offs bit. 65F, started 14:47, 4MPH wind, completely cloudy.
PanAm	6	2019-04-22	19:17:00	19:21:00	Duke	473	First Bloom	244		9	POINT (-122.9445628636646 45.012787930546459)	jeannettek	I recreated this event bc ag report wouldn't sync it, some data upload problem, so GPS markers are in the approximate area but probably offs bit. 65F, started 14:47, 4MPH wind, completely cloudy.
PanAm	7	2019-04-22	19:17:00	19:21:00	Duke	473	First Bloom	244		15	POINT (-122.94487561361855 45.012768704608483)	jeannettek	I recreated this event bc ag report wouldn't sync it, some data upload problem, so GPS markers are in the approximate area but probably offs bit. 65F, started 14:47, 4MPH wind, completely cloudy.
PanAm	8	2019-04-22	19:17:00	19:21:00	Duke	473	First Bloom	244		10	POINT (-122.94513397227614 45.012759091637093)	jeannettek	I recreated this event bc ag report wouldn't sync it, some data upload problem, so GPS markers are in the approximate area but probably offs bit. 65F, started 14:47, 4MPH wind, completely cloudy.
PanAm	9	2019-04-22	19:17:00	19:21:00	Duke	473	First Bloom	244		10	POINT (-122.94537873310965 45.012781521901168)	jeannettek	I recreated this event bc ag report wouldn't sync it, some data upload problem, so GPS markers are in the approximate area but probably offs bit. 65F, started 14:47, 4MPH wind, completely cloudy.
PanAm	10	2019-04-22	19:17:00	19:21:00	Duke	473	First Bloom	244		3	POINT (-122.94562349394317 45.012797543513024)	jeannettek	I recreated this event bc ag report wouldn't sync it, some data upload problem, so GPS markers are in the approximate area but probably offs bit. 65F, started 14:47, 4MPH wind, completely cloudy.
PanAm	11	2019-04-22	19:17:00	19:21:00	Duke	473	First Bloom	244		9	POINT (-122.94352406735663 45.013014046412849)	jeannettek	I recreated this event bc ag report wouldn't sync it, some data upload problem, so GPS markers are in the approximate area but probably offs bit. 65F, started 14:47, 4MPH wind, completely cloudy.
PanAm	12	2019-04-22	19:17:00	19:21:00	Duke	473	First Bloom	244		14	POINT (-122.94372957744474 45.013033987428223)	jeannettek	I recreated this event bc ag report wouldn't sync it, some data upload problem, so GPS markers are in the approximate area but probably offs bit. 65F, started 14:47, 4MPH wind, completely cloudy.
PanAm	13	2019-04-22	19:17:00	19:21:00	Duke	473	First Bloom	244		13	POINT (-122.94396732440946 45.0130539284367)	jeannettek	I recreated this event bc ag report wouldn't sync it, some data upload problem, so GPS markers are in the approximate area but probably offs bit. 65F, started 14:47, 4MPH wind, completely cloudy.
PanAm	14	2019-04-22	19:17:00	19:21:00	Duke	473	First Bloom	244		7	POINT (-122.94414865684014 45.0130539284367)	jeannettek	I recreated this event bc ag report wouldn't sync it, some data upload problem, so GPS markers are in the approximate area but probably offs bit. 65F, started 14:47, 4MPH wind, completely cloudy.
PanAm	15	2019-04-22	19:17:00	19:21:00	Duke	473	First Bloom	244		7	POINT (-122.94445490716754 45.013062474581041)	jeannettek	I recreated this event bc ag report wouldn't sync it, some data upload problem, so GPS markers are in the approximate area but probably offs bit. 65F, started 14:47, 4MPH wind, completely cloudy.
PanAm	16	2019-04-22	19:17:00	19:21:00	Duke	473	First Bloom	244		10	POINT (-122.94472086139926 45.013045382291047)	jeannettek	I recreated this event bc ag report wouldn't sync it, some data upload problem, so GPS markers are in the approximate area but probably offs bit. 65F, started 14:47, 4MPH wind, completely cloudy.
PanAm	17	2019-04-22	19:17:00	19:21:00	Duke	473	First Bloom	244		7	POINT (-122.94495457875438 45.01305107972162)	jeannettek	I recreated this event bc ag report wouldn't sync it, some data upload problem, so GPS markers are in the approximate area but probably offs bit. 65F, started 14:47, 4MPH wind, completely cloudy.
PanAm	18	2019-04-22	19:17:00	19:21:00	Duke	473	First Bloom	244		6	POINT (-122.94521650337651 45.013073869438195)	jeannettek	I recreated this event bc ag report wouldn't sync it, some data upload problem, so GPS markers are in the approximate area but probably offs bit. 65F, started 14:47, 4MPH wind, completely cloudy.
PanAm	19	2019-04-22	19:17:00	19:21:00	Duke	473	First Bloom	244		6	POINT (-122.9454542503412 45.013099507858492)	jeannettek	I recreated this event bc ag report wouldn't sync it, some data upload problem, so GPS markers are in the approximate area but probably offs bit. 65F, started 14:47, 4MPH wind, completely cloudy.
PanAm	20	2019-04-22	19:17:00	19:21:00	Duke	473	First Bloom	244		12	POINT (-122.94561946433362 45.013088113006454)	jeannettek	I recreated this event bc ag report wouldn't sync it, some data upload problem, so GPS markers are in the approximate area but probably offs bit. 65F, started 14:47, 4MPH wind, completely cloudy.
PanAm	1	2019-04-18	10:08:00	11:42:00	Duke	473	First Bloom	203		0	POINT (-122.94415801720675 45.0127922592803)	Joshr	pollinator study
PanAm	2	2019-04-18	10:08:00	11:42:00	Duke	473	First Bloom	203		2	POINT (-122.94415801720675 45.0127922592803)	Joshr	pollinator study
PanAm	3	2019-04-18	10:08:00	11:42:00	Duke	473	First Bloom	203		5	POINT (-122.94415801720675 45.0127922592803)	Joshr	pollinator study
PanAm	4	2019-04-18	10:08:00	11:42:00	Duke	473	First Bloom	203		0	POINT (-122.94415801720675 45.0127922592803)	Joshr	pollinator study
PanAm	5	2019-04-18	10:08:00	11:42:00	Duke	473	First Bloom	203		1	POINT (-122.94415801720675 45.0127922592803)	Joshr	pollinator study
PanAm	6	2019-04-18	10:08:00	11:42:00	Duke	473	First Bloom	203		4	POINT (-122.94415801720675 45.0127922592803)	Joshr	pollinator study
PanAm	7	2019-04-18	10:08:00	11:42:00	Duke	473	First Bloom	203		4	POINT (-122.94415801720675 45.0127922592803)	Joshr	pollinator study
PanAm	8	2019-04-18	10:08:00	11:42:00	Duke	473	First Bloom	203		4	POINT (-122.94415801720675 45.0127922592803)	Joshr	pollinator study
PanAm	9	2019-04-18	10:08:00	11:42:00	Duke	473	First Bloom	203		2	POINT (-122.94415801720675 45.0127922592803)	Joshr	pollinator study
PanAm	10	2019-04-18	10:08:00	11:42:00	Duke	473	First Bloom	203		13	POINT (-122.94415801720675 45.0127922592803)	Joshr	pollinator study
PanAm	11	2019-04-18	10:08:00	11:42:00	Duke	473	First Bloom	203		10	POINT (-122.94415801720675 45.0127922592803)	Joshr	pollinator study
PanAm	12	2019-04-18	10:08:00	11:42:00	Duke	473	First Bloom	203		2	POINT (-122.94415801720675 45.0127922592803)	Joshr	pollinator study
PanAm	13	2019-04-18	10:08:00	11:42:00	Duke	473	First Bloom	203		2	POINT (-122.94415801720675 45.0127922592803)	Joshr	pollinator study
PanAm	14	2019-04-18	10:08:00	11:42:00	Duke	473	First Bloom	203		0	POINT (-122.94415801720675 45.0127922592803)	Joshr	pollinator study
PanAm	15	2019-04-18	10:08:00	11:42:00	Duke	473	First Bloom	203		9	POINT (-122.94415801720675 45.0127922592803)	Joshr	pollinator study
PanAm	16	2019-04-18	10:08:00	11:42:00	Duke	473	First Bloom	203		2	POINT (-122.94415801720675 45.0127922592803)	Joshr	pollinator study
PanAm	17	2019-04-18	10:08:00	11:42:00	Duke	473	First Bloom	203		0	POINT (-122.94415801720675 45.0127922592803)	Joshr	pollinator study
PanAm	18	2019-04-18	10:08:00	11:42:00	Duke	473	First Bloom	203		3	POINT (-122.94415801720675 45.0127922592803)	Joshr	pollinator study
PanAm	19	2019-04-18	10:08:00	11:42:00	Duke	473	First Bloom	203		4	POINT (-122.94415801720675 45.0127922592803)	Joshr	pollinator study
PanAm	20	2019-04-18	10:08:00	11:42:00	Duke	473	First Bloom	203		2	POINT (-122.94415801720675 45.0127922592803)	Joshr	pollinator study
PanAm	21	2019-04-18	10:08:00	11:42:00	Duke	473	First Bloom	203		6	POINT (-122.94415801720675 45.0127922592803)	Joshr	pollinator study
PanAm	22	2019-04-18	10:08:00	11:42:00	Duke	473	First Bloom	203		1	POINT (-122.94415801720675 45.0127922592803)	Joshr	pollinator study
PanAm	23	2019-04-18	10:08:00	11:42:00	Duke	473	First Bloom	203		2	POINT (-122.94415801720675 45.0127922592803)	Joshr	pollinator study
PanAm	24	2019-04-18	10:08:00	11:42:00	Duke	473	First Bloom	203		1	POINT (-122.94415801720675 45.0127922592803)	Joshr	pollinator study
PanAm	25	2019-04-18	10:08:00	11:42:00	Duke	473	First Bloom	203		0	POINT (-122.94415801720675 45.0127922592803)	Joshr	pollinator study
PanAm	26	2019-04-18	10:08:00	11:42:00	Duke	473	First Bloom	203		0	POINT (-122.94415801720675 45.0127922592803)	Joshr	pollinator study
PanAm	27	2019-04-18	10:08:00	11:42:00	Duke	473	First Bloom	203		0	POINT (-122.94415801720675 45.0127922592803)	Joshr	pollinator study
PanAm	28	2019-04-18	10:08:00	11:42:00	Duke	473	First Bloom	203		3	POINT (-122.94415801720675 45.0127922592803)	Joshr	pollinator study
PanAm	29	2019-04-18	10:08:00	11:42:00	Duke	473	First Bloom	203		0	POINT (-122.94415801720675 45.0127922592803)	Joshr	pollinator study
PanAm	30	2019-04-18	10:08:00	11:42:00	Duke	473	First Bloom	203		4	POINT (-122.94415801720675 45.0127922592803)	Joshr	pollinator study
Five Oaks	1	2019-04-18	14:17:00	14:17:00	Duke	983	First Bloom	205		6	POINT (-122.91088838771051 45.023026108626979)	Joshr	pollination study
Five Oaks	2	2019-04-18	14:17:00	14:17:00	Duke	983	First Bloom	205		4	POINT (-122.91088838771051 45.023026108626979)	Joshr	pollination study
Five Oaks	3	2019-04-18	14:17:00	14:17:00	Duke	983	First Bloom	205		12	POINT (-122.91088838771051 45.023026108626979)	Joshr	pollination study
Five Oaks	4	2019-04-18	14:17:00	14:17:00	Duke	983	First Bloom	205		15	POINT (-122.91088838771051 45.023026108626979)	Joshr	pollination study
Five Oaks	5	2019-04-18	14:17:00	14:17:00	Duke	983	First Bloom	205		20	POINT (-122.91088838771051 45.023026108626979)	Joshr	pollination study
Five Oaks	6	2019-04-18	14:17:00	14:17:00	Duke	983	First Bloom	205		2	POINT (-122.91088838771051 45.023026108626979)	Joshr	pollination study
Five Oaks	7	2019-04-18	14:17:00	14:17:00	Duke	983	First Bloom	205		8	POINT (-122.91088838771051 45.023026108626979)	Joshr	pollination study
Five Oaks	8	2019-04-18	14:17:00	14:17:00	Duke	983	First Bloom	205		4	POINT (-122.91088838771051 45.023026108626979)	Joshr	pollination study
Five Oaks	9	2019-04-18	14:17:00	14:17:00	Duke	983	First Bloom	205		10	POINT (-122.91088838771051 45.023026108626979)	Joshr	pollination study
Five Oaks	10	2019-04-18	14:17:00	14:17:00	Duke	983	First Bloom	205		6	POINT (-122.91088838771051 45.023026108626979)	Joshr	pollination study
Five Oaks	11	2019-04-18	14:17:00	14:17:00	Duke	983	First Bloom	205		3	POINT (-122.91088838771051 45.023026108626979)	Joshr	pollination study
Five Oaks	12	2019-04-18	14:17:00	14:17:00	Duke	983	First Bloom	205		2	POINT (-122.91088838771051 45.023026108626979)	Joshr	pollination study
Five Oaks	13	2019-04-18	14:17:00	14:17:00	Duke	983	First Bloom	205		3	POINT (-122.91088838771051 45.023026108626979)	Joshr	pollination study
Five Oaks	14	2019-04-18	14:17:00	14:17:00	Duke	983	First Bloom	205		1	POINT (-122.91088838771051 45.023026108626979)	Joshr	pollination study
Five Oaks	15	2019-04-18	14:17:00	14:17:00	Duke	983	First Bloom	205		5	POINT (-122.91088838771051 45.023026108626979)	Joshr	pollination study
Five Oaks	16	2019-04-18	14:17:00	14:17:00	Duke	983	First Bloom	205		6	POINT (-122.91088838771051 45.023026108626979)	Joshr	pollination study
Five Oaks	17	2019-04-18	14:17:00	14:17:00	Duke	983	First Bloom	205		2	POINT (-122.91088838771051 45.023026108626979)	Joshr	pollination study
Five Oaks	18	2019-04-18	14:17:00	14:17:00	Duke	983	First Bloom	205		0	POINT (-122.91088838771051 45.023026108626979)	Joshr	pollination study
Five Oaks	19	2019-04-18	14:17:00	14:17:00	Duke	983	First Bloom	205		1	POINT (-122.91088838771051 45.023026108626979)	Joshr	pollination study
Five Oaks	20	2019-04-18	14:17:00	14:17:00	Duke	983	First Bloom	205		0	POINT (-122.91088838771051 45.023026108626979)	Joshr	pollination study
Five Oaks	21	2019-04-18	14:17:00	14:17:00	Duke	983	First Bloom	205		7	POINT (-122.91088838771051 45.023026108626979)	Joshr	pollination study
Five Oaks	22	2019-04-18	14:17:00	14:17:00	Duke	983	First Bloom	205		3	POINT (-122.91088838771051 45.023026108626979)	Joshr	pollination study
Five Oaks	23	2019-04-18	14:17:00	14:17:00	Duke	983	First Bloom	205		0	POINT (-122.91088838771051 45.023026108626979)	Joshr	pollination study
Five Oaks	24	2019-04-18	14:17:00	14:17:00	Duke	983	First Bloom	205		8	POINT (-122.91088838771051 45.023026108626979)	Joshr	pollination study
Five Oaks	25	2019-04-18	14:17:00	14:17:00	Duke	983	First Bloom	205		1	POINT (-122.91088838771051 45.023026108626979)	Joshr	pollination study
Five Oaks	26	2019-04-18	14:17:00	14:17:00	Duke	983	First Bloom	205		17	POINT (-122.91088838771051 45.023026108626979)	Joshr	pollination study
Five Oaks	27	2019-04-18	14:17:00	14:17:00	Duke	983	First Bloom	205		6	POINT (-122.91088838771051 45.023026108626979)	Joshr	pollination study
Five Oaks	28	2019-04-18	14:17:00	14:17:00	Duke	983	First Bloom	205		21	POINT (-122.91088838771051 45.023026108626979)	Joshr	pollination study
Five Oaks	29	2019-04-18	14:17:00	14:17:00	Duke	983	First Bloom	205		3	POINT (-122.91088838771051 45.023026108626979)	Joshr	pollination study
Five Oaks	30	2019-04-18	14:17:00	14:17:00	Duke	983	First Bloom	205		24	POINT (-122.91088838771051 45.023026108626979)	Joshr	pollination study
Five Oaks	1	2019-04-18	12:55:00	13:50:00	Duke	984	First Bloom	204		0	POINT (-122.89871961923771 45.010359030428091)	Joshr	pollinator study ****NO OPEN BUDS IN THE NEAR SITES****
Five Oaks	2	2019-04-18	12:55:00	13:50:00	Duke	984	First Bloom	204		0	POINT (-122.89871961923771 45.010359030428091)	Joshr	pollinator study ****NO OPEN BUDS IN THE NEAR SITES****
Five Oaks	3	2019-04-18	12:55:00	13:50:00	Duke	984	First Bloom	204		0	POINT (-122.89871961923771 45.010359030428091)	Joshr	pollinator study ****NO OPEN BUDS IN THE NEAR SITES****
Five Oaks	4	2019-04-18	12:55:00	13:50:00	Duke	984	First Bloom	204		0	POINT (-122.89871961923771 45.010359030428091)	Joshr	pollinator study ****NO OPEN BUDS IN THE NEAR SITES****
Five Oaks	5	2019-04-18	12:55:00	13:50:00	Duke	984	First Bloom	204		0	POINT (-122.89871961923771 45.010359030428091)	Joshr	pollinator study ****NO OPEN BUDS IN THE NEAR SITES****
Five Oaks	6	2019-04-18	12:55:00	13:50:00	Duke	984	First Bloom	204		0	POINT (-122.89871961923771 45.010359030428091)	Joshr	pollinator study ****NO OPEN BUDS IN THE NEAR SITES****
Five Oaks	7	2019-04-18	12:55:00	13:50:00	Duke	984	First Bloom	204		0	POINT (-122.89871961923771 45.010359030428091)	Joshr	pollinator study ****NO OPEN BUDS IN THE NEAR SITES****
Five Oaks	8	2019-04-18	12:55:00	13:50:00	Duke	984	First Bloom	204		0	POINT (-122.89871961923771 45.010359030428091)	Joshr	pollinator study ****NO OPEN BUDS IN THE NEAR SITES****
Five Oaks	9	2019-04-18	12:55:00	13:50:00	Duke	984	First Bloom	204		0	POINT (-122.89871961923771 45.010359030428091)	Joshr	pollinator study ****NO OPEN BUDS IN THE NEAR SITES****
Five Oaks	10	2019-04-18	12:55:00	13:50:00	Duke	984	First Bloom	204		0	POINT (-122.89871961923771 45.010359030428091)	Joshr	pollinator study ****NO OPEN BUDS IN THE NEAR SITES****
Five Oaks	11	2019-04-18	12:55:00	13:50:00	Duke	984	First Bloom	204		7	POINT (-122.89871961923771 45.010359030428091)	Joshr	pollinator study ****NO OPEN BUDS IN THE NEAR SITES****
Five Oaks	12	2019-04-18	12:55:00	13:50:00	Duke	984	First Bloom	204		1	POINT (-122.89871961923771 45.010359030428091)	Joshr	pollinator study ****NO OPEN BUDS IN THE NEAR SITES****
Five Oaks	13	2019-04-18	12:55:00	13:50:00	Duke	984	First Bloom	204		0	POINT (-122.89871961923771 45.010359030428091)	Joshr	pollinator study ****NO OPEN BUDS IN THE NEAR SITES****
Five Oaks	14	2019-04-18	12:55:00	13:50:00	Duke	984	First Bloom	204		2	POINT (-122.89871961923771 45.010359030428091)	Joshr	pollinator study ****NO OPEN BUDS IN THE NEAR SITES****
Five Oaks	15	2019-04-18	12:55:00	13:50:00	Duke	984	First Bloom	204		4	POINT (-122.89871961923771 45.010359030428091)	Joshr	pollinator study ****NO OPEN BUDS IN THE NEAR SITES****
Five Oaks	16	2019-04-18	12:55:00	13:50:00	Duke	984	First Bloom	204		0	POINT (-122.89871961923771 45.010359030428091)	Joshr	pollinator study ****NO OPEN BUDS IN THE NEAR SITES****
Five Oaks	17	2019-04-18	12:55:00	13:50:00	Duke	984	First Bloom	204		5	POINT (-122.89871961923771 45.010359030428091)	Joshr	pollinator study ****NO OPEN BUDS IN THE NEAR SITES****
Five Oaks	18	2019-04-18	12:55:00	13:50:00	Duke	984	First Bloom	204		9	POINT (-122.89871961923771 45.010359030428091)	Joshr	pollinator study ****NO OPEN BUDS IN THE NEAR SITES****
Five Oaks	19	2019-04-18	12:55:00	13:50:00	Duke	984	First Bloom	204		1	POINT (-122.89871961923771 45.010359030428091)	Joshr	pollinator study ****NO OPEN BUDS IN THE NEAR SITES****
Five Oaks	20	2019-04-18	12:55:00	13:50:00	Duke	984	First Bloom	204		3	POINT (-122.89871961923771 45.010359030428091)	Joshr	pollinator study ****NO OPEN BUDS IN THE NEAR SITES****
Five Oaks	21	2019-04-18	12:55:00	13:50:00	Duke	984	First Bloom	204		1	POINT (-122.89871961923771 45.010359030428091)	Joshr	pollinator study ****NO OPEN BUDS IN THE NEAR SITES****
Five Oaks	22	2019-04-18	12:55:00	13:50:00	Duke	984	First Bloom	204		0	POINT (-122.89871961923771 45.010359030428091)	Joshr	pollinator study ****NO OPEN BUDS IN THE NEAR SITES****
Five Oaks	23	2019-04-18	12:55:00	13:50:00	Duke	984	First Bloom	204		3	POINT (-122.89871961923771 45.010359030428091)	Joshr	pollinator study ****NO OPEN BUDS IN THE NEAR SITES****
Five Oaks	24	2019-04-18	12:55:00	13:50:00	Duke	984	First Bloom	204		0	POINT (-122.89871961923771 45.010359030428091)	Joshr	pollinator study ****NO OPEN BUDS IN THE NEAR SITES****
Five Oaks	25	2019-04-18	12:55:00	13:50:00	Duke	984	First Bloom	204		4	POINT (-122.89871961923771 45.010359030428091)	Joshr	pollinator study ****NO OPEN BUDS IN THE NEAR SITES****
Five Oaks	26	2019-04-18	12:55:00	13:50:00	Duke	984	First Bloom	204		0	POINT (-122.89871961923771 45.010359030428091)	Joshr	pollinator study ****NO OPEN BUDS IN THE NEAR SITES****
Five Oaks	27	2019-04-18	12:55:00	13:50:00	Duke	984	First Bloom	204		18	POINT (-122.89871961923771 45.010359030428091)	Joshr	pollinator study ****NO OPEN BUDS IN THE NEAR SITES****
Five Oaks	28	2019-04-18	12:55:00	13:50:00	Duke	984	First Bloom	204		5	POINT (-122.89871961923771 45.010359030428091)	Joshr	pollinator study ****NO OPEN BUDS IN THE NEAR SITES****
Five Oaks	29	2019-04-18	12:55:00	13:50:00	Duke	984	First Bloom	204		2	POINT (-122.89871961923771 45.010359030428091)	Joshr	pollinator study ****NO OPEN BUDS IN THE NEAR SITES****
Five Oaks	30	2019-04-18	12:55:00	13:50:00	Duke	984	First Bloom	204		6	POINT (-122.89871961923771 45.010359030428091)	Joshr	pollinator study ****NO OPEN BUDS IN THE NEAR SITES****

## Sheet: strength
Season	Adult
Beginning	14.25
Beginning	12.95
Beginning	7.55
Beginning	7.5
Beginning	13.15
Beginning	15.3
Beginning	15.65
Beginning	5.9
Beginning	8.25
Beginning	6.75
Beginning	14.95
Beginning	21.9
Beginning	4.5
Beginning	3.2
Beginning	17.45
Beginning	3.15
Beginning	5.7
Beginning	7.5
Beginning	6.75
Beginning	8.4
Beginning	3.95
Beginning	10.8
Beginning	9.85
Beginning	10.45
Beginning	12.55
Beginning	3.95
Beginning	17.65
Beginning	13.55
Beginning	0.7
Beginning	6.35
Beginning	10.7
Beginning	14.8
Beginning	6.15
Beginning	3.75
Beginning	5.45
Beginning	8.45
Beginning	9.45
Beginning	7.7
Beginning	9.25
Beginning	14.25
Beginning	14.8
Beginning	7.95
Beginning	10.45
End	11.3
End	15.6
End	15.15
End	15.7
End	9.8
End	11.5
End	14.05
End	10.55
End	9
End	8.35
End	10
End	12.8
End	5.9
End	3.95
End	14.2
End	2.15
End	8.6
End	6.25
End	6.55
End	4.7
End	9.15
End	6
End	9.1
End	13.55
End	9.9
End	3.5
End	16.4
End	7.25
End	0.2
End	7.05
End	8.2
End	9.05
End	4.2
End	8.7
End	9.85
End	12.7
End	10.4
End	9.6
End	10.75
End	10.4
End	9.8
End	7.45
End	13.35

## Sheet: newflight
Farm	Field ID	Variety	Colony	Date	Time	Flight Temp (F)	Flight	Season
Eden	267	Duke		2019-04-27	11:53:00	55	28
Eden	267	Duke		2019-04-27	11:53:00	55	32
Eden	267	Duke		2019-04-27	11:55:00	55	16
Eden	267	Duke		2019-04-27	11:55:00	55	14
Eden	267	Duke		2019-04-27	11:55:00	54	47
Eden	267	Duke		2019-04-27	11:55:00	54	44
Eden	267	Duke		2019-04-27	11:55:00	54	83
Eden	267	Duke		2019-04-27	11:55:00	54	79
Eden	267	Duke		2019-05-14	12:31:00		18
Eden	267	Duke		2019-05-14	12:31:00		15
Forest Hills	405	Duke	13	2019-05-05	13:59:00	72	87	Middle
Forest Hills	405	Duke	14	2019-05-05	13:59:00	72	48	Middle
Forest Hills	405	Duke	15	2019-05-05	13:57:00	72	97	Middle
Forest Hills	405	Duke	16	2019-05-05	13:57:00	72	27	Middle
Forest Hills	405	Duke	17	2019-05-05	13:55:00	72	56	Middle
Forest Hills	405	Duke	18	2019-05-05	13:55:00	72	67	Middle
Forest Hills	405	Duke	19	2019-05-05	13:48:00	72	36	Middle
Forest Hills	405	Duke	20	2019-05-05	13:48:00	72	65	Middle
Forest Hills	405	Duke	21	2019-05-05	13:50:00	72	54	Middle
Forest Hills	405	Duke	22	2019-05-05	13:50:00	72	84	Middle
Forest Hills	405	Duke	23	2019-05-05	13:52:00	72	62	Middle
Forest Hills	405	Duke	24	2019-05-05	13:52:00	72	103	Middle
Pan Am	473	Duke		2019-04-22	16:05:00	66	167
Pan Am	473	Duke		2019-04-22	16:05:00	66	163
Pan Am	473	Duke		2019-04-22	16:15:00	66	50
Pan Am	473	Duke		2019-04-22	16:15:00	66	103
Pan Am	473	Duke		2019-04-22	16:16:00	66	58
Pan Am	473	Duke		2019-04-22	16:16:00	66	56
Pan Am	474	Liberty		2019-04-25	12:30:00		98
Pan Am	474	Liberty		2019-04-25	12:30:00		113
Pan Am	474	Liberty		2019-04-25	12:30:00		84
Pan Am	474	Liberty		2019-04-25	12:30:00		74
Pan Am	474	Liberty		2019-04-25	12:30:00		79
Pan Am	474	Liberty		2019-04-25	12:30:00		63
Pan Am	474	Liberty		2019-04-25	12:30:00		65
Pan Am	474	Liberty		2019-04-25	12:30:00		66
Pan Am	474	Liberty		2019-04-25	12:30:00		119
Pan Am	474	Liberty		2019-04-25	12:30:00		104
Pan Am	474	Liberty		2019-04-29	14:30:00		107
Pan Am	474	Liberty		2019-04-29	14:30:00		116
Pan Am	474	Liberty		2019-05-06	13:51:00		128
Pan Am	474	Liberty		2019-05-06	13:51:00		99
Angel Valley	547	Duke	25	2019-04-21	16:04:00	62	55	Beginning
Angel Valley	547	Duke	26	2019-04-21	16:04:00	62	42	Beginning
Angel Valley	547	Duke	27	2019-04-21	16:05:00	62	53	Beginning
Angel Valley	547	Duke	28	2019-04-21	16:05:00	62	110	Beginning
Angel Valley	547	Duke	29	2019-04-21	16:06:00	62	26	Beginning
Angel Valley	547	Duke	30	2019-04-21	16:06:00	62	11	Beginning
Angel Valley	547	Duke	31	2019-04-21	16:10:00	62	27	Beginning
Angel Valley	547	Duke	32	2019-04-21	16:10:00	62	72	Beginning
Angel Valley	547	Duke	33	2019-04-21	16:10:00	62	54	Beginning
Angel Valley	547	Duke	34	2019-04-21	16:10:00	62	33	Beginning
Angel Valley	547	Duke	35	2019-04-21	16:11:00	62	27	Beginning
Angel Valley	547	Duke	36	2019-04-21	16:11:00	62	25	Beginning
Angel Valley	547	Duke	37	2019-04-21	16:07:00	62	43	Beginning
Angel Valley	547	Duke	38	2019-04-21	16:07:00	62	28	Beginning
Angel Valley	547	Duke		2019-04-25	15:00:00		110
Angel Valley	547	Duke		2019-04-25	15:03:00		70
LM	838	Duke		2019-05-13	14:48:00		58
LM	838	Duke		2019-05-13	14:48:00		65
LM	838	Duke		2019-05-13	14:48:00		73
LM	838	Duke		2019-05-10	13:31:00		26
LM	838	Duke		2019-05-10	13:31:00		17
LM	838	Duke		2019-05-10	13:31:00		43
LM	838	Duke		2019-05-07	22:52:00		109
LM	838	Duke		2019-05-07	22:52:00		110
Five Oaks	983	Duke		2019-04-25	13:28:00	64	36
Five Oaks	983	Duke		2019-04-25	13:28:00	64	160
Five Oaks	983	Duke		2019-04-25	13:36:00	64	20
Five Oaks	983	Duke		2019-04-25	13:36:00	64	46
Five Oaks	983	Duke		2019-04-25	13:37:00	64	79
Five Oaks	983	Duke		2019-04-25	13:37:00	64	144
Five Oaks	983	Duke		2019-04-25	13:42:00	64	113
Five Oaks	983	Duke		2019-04-25	13:42:00	64	57
Five Oaks	983	Duke		2019-04-25	13:43:00	64	131
Five Oaks	983	Duke		2019-04-25	13:43:00	64	80
Five Oaks	984	Duke	39	2019-04-28	16:00:00	59	76	Beginning
Five Oaks	984	Duke	40	2019-04-28	16:00:00	59	48	Beginning
Five Oaks	984	Duke	41	2019-04-28	16:30:00	59	85	Beginning
Five Oaks	984	Duke	42	2019-04-28	16:30:00	59	98	Beginning
Five Oaks	984	Duke	43	2019-04-28	16:00:00	58	57	Beginning
Five Oaks	984	Duke	44	2019-04-28	16:00:00	58	55	Beginning
Five Oaks	984	Duke	45	2019-04-28	15:30:00	58	79	Beginning
Five Oaks	984	Duke	46	2019-04-28	15:30:00	58	37	Beginning
Five Oaks	984	Duke	47	2019-04-28	15:45:00	58	135	Beginning
Five Oaks	984	Duke	48	2019-04-28	15:45:00	58	132	Beginning
Five Oaks	984	Duke	49	2019-04-28	16:00:00	58	48	Beginning
Five Oaks	984	Duke	50	2019-04-28	16:00:00	58	136	Beginning
Five Oaks	984	Duke	43	2019-05-11	12:30:00	75	67	Middle
Five Oaks	984	Duke	44	2019-05-11	12:30:00	75	38	Middle
Five Oaks	984	Duke	47	2019-05-11	12:30:00	75	113	Middle
Five Oaks	984	Duke	48	2019-05-11	12:30:00	75	114	Middle
Five Oaks	984	Duke	49	2019-05-11	12:30:00	75	22	Middle
Five Oaks	984	Duke	50	2019-05-11	12:30:00	75	71	Middle
Verboort	1011	Liberty		2019-05-10	22:26:00		140
Verboort	1011	Liberty		2019-05-10	22:26:00		76
Verboort	1011	Liberty		2019-05-03	14:50:00		79
Verboort	1011	Liberty		2019-05-03	14:50:00		84
Verboort	1012	Duke	1	2019-05-05	12:42:00	70	112	Middle
Verboort	1012	Duke	2	2019-05-05	12:42:00	70	127	Middle
Verboort	1012	Duke	3	2019-05-05	12:38:00	70	89	Middle
Verboort	1012	Duke	4	2019-05-05	12:38:00	70	73	Middle
Verboort	1012	Duke	5	2019-05-05	12:40:00	70	75	Middle
Verboort	1012	Duke	6	2019-05-05	12:36:00	70	105	Middle
Verboort	1012	Duke	7	2019-05-05	12:36:00	70	125	Middle
Verboort	1012	Duke	8	2019-05-05	12:30:00	70	84	Middle
Verboort	1012	Duke	9	2019-05-05	12:28:00	70	129	Middle
Verboort	1012	Duke	10	2019-05-05	12:28:00	70	72	Middle
Verboort	1012	Duke	11	2019-05-05	12:27:00	70	100	Middle
Verboort	1012	Duke	12	2019-05-05	12:27:00	70	87	Middle
Eden	1032	Liberty		2019-05-14	12:29:00		12
Eden	1032	Liberty		2019-05-14	12:29:00		10
Casale	1149	Liberty		2019-05-01	15:51:00		160
Casale	1149	Liberty		2019-05-01	15:51:00		150
Casale	1149	Liberty		2019-05-01	15:51:00		110
Casale	1149	Liberty		2019-05-01	15:51:00		137
Casale	1149	Liberty		2019-05-08	15:51:00		92
Casale	1149	Liberty		2019-05-08	15:51:00		124
Casale	1149	Liberty		2019-05-08	15:51:00		85
Casale	1149	Liberty		2019-05-08	15:51:00		97
Casale	1193	Duke		2019-05-11	10:38:00	72	43
Casale	1193	Duke		2019-05-11	10:38:00	72	42
Casale	1193	Duke		2019-05-11	10:38:00	72	19
Casale	1193	Duke		2019-05-11	10:38:00	72	6
Casale	1193	Duke		2019-05-11	10:38:00	72	89
Casale	1193	Duke		2019-05-11	10:38:00	72	84
Casale	1193	Duke		2019-05-11	10:38:00	72	47
Casale	1193	Duke		2019-05-11	10:38:00	72	48
Casale	1193	Duke		2019-05-11	10:38:00	72	23
Casale	1193	Duke		2019-05-11	10:38:00	72	10
Casale	1193	Duke		2019-05-11	10:38:00	72	31
Casale	1193	Duke		2019-05-11	10:38:00	72	41
Casale	1193	Duke		2019-05-11	10:38:00	73	25
Casale	1193	Duke		2019-05-11	10:38:00	73	11
Casale	1193	Duke		2019-05-01	13:54:00		54
Casale	1193	Duke		2019-05-01	13:54:00		53
Casale	1193	Duke		2019-05-01	13:55:00		89
Casale	1193	Duke		2019-05-01	13:55:00		65
Casale	1193	Duke		2019-05-08	13:41:00		84
Casale	1193	Duke		2019-05-08	13:41:00		69
Casale	1193	Duke		2019-05-08	13:41:00		78
Casale	1193	Duke		2019-05-08	13:41:00		73

## Sheet: bees2
Field	Farm	Colony	Date	Assessment	Season	Adult	Brood	Cluster	EFB Severity	Diseases	Pollen Frames	Queen	Cluster Temp
Verboort	Farm 1	1	2020-04-18	FIRST	Beginning	11	8.5	17.375	0	1	4	QLESS	50
Verboort	Farm 1	2	2020-04-18	FIRST	Beginning	14.95	7.75	17.75	0	1	7	QR	50
Verboort	Farm 1	3	2020-04-18	FIRST	Beginning	6.9	7	13.3	0	0	7	QR	50
Verboort	Farm 1	4	2020-04-18	FIRST	Beginning	13.05	6.6	16.95	0	0	5	QR	50
Verboort	Farm 1	5	2020-04-18	FIRST	Beginning	12.15	7.75	16.3	0	1	0	QLESS	50
Verboort	Farm 1	6	2020-04-18	FIRST	Beginning	5.85	5.65	9.25	0	0	1	QR	50
Verboort	Farm 1	7	2020-04-18	FIRST	Beginning	12.6	5.75	17	0	0	3	QLESS	50
Verboort	Farm 1	8	2020-04-18	FIRST	Beginning	7	5	16.35	0	0	0	QR	50
Verboort	Farm 1	9	2020-04-18	FIRST	Beginning	12.15	7.85	19.85	0	2	5	QLESS	50
Verboort	Farm 1	10	2020-04-18	FIRST	Beginning	15.1	5.75	18.25	0	0	3	QR	50
Verboort	Farm 1	11	2020-04-18	FIRST	Beginning	9.4	6.9	18.35	0	0	5	QLESS	50
Verboort	Farm 1	12	2020-04-18	FIRST	Beginning	10.2	7.6	16.375	0	0	4	QR	50
Forest Hills	Farm 2	13	2020-04-18	FIRST	Beginning	7.1	4.75	7.375	0	0	0	QLESS	51
Forest Hills	Farm 2	14	2020-04-18	FIRST	Beginning	6.95	4	11.1875	0	0	3	QR	51
Forest Hills	Farm 2	15	2020-04-18	FIRST	Beginning	3.35	3.45	7.25	0	0	0	QR	51
Forest Hills	Farm 2	16	2020-04-18	FIRST	Beginning	9.6	3.9	14.4375	0	0	2	QR	51
Forest Hills	Farm 2	17	2020-04-18	FIRST	Beginning	5.65	4.05	8	0	0	3	QR	51
Forest Hills	Farm 2	18	2020-04-18	FIRST	Beginning	3.4	4.3	5.75	0	0	1	QR	51
Forest Hills	Farm 2	19	2020-04-18	FIRST	Beginning	1.85	4.3	3.625	1	2	0	QLESS	51
Forest Hills	Farm 2	20	2020-04-18	FIRST	Beginning	10.4	3.8	17	0	0	2	QR	51
Forest Hills	Farm 2	21	2020-04-18	FIRST	Beginning	3.5	3.95	5.5	0	0	0	QR	51
Forest Hills	Farm 2	22	2020-04-18	FIRST	Beginning	8.35	2.65	10.3145	0	0	0	QR	51
Forest Hills	Farm 2	23	2020-04-18	FIRST	Beginning	5.4	2.75	8.3125	0	0	3	QR	51
Forest Hills	Farm 2	24	2020-04-18	FIRST	Beginning	4.6	3.25	6.25	0	0	1	QR	51
Angel Valley	Farm 3	25	2020-04-20	FIRST	Beginning	9.35	4.65	23	0	0	0	QR	42
Angel Valley	Farm 3	27	2020-04-20	FIRST	Beginning	4.65	3.8	5.5	0	0	0	QLESS	42
Angel Valley	Farm 3	28	2020-04-20	FIRST	Beginning	6.6	3.9	10.5	0	1	0	QLESS	42
Angel Valley	Farm 3	29	2020-04-20	FIRST	Beginning	12.7	3.6	17.5	0	0	2	QR	42
Angel Valley	Farm 3	30	2020-04-20	FIRST	Beginning	15.75	5.8	14.25	0	0	2	QR	42
Angel Valley	Farm 3	31	2020-04-20	FIRST	Beginning	9.8	6.3	8	0	0	2	QR	42
Angel Valley	Farm 3	32	2020-04-20	FIRST	Beginning	13.05	7.65	17.5	0	0	1	QR	42
Angel Valley	Farm 3	33	2020-04-20	FIRST	Beginning	3.65	3.75	9.5	0	0	0	QR	42
Angel Valley	Farm 3	34	2020-04-20	FIRST	Beginning	5.1	4.4	8.5	0	1	0	QLESS	42
Angel Valley	Farm 3	35	2020-04-20	FIRST	Beginning	7.3	5.9	9	0	0	1	QR	42
Angel Valley	Farm 3	36	2020-04-20	FIRST	Beginning	9.6	4.24	11.25	0	0	3	QR	42
Verboort	Farm 1	1	2020-05-15	SECOND	End	15.45	8.8	0	0	0	3	QR	64
Verboort	Farm 1	2	2020-05-15	SECOND	End	6.5	7.85	0	1	2	2	QR	64
Verboort	Farm 1	3	2020-05-15	SECOND	End	13.1	11	0	0	0	3	QR	64
Verboort	Farm 1	4	2020-05-15	SECOND	End	13.75	7.15	0	0	0	3	QR	64
Verboort	Farm 1	5	2020-05-15	SECOND	End	10.55	6.55	0	3	1	2	QR	64
Verboort	Farm 1	6	2020-05-15	SECOND	End	19.2	9.65	0	0	1	0	QR	64
Verboort	Farm 1	10	2020-05-15	SECOND	End	9.24	5.2	0	1	1	2	QR	64
Verboort	Farm 1	11	2020-05-15	SECOND	End	22.49	12.7	0	0	1	3	QR	64
Forest Hills	Farm 2	13	2020-05-21	SECOND	End	4.4	0.6	0	1	1	0	QR	51
Forest Hills	Farm 2	14	2020-05-21	SECOND	End	6.85	5.9	0	0	0	1	QLESS	51
Forest Hills	Farm 2	15	2020-05-21	SECOND	End	4.1	7.95	0	3	2	1	QLESS	51
Forest Hills	Farm 2	16	2020-05-21	SECOND	End	22.15	6.5	0	1	1	0	QR	51
Forest Hills	Farm 2	17	2020-05-21	SECOND	End	6.5	5.9	0	1	1	2	QR	51
Forest Hills	Farm 2	18	2020-05-21	SECOND	End	7.6	6	0	0	0	0	QLESS	51
Forest Hills	Farm 2	20	2020-05-21	SECOND	End	6.8	1.5	0	3	1	0	QLESS	51
Forest Hills	Farm 2	21	2020-05-21	SECOND	End	2.95	2.15	0	0	1	0	QR	51
Forest Hills	Farm 2	22	2020-05-21	SECOND	End	9.2	6.55	0	1	2	0	QR	51
Forest Hills	Farm 2	23	2020-05-21	SECOND	End	16.4	11.4	0	0	1	2	QLESS	51
Angel Valley	Farm 3	25	2020-05-25	SECOND	End	13.3	3.5	0	0	0	3	QLESS	51
Angel Valley	Farm 3	26	2020-05-25	SECOND	End	10.6	7.2	0	3	2	0	QR	51
Angel Valley	Farm 3	27	2020-05-25	SECOND	End	8.2	6.9	0	1	1	1	QR	51
Angel Valley	Farm 3	28	2020-05-25	SECOND	End	4.6	3.2	0	0	0	0	QLESS	51
Angel Valley	Farm 3	29	2020-05-25	SECOND	End	5.4	3.05	0	0	0	1	QR	51
Angel Valley	Farm 3	30	2020-05-25	SECOND	End	9.1	5.95	0	3	0	0	QLESS	51
Angel Valley	Farm 3	31	2020-05-25	SECOND	End	8.75	5.9	0	3	1	0	QLESS	51
Angel Valley	Farm 3	32	2020-05-25	SECOND	End	25.85	12.1	0	3	1	2	QR	51
Angel Valley	Farm 3	34	2020-05-25	SECOND	End	13.2	6.8	0	3	1	2	QR	51
Angel Valley	Farm 3	35	2020-05-25	SECOND	End	1.6	0.3	0	3	0	0	QLESS	51
Angel Valley	Farm 3	36	2020-05-25	SECOND	End	7.7	5	0	2	2	1	QR	51

[truncated: 4 more sheets: berry2020, visitation2020, flight2noav, apiary2020]
